# Supplementary material
Source: publisher figshare collection journal article supplement (https://gsapubs.figshare.com/articles/dataset/_/24128652)
Supplement: Supplementary file 1 [file 1]

## Sheet: Sample Names and Analyses Dates
	SAMPLE LOCATIONS, AND DATES OF ANALYSES AT UNIVERSITY OF ARIZONA LASERCHRON
Sample Name	Basin name	Sample material	Analysis type	n, number of total grains analyzed	Latitude	Longitude	Elevation (m.a.s.l.)	Dates of analyses at LaserChron
DC-RCR	Weaverville	detrital sand	U-Pb detrital zircon	102	40.7899	-122.883	754	January, 2020
DCOH-02	Lowden Ranch	detrital sand	U-Pb detrital zircon	323	40.6731	-122.873	846	May, 2019; January 2020; October, 2020
DC-BVR	Hayfork	detrital sand	U-Pb detrital zircon	282	40.5712	-123.109	768	January, 2020
DC-HYA	Hyampom	detrital sand	U-Pb detrital zircon	155	40.6162	-123.45	482	May, 2019

## Sheet: DC-HYA datatable 5-2019
U-Pb geochronologic analyses.
							Isotope ratios						Apparent ages (Ma)
Analysis	U	206Pb	U/Th	206Pb*	±	207Pb*	±	206Pb*	±	error	206Pb*	±	207Pb*	±	206Pb*	±	Best age	±	Conc
	(ppm)	204Pb		207Pb*	(%)	235U*	(%)	238U	(%)	corr.	238U*	(Ma)	235U	(Ma)	207Pb*	(Ma)	(Ma)	(Ma)	(%)
DC-HYA; Hyampom basin
-Spot 75	206.951	35842.9	2.16536	20.6663	1.21124	0.135597	1.58887	0.020333	1.02831	0.647193	129.76	1.32099	129.114	1.9264	117.275	28.561	129.76	1.32099	100.5
-Spot 94	212.807	18495.3	3.25746	20.1019	1.48647	0.141326	1.7505	0.0206134	0.924486	0.528126	131.531	1.20367	134.225	2.20093	182.127	34.6345	131.531	1.20367	97.9934
-Spot 61	89.6885	2618.56	2.08946	22.1053	2.10104	0.128661	2.30357	0.0206362	0.944504	0.410017	131.675	1.23106	122.893	2.66633	NA	NA	131.675	1.23106	107.146
-Spot 134	128.216	9160.76	1.70867	20.9449	1.72224	0.135993	1.92903	0.0206672	0.868922	0.450446	131.871	1.13422	129.468	2.34481	85.612	40.8747	131.871	1.13422	101.856
-Spot 14	107.815	4738.78	1.66883	21.2842	2.0842	0.134605	2.38498	0.0207877	1.15941	0.48613	132.633	1.52204	128.227	2.87298	47.3241	49.7722	132.633	1.52204	103.436
-Spot 201	136.407	21278.7	3.67601	20.6761	1.53754	0.13857	1.86021	0.0207885	1.04708	0.56288	132.638	1.37462	131.769	2.2988	116.158	36.2706	132.638	1.37462	100.659
-Spot 34	347.595	30803	6.02152	20.0076	1.12717	0.144157	1.97257	0.0209275	1.6188	0.820657	133.515	2.13912	136.74	2.52356	193.122	26.2324	133.515	2.13912	97.642
-Spot 19	111.285	21279.9	2.76033	20.5984	1.40197	0.140102	1.67577	0.0209394	0.917984	0.547797	133.59	1.21372	133.134	2.09096	124.984	33.0168	133.59	1.21372	100.343
-Spot 208	144.701	11122	1.60638	20.8659	1.54821	0.138372	1.7669	0.0209495	0.851446	0.481888	133.654	1.12627	131.593	2.18075	94.5465	36.6805	133.654	1.12627	101.566
-Spot 103	145.672	22669.4	2.12231	20.2833	1.57675	0.14308	1.80312	0.0210575	0.874707	0.485107	134.336	1.16289	135.784	2.2917	161.18	36.9025	134.336	1.16289	98.9337
-Spot 79	84.4469	14514.4	3.61517	19.9289	2.48836	0.145731	2.65294	0.0210729	0.919872	0.346737	134.433	1.22381	138.136	3.42632	202.246	57.7906	134.433	1.22381	97.3196
-Spot 140	53.2005	7198.48	1.85702	19.963	3.44763	0.145668	3.68112	0.0210997	1.29014	0.350476	134.603	1.71856	138.079	4.75244	198.285	80.1307	134.603	1.71856	97.4821
-Spot 219	111.299	7507.28	1.46632	20.847	2.25699	0.139845	2.46144	0.0211532	0.982184	0.399029	134.94	1.31159	132.905	3.06634	96.7122	53.4412	134.94	1.31159	101.531
-Spot 205	75.8469	3922.76	1.9435	22.5607	4.87604	0.129624	4.99329	0.021219	1.07575	0.215438	135.356	1.4409	123.759	5.81797	NA	NA	135.356	1.4409	109.37
-Spot 31	74.1592	3228.51	3.26553	22.1775	2.20084	0.132006	2.41166	0.021242	0.986117	0.408895	135.5	1.32225	125.899	2.85557	NA	NA	135.5	1.32225	107.626
-Spot 206	74.0293	4496.09	2.21108	21.7272	2.24182	0.135184	2.4733	0.0213117	1.04472	0.422398	135.94	1.40532	128.746	2.99067	NA	NA	135.94	1.40532	105.588
-Spot 112	129.362	17290	3.14339	20.8198	1.5859	0.141168	2.02887	0.0213255	1.26539	0.623695	136.028	1.70326	134.084	2.54842	99.7709	37.5192	136.028	1.70326	101.45
-Spot 149	293.967	38870.5	1.87863	20.1352	1.23374	0.146359	1.43543	0.0213827	0.733705	0.511141	136.389	0.990179	138.692	1.86084	178.274	28.7726	136.389	0.990179	98.3394
-Spot 15	248.891	209117	1.38741	20.3356	1.2328	0.145012	1.59037	0.0213968	1.00472	0.631755	136.477	1.35681	137.498	2.04513	155.176	28.8436	136.477	1.35681	99.2579
-Spot 73	127.976	15175.3	3.43369	20.1157	1.79828	0.146991	2.04686	0.0214542	0.977665	0.47764	136.84	1.32374	139.251	2.66348	180.531	41.9124	136.84	1.32374	98.2684
-Spot 22	157.962	38393.9	3.03151	20.1108	1.8005	0.147166	2.0695	0.0214746	1.02031	0.493022	136.968	1.38276	139.407	2.69574	181.102	41.9622	136.968	1.38276	98.2511
-Spot 91	28.5955	2191.96	1.94654	20.4099	4.32722	0.145332	4.55925	0.0215224	1.43595	0.314953	137.27	1.95029	137.782	5.87434	146.639	101.511	137.27	1.95029	99.6283
-Spot 53	63.8968	3260.93	2.33257	21.4543	2.60317	0.138454	2.75606	0.0215529	0.905202	0.32844	137.463	1.23114	131.666	3.40337	28.2709	62.4116	137.463	1.23114	104.403
-Spot 143	100.556	22161.9	3.4487	20.2178	2.0389	0.147249	2.25263	0.021601	0.957736	0.425163	137.766	1.30544	139.48	2.93573	168.724	47.6036	137.766	1.30544	98.7713
-Spot 88	359.899	25015.4	0.928717	20.6866	1.22922	0.143915	2.01318	0.0216015	1.59434	0.791951	137.769	2.17321	136.525	2.57173	114.913	28.9747	137.769	2.17321	100.912
-Spot 69	50.6116	6233.65	2.07046	19.5445	2.6041	0.152332	2.81909	0.0216024	1.07979	0.383028	137.775	1.4719	143.969	3.78402	247.29	59.9648	137.775	1.4719	95.6982
-Spot 90	387.712	32936.8	2.87494	20.6368	1.13428	0.144829	1.8174	0.0216863	1.41998	0.781325	138.305	1.94298	137.336	2.33451	120.596	26.7292	138.305	1.94298	100.705
-Spot 9	130.902	9376.67	2.29613	20.7657	1.43241	0.144215	1.86314	0.0217293	1.19141	0.639467	138.576	1.63339	136.791	2.3844	105.905	33.8593	138.576	1.63339	101.304
-Spot 6	136.958	18606.3	2.97667	19.7804	2.16029	0.151405	2.67537	0.0217302	1.57821	0.589903	138.582	2.16376	143.152	3.57214	219.595	49.994	138.582	2.16376	96.8072
-Spot 30	44.6015	32466.6	2.90342	18.8274	2.9936	0.159082	3.13965	0.0217319	0.946449	0.30145	138.592	1.29771	149.899	4.37544	332.683	67.8897	138.592	1.29771	92.457
-Spot 133	57.4331	14329.8	4.97698	19.4111	2.15134	0.154329	2.29718	0.0217363	0.805465	0.350632	138.62	1.10462	145.727	3.11849	263.036	49.3953	138.62	1.10462	95.1233
-Spot 8	115.471	18603	1.82276	20.0503	2.05387	0.149785	2.36045	0.0217909	1.16333	0.492844	138.964	1.59932	141.722	3.12231	188.121	47.7956	138.964	1.59932	98.0545
-Spot 87	113.865	5679.57	2.41027	20.4675	3.32659	0.146743	3.64333	0.0217927	1.48581	0.407817	138.976	2.04282	139.032	4.73395	139.987	78.1218	138.976	2.04282	99.9594
-Spot 125	88.0786	3847.26	2.39421	21.5087	2.52231	0.139698	2.65541	0.0218018	0.830168	0.312632	139.033	1.14185	132.775	3.30494	22.2055	60.5281	139.033	1.14185	104.713
-Spot 33	188.921	9288.42	3.50364	20.5465	1.74615	0.146318	2.00438	0.0218134	0.984121	0.490985	139.107	1.35431	138.656	2.59779	130.94	41.0485	139.107	1.35431	100.325
-Spot 35	137.277	8043.63	1.7928	20.9788	1.62622	0.143388	1.98163	0.0218263	1.13238	0.571438	139.188	1.55924	136.057	2.52333	81.7294	38.5903	139.188	1.55924	102.301
-Spot 38	187.466	12967.4	1.76448	19.7583	2.27702	0.152247	3.29125	0.0218265	2.37644	0.722049	139.189	3.2723	143.894	4.41566	222.159	52.6713	139.189	3.2723	96.7307
-Spot 13	141.513	14032.4	2.38753	20.594	1.9121	0.146522	2.18605	0.0218943	1.05957	0.484696	139.617	1.46343	138.837	2.83669	125.492	45.0209	139.617	1.46343	100.562
-Spot 28	61.9749	2507.93	2.52777	23.246	2.52739	0.129847	2.72142	0.0219012	1.0092	0.370834	139.66	1.39429	123.96	3.1757	NA	NA	139.66	1.39429	112.666
-Spot 123	68.745	2315.33	1.54287	22.5992	2.3154	0.133662	2.60662	0.0219174	1.19724	0.459308	139.763	1.65529	127.383	3.12058	NA	NA	139.763	1.65529	109.718
-Spot 214	64.716	5299.4	4.44317	21.7148	2.63961	0.139283	2.84226	0.0219452	1.05397	0.370823	139.938	1.45902	132.405	3.52826	NA	NA	139.938	1.45902	105.69
-Spot 138	180.63	36935.8	2.69513	18.5951	1.34768	0.162651	1.92243	0.0219453	1.37094	0.713132	139.939	1.89781	153.021	2.73079	360.749	30.384	139.939	1.89781	91.4507
-Spot 215	96.8258	3505.11	2.29222	21.2843	2.62811	0.142198	2.79955	0.0219605	0.964614	0.344561	140.034	1.33622	135	3.53893	47.3209	62.7705	140.034	1.33622	103.729
-Spot 63	75.5102	4436.41	3.29147	21.9072	4.08172	0.138192	4.19582	0.0219662	0.971872	0.231628	140.071	1.34662	131.432	5.1727	NA	NA	140.071	1.34662	106.573
-Spot 41	93.0596	5077.13	1.62734	20.5554	2.16178	0.14731	2.33334	0.0219709	0.878183	0.376362	140.1	1.21706	139.534	3.04202	129.902	50.8591	140.1	1.21706	100.405
-Spot 119	76.2395	3797.63	2.12679	21.5609	4.64967	0.14045	4.75804	0.0219724	1.00973	0.212215	140.109	1.39946	133.445	5.94988	16.389	111.77	140.109	1.39946	104.994
-Spot 89	92.7329	20018.2	3.88722	17.388	3.3192	0.174161	3.54023	0.0219729	1.2313	0.347803	140.113	1.7066	163.023	5.33197	510.222	73.0038	140.113	1.7066	85.9464
-Spot 118	45.0999	2412.13	2.48475	20.8336	2.26617	0.145376	2.65785	0.0219758	1.38875	0.522508	140.131	1.92507	137.821	3.42536	98.2214	53.6308	140.131	1.92507	101.676
-Spot 211	106.558	63506.3	1.90334	19.6659	1.70469	0.154022	1.92717	0.0219778	0.89889	0.46643	140.144	1.24614	145.457	2.61167	233.022	39.3303	140.144	1.24614	96.3474
-Spot 124	156.225	17311.4	2.67294	19.6965	1.64426	0.153922	2.03377	0.0219978	1.19693	0.588528	140.27	1.6608	145.369	2.7546	229.388	37.9595	140.27	1.6608	96.4921
-Spot 27	69.1087	14535.8	1.64252	19.893	1.92801	0.15247	2.20754	0.0220076	1.07517	0.487046	140.332	1.4925	144.091	2.96547	206.416	44.7426	140.332	1.4925	97.3912
-Spot 54	167.474	45056.3	2.58336	20.5557	1.23368	0.14764	1.65793	0.0220203	1.10758	0.668054	140.412	1.53836	139.826	2.16568	129.889	29.0148	140.412	1.53836	100.419
-Spot 32	31.9987	3858.55	2.27072	22.3178	3.70222	0.136157	3.98389	0.0220484	1.47137	0.369331	140.589	2.0462	129.615	4.84776	NA	NA	140.589	2.0462	108.467
-Spot 96	71.0393	4459.43	1.89109	21.345	4.31617	0.142397	4.48491	0.0220539	1.21862	0.271716	140.624	1.69511	135.177	5.6764	40.5388	103.261	140.624	1.69511	104.029
-Spot 216	109.767	10024.9	2.06167	20.5094	2.40423	0.148262	2.60732	0.0220634	1.00884	0.386926	140.683	1.40389	140.377	3.41834	135.176	56.5312	140.683	1.40389	100.219
-Spot 80	59.5179	8279.49	1.75619	20.3832	2.3509	0.149192	2.47395	0.0220651	0.770513	0.311451	140.694	1.07232	141.198	3.26118	149.658	55.1044	140.694	1.07232	99.6432
-Spot 129	206.706	115126	2.11769	20.0199	1.33737	0.151999	1.58645	0.0220795	0.853384	0.537921	140.785	1.18842	143.675	2.12542	191.69	31.0876	140.785	1.18842	97.9886
-Spot 154	96.7468	15918.5	2.95338	20.9615	2.13961	0.145464	2.46651	0.0221241	1.22709	0.497501	141.067	1.71221	137.899	3.18045	83.683	50.794	141.067	1.71221	102.297
-Spot 74	45.4016	16371.2	2.46711	20.5922	2.70861	0.148286	2.89946	0.022156	1.03457	0.356814	141.268	1.44561	140.398	3.8019	125.696	63.79	141.268	1.44561	100.62
-Spot 86	77.9295	14383.7	2.19916	20.255	2.28135	0.151117	2.63266	0.0222092	1.3139	0.499077	141.603	1.84024	142.898	3.5093	164.421	53.3541	141.603	1.84024	99.0942
-Spot 116	60.3286	4046.32	2.92488	21.1718	2.12922	0.144673	2.39917	0.0222246	1.10564	0.460843	141.7	1.5496	137.198	3.07892	59.9659	50.7364	141.7	1.5496	103.282
-Spot 64	224.289	22264.6	16.6488	20.1706	1.22111	0.152087	1.42678	0.0222587	0.737975	0.517231	141.915	1.03585	143.753	1.91247	174.176	28.4877	141.915	1.03585	98.7213
-Spot 76	208.721	34667	3.02565	19.9396	1.32024	0.153893	1.72565	0.0222649	1.11124	0.643952	141.955	1.56021	145.343	2.33688	200.989	30.6549	141.955	1.56021	97.6686
-Spot 2	72.081	117992	2.38855	19.8805	2.20612	0.154483	2.55874	0.0222841	1.29621	0.50658	142.075	1.82144	145.862	3.47656	207.876	51.1534	142.075	1.82144	97.4037
-Spot 99	45.0215	11591.9	2.19478	20.4102	3.28312	0.150649	3.48161	0.02231	1.15877	0.332825	142.239	1.63016	142.485	4.62846	146.605	77.0113	142.239	1.63016	99.8274
-Spot 46	94.7429	56114.8	3.62002	19.7443	2.29847	0.156042	2.6105	0.0223548	1.23763	0.474097	142.521	1.74453	147.233	3.57785	223.819	53.1732	142.521	1.74453	96.7999
-Spot 209	79.334	4223.02	3.02378	22.3185	2.71936	0.138336	2.97078	0.0224022	1.19609	0.402618	142.82	1.68947	131.561	3.6658	NA	NA	142.82	1.68947	108.558
-Spot 82	40.0428	4397.02	3.17203	20.0331	3.84111	0.154362	4.10737	0.0224376	1.45475	0.354181	143.043	2.05801	145.756	5.57695	190.162	89.4037	143.043	2.05801	98.1386
-Spot 62	52.3474	2923.5	1.65373	21.8248	2.73686	0.142064	2.90299	0.0224969	0.967964	0.333437	143.417	1.3729	134.881	3.66667	NA	NA	143.417	1.3729	106.329
-Spot 108	62.6027	21375.6	1.88773	19.9899	2.28586	0.155329	2.4549	0.0225295	0.895217	0.364665	143.623	1.27152	146.606	3.3513	195.176	53.1137	143.623	1.27152	97.9648
-Spot 42	42.4621	7220.82	2.24566	19.6669	3.63668	0.158151	3.79994	0.0225682	1.10185	0.289964	143.867	1.56763	149.084	5.26888	232.907	83.9587	143.867	1.56763	96.5006
-Spot 115	55.757	2580.32	2.97142	20.5887	2.95296	0.151377	3.10314	0.022614	0.953703	0.307334	144.155	1.35955	143.127	4.14263	126.138	69.5495	144.155	1.35955	100.718
-Spot 107	549.163	490942	2.60015	20.4414	0.78766	0.152602	1.17847	0.0226339	0.876568	0.743822	144.281	1.25067	144.207	1.58427	142.995	18.5042	144.281	1.25067	100.051
-Spot 117	135.356	6832.16	2.19803	20.8226	1.94265	0.149871	2.18893	0.0226434	1.00872	0.46083	144.341	1.43982	141.798	2.89689	99.4709	45.963	144.341	1.43982	101.793
-Spot 203	45.4716	3677.63	3.1963	21.3047	3.99978	0.146526	4.17295	0.0226506	1.18963	0.285082	144.386	1.69857	138.84	5.41512	45.0067	95.6208	144.386	1.69857	103.994
-Spot 21	178.845	20545.8	1.75746	20.4655	1.50585	0.152783	1.9226	0.0226874	1.19532	0.621721	144.618	1.7094	144.366	2.5873	140.241	35.3574	144.618	1.7094	100.175
-Spot 7	73.8897	5694.57	2.09567	20.1263	2.17846	0.155659	2.48363	0.0227314	1.19278	0.480258	144.895	1.70901	146.896	3.39675	179.306	50.7643	144.895	1.70901	98.6377
-Spot 78	42.9781	7493.16	2.32177	20.5869	2.56512	0.152325	2.94714	0.0227535	1.45113	0.492387	145.035	2.08114	143.962	3.95574	126.349	60.3879	145.035	2.08114	100.745
-Spot 128	78.0698	23597.3	1.58968	20.5735	1.97212	0.152634	2.31737	0.0227849	1.21695	0.525142	145.233	1.74765	144.235	3.11593	127.881	46.4135	145.233	1.74765	100.692
-Spot 77	48.2912	29673.9	3.23433	19.2789	3.53376	0.162902	3.7239	0.0227875	1.17472	0.315454	145.249	1.68719	153.24	5.29682	278.717	80.9075	145.249	1.68719	94.7851
-Spot 144	141.033	16344	3.2272	20.035	1.62114	0.156855	1.84614	0.0228021	0.883256	0.478435	145.341	1.26937	147.946	2.54164	189.938	37.711	145.341	1.26937	98.239
-Spot 66	39.5112	3572.23	3.12534	20.9892	3.81277	0.149759	4.02812	0.0228074	1.29943	0.32259	145.375	1.8679	141.699	5.32748	80.5469	90.5241	145.375	1.8679	102.594
-Spot 111	159.941	73889.8	2.15503	20.6234	1.54816	0.152488	1.95497	0.0228184	1.19379	0.610642	145.444	1.71685	144.107	2.62647	122.127	36.4726	145.444	1.71685	100.928
-Spot 1	420.819	38399.7	4.21518	20.4733	1.04198	0.153946	1.76887	0.0228688	1.4294	0.808086	145.761	2.06013	145.39	2.39612	139.346	24.4691	145.761	2.06013	100.256
-Spot 136	41.5416	7318.02	2.17247	19.5671	2.79188	0.161285	2.94899	0.0228987	0.949705	0.322044	145.949	1.37052	151.828	4.15874	244.615	64.335	145.949	1.37052	96.1283
-Spot 132	169.321	7285.98	2.32151	19.998	1.45003	0.157844	1.66038	0.0229035	0.808882	0.487166	145.98	1.16754	148.814	2.29835	194.236	33.7005	145.98	1.16754	98.0957
-Spot 81	66.3716	2308.17	2.98376	23.022	2.69142	0.138378	2.96032	0.0231152	1.23278	0.416434	147.314	1.79546	131.598	3.65384	NA	NA	147.314	1.79546	111.942
-Spot 122 c1	58.6532	7734.06	3.42387	20.8829	2.39804	0.15297	2.66542	0.0231785	1.16354	0.436533	147.713	1.69916	144.531	3.59076	92.6344	56.8244	147.713	1.69916	102.201
-Spot 148	58.2679	6064.27	1.63986	20.8973	2.49269	0.152912	2.84436	0.0231857	1.37	0.481656	147.758	2.00127	144.48	3.83056	90.9856	59.0832	147.758	2.00127	102.269
-Spot 3	203.539	16173.8	4.3021	20.5522	1.75546	0.155487	2.07901	0.0231867	1.11384	0.535753	147.765	1.62714	146.745	2.84064	130.296	41.2721	147.765	1.62714	100.695
-Spot 101	67.9829	10765.3	4.13299	20.2379	1.98832	0.158534	2.28846	0.0232796	1.13297	0.49508	148.35	1.66157	149.419	3.17972	166.405	46.4752	148.35	1.66157	99.2841
-Spot 92	93.0989	6855.98	2.14068	20.4853	2.02714	0.160583	2.25067	0.0238688	0.977854	0.434473	152.06	1.46953	151.214	3.16203	137.941	47.6028	152.06	1.46953	100.56
-Spot 121 r1	216.79	23911.2	1.71696	18.8852	1.2106	0.180446	1.6261	0.0247262	1.08565	0.667639	157.456	1.68871	168.444	2.52394	325.75	27.4857	157.456	1.68871	93.4767
-Spot 5	152.19	17524.8	2.27409	20.1316	1.55755	0.173812	1.88364	0.025389	1.0593	0.562371	161.625	1.69081	162.722	2.8321	178.688	36.3189	161.625	1.69081	99.326
-Spot 18	188.24	12319.2	3.43283	20.2301	1.70259	0.173415	2.02555	0.0254549	1.09729	0.541723	162.039	1.75587	162.378	3.03954	167.302	39.7761	162.039	1.75587	99.7912
-Spot 95	185.88	38900.5	3.64064	19.4142	1.40704	0.180806	1.75697	0.0254695	1.05224	0.598892	162.131	1.68473	168.754	2.73168	262.639	32.3161	162.131	1.68473	96.0754
-Spot 40	154.998	17311.8	2.22216	20.5238	1.19757	0.171127	1.50159	0.0254838	0.905866	0.603271	162.221	1.45117	160.396	2.2279	133.545	28.1643	162.221	1.45117	101.137
-Spot 105	125.53	137864	3.30847	19.7068	1.68064	0.179859	1.95991	0.025718	1.00832	0.514473	163.693	1.62977	167.939	3.03368	228.199	38.831	163.693	1.62977	97.4714
-Spot 59	237.147	10606.8	2.04817	20.6712	1.72333	0.171591	1.904	0.0257364	0.809541	0.425178	163.808	1.30939	160.799	2.8315	116.715	40.6561	163.808	1.30939	101.872
-Spot 102	198.868	8326.52	2.30017	20.9968	1.40844	0.169594	1.66342	0.0258375	0.885022	0.532049	164.444	1.43696	159.066	2.44911	79.693	33.4423	164.444	1.43696	103.381
-Spot 50	184.996	18872.4	2.6336	20.0129	1.40677	0.178126	1.77199	0.0258657	1.07747	0.608059	164.621	1.75129	166.447	2.72037	192.508	32.7236	164.621	1.75129	98.9032
-Spot 60	167.385	53928.1	1.80366	19.9178	1.38342	0.179001	1.7056	0.0258693	0.997598	0.584896	164.643	1.62168	167.201	2.62935	203.529	32.1181	164.643	1.62168	98.4706
-Spot 131	154.5	180559	2.40324	20.2394	1.46756	0.176165	1.75619	0.0258705	0.964606	0.549261	164.651	1.56812	164.755	2.67087	166.223	34.2831	164.651	1.56812	99.9371
-Spot 113	151.413	18238.4	2.73458	20.8032	1.19158	0.171686	1.51272	0.0259151	0.931904	0.616048	164.931	1.51751	160.881	2.25067	101.69	28.1745	164.931	1.51751	102.517
-Spot 43	136.97	38522.7	3.10253	20.1961	1.44413	0.176956	1.74024	0.025931	0.97105	0.557997	165.032	1.5822	165.438	2.65672	171.228	33.7222	165.032	1.5822	99.7546
-Spot 67	106.778	3606.62	2.55451	21.4508	1.74985	0.166816	1.90191	0.0259638	0.745184	0.391808	165.238	1.21568	156.652	2.76094	28.6815	41.9356	165.238	1.21568	105.481
-Spot 151	200.179	32302.9	4.14275	19.7648	1.19451	0.181072	1.48496	0.0259677	0.882197	0.594087	165.262	1.4394	168.983	2.31165	221.435	27.6143	165.262	1.4394	97.7978
-Spot 65	171.413	74656.3	1.86143	20.3707	1.30978	0.175873	1.56902	0.0259952	0.863889	0.550592	165.435	1.41099	164.503	2.38286	151.105	30.6774	165.435	1.41099	100.566
-Spot 44	147.765	124711	4.41087	19.6772	1.52393	0.182126	1.75258	0.026003	0.865536	0.493864	165.484	1.41409	169.888	2.74168	231.658	35.1724	165.484	1.41409	97.4073
-Spot 204	186.5	7657.07	1.96722	20.7069	1.51261	0.173093	1.71542	0.0260066	0.809132	0.471681	165.506	1.32212	162.1	2.5701	112.613	35.7044	165.506	1.32212	102.102
-Spot 135	117.6	14544.5	2.15461	20.3286	1.77526	0.176318	2.09613	0.0260071	1.11455	0.531716	165.51	1.8212	164.888	3.19023	155.982	41.5656	165.51	1.8212	100.377
-Spot 70	128.966	10476.7	3.59536	21.2316	1.69009	0.168931	1.94881	0.0260243	0.970273	0.49788	165.618	1.58648	158.491	2.8597	53.2236	40.3482	165.618	1.58648	104.497
-Spot 55	117.857	24826.4	3.55454	19.8319	2.18791	0.180894	2.45684	0.0260301	1.11763	0.454907	165.654	1.82782	168.83	3.8214	213.596	50.6996	165.654	1.82782	98.119
-Spot 213	113.555	174130	2.68031	19.957	1.19837	0.179861	1.56983	0.0260446	1.01404	0.645956	165.745	1.65931	167.941	2.42991	199.01	27.8414	165.745	1.65931	98.6928
-Spot 26	256.86	268341	1.93358	20.2602	1.21136	0.177255	1.67929	0.0260574	1.16302	0.692566	165.826	1.90399	165.696	2.56735	163.822	28.3301	165.826	1.90399	100.078
-Spot 10	172.36	30005.5	1.86326	20.65	1.6313	0.174109	2.06957	0.0260873	1.27358	0.615381	166.014	2.08732	162.979	3.1162	119.14	38.4528	166.014	2.08732	101.862
-Spot 114	118.931	20083.3	2.57865	20.1729	1.22088	0.178301	1.44202	0.0260981	0.767381	0.532158	166.081	1.2582	166.597	2.21564	173.914	28.4863	166.081	1.2582	99.6902
-Spot 150	148.015	26120.1	2.83272	20.2205	1.80035	0.177911	2.09943	0.0261025	1.07998	0.514416	166.109	1.77103	166.262	3.21976	168.412	42.0495	166.109	1.77103	99.9082
-Spot 97	161.679	26595.4	2.04436	19.8804	1.41032	0.180966	1.77638	0.0261042	1.08006	0.608014	166.12	1.77128	168.892	2.76393	207.883	32.7055	166.12	1.77128	98.3588
-Spot 37	205.971	22494.3	1.98305	20.3419	1.17146	0.176884	1.44373	0.0261076	0.843826	0.584477	166.141	1.38403	165.375	2.20328	154.41	27.4105	166.141	1.38403	100.463
-Spot 57	159.68	8573.25	1.91566	20.7438	1.24714	0.17351	1.48368	0.0261156	0.803698	0.541694	166.191	1.31861	162.46	2.22744	108.422	29.4559	166.191	1.31861	102.297
-Spot 36	174.315	15280.6	2.25798	20.5985	1.218	0.175128	1.57553	0.0261745	0.999387	0.634317	166.561	1.64327	163.859	2.38412	124.973	28.6745	166.561	1.64327	101.649
-Spot 202	148.327	14430	3.24271	20.523	1.65695	0.175833	2.00165	0.0261836	1.123	0.561037	166.618	1.84715	164.468	3.03931	133.653	38.9384	166.618	1.84715	101.307
-Spot 39	230.447	11664.3	2.03664	20.7344	1.11646	0.174361	1.47289	0.0262318	0.96069	0.652249	166.921	1.58301	163.197	2.22049	109.473	26.3681	166.921	1.58301	102.282
-Spot 58	168.055	56747.8	2.76026	19.372	1.46546	0.186759	1.65118	0.0262509	0.760802	0.460763	167.041	1.25453	173.86	2.63841	267.628	33.6109	167.041	1.25453	96.078
-Spot 217	221.925	13862.4	1.87526	20.2971	1.32701	0.178365	1.63211	0.0262682	0.950163	0.582171	167.15	1.56778	166.652	2.50847	159.619	31.0471	167.15	1.56778	100.298
-Spot 17	87.8542	6717.55	2.97127	20.2851	2.10088	0.178581	2.34644	0.0262846	1.04503	0.445366	167.253	1.72536	166.839	3.61009	160.95	49.1326	167.253	1.72536	100.248
-Spot 25	69.9326	7948.89	3.08466	20.2879	2.23233	0.178934	2.48295	0.0263402	1.08709	0.437821	167.602	1.7985	167.143	3.82652	160.672	52.2412	167.602	1.7985	100.275
-Spot 126	100.8	29489.8	2.44084	20.3413	1.64709	0.17863	1.86176	0.0263645	0.867895	0.46617	167.755	1.43716	166.881	2.86504	154.528	38.5938	167.755	1.43716	100.524
-Spot 145	297.765	113064	1.99547	20.182	1.173	0.18029	1.45904	0.0264012	0.867679	0.594693	167.985	1.43874	168.31	2.26297	172.857	27.3627	167.985	1.43874	99.807
-Spot 48	159.434	55311.1	2.95026	20.1462	1.35982	0.180694	1.68838	0.0264135	1.00076	0.592731	168.063	1.66016	168.658	2.62367	176.995	31.7118	168.063	1.66016	99.647
-Spot 93	225.976	32688.3	1.9786	20.5476	1.43102	0.177546	1.78576	0.0264703	1.06823	0.598194	168.419	1.77581	165.946	2.73392	130.837	33.6588	168.419	1.77581	101.49
-Spot 20	347.459	16292.5	1.81703	20.4168	0.93141	0.17879	1.51379	0.0264862	1.19334	0.788308	168.519	1.98494	167.019	2.33133	145.839	21.8465	168.519	1.98494	100.898
-Spot 23	130.54	60478.8	3.59004	19.862	1.57973	0.18412	1.90838	0.0265346	1.07069	0.561047	168.823	1.78411	171.6	3.01302	210.049	36.6349	168.823	1.78411	98.3819
-Spot 212	104.628	107368	3.04614	19.8845	2.06683	0.184209	2.24492	0.0265774	0.876294	0.390344	169.092	1.46248	171.676	3.54582	207.421	47.9248	169.092	1.46248	98.4947
-Spot 142	110.13	85858.4	2.75237	20.447	1.28207	0.179312	1.60695	0.0266028	0.968813	0.602888	169.251	1.61839	167.469	2.48094	142.328	30.0735	169.251	1.61839	101.064
-Spot 4	311.386	341617	1.51251	20.1444	1.20769	0.18211	1.3928	0.026618	0.693807	0.498138	169.347	1.15964	169.874	2.17869	177.207	28.161	169.347	1.15964	99.6894
-Spot 83	250.668	14365.5	2.99333	20.7232	1.36887	0.177596	1.75867	0.026704	1.10414	0.627828	169.887	1.85129	165.99	2.6931	110.782	32.3394	169.887	1.85129	102.348
-Spot 104	457.071	45796.8	2.09864	20.4588	0.733812	0.180602	1.19318	0.0268097	0.940845	0.788521	170.55	1.58357	168.579	1.85334	141.001	17.2388	170.55	1.58357	101.169
-Spot 12	158.786	65593.6	2.28339	20.4476	1.33328	0.180785	1.7374	0.0268221	1.11397	0.641168	170.628	1.8758	168.736	2.70098	142.259	31.2934	170.628	1.8758	101.121
-Spot 16	385.898	39084.1	2.54799	20.2293	0.900871	0.183077	1.38512	0.0268722	1.05213	0.759598	170.943	1.77491	170.705	2.1764	167.394	21.0233	170.943	1.77491	100.139
-Spot 220	104.901	5606.44	1.98864	19.3277	1.63795	0.19224	1.92036	0.0269595	1.00245	0.522013	171.491	1.69645	178.539	3.14408	272.881	37.5272	171.491	1.69645	96.0523
-Spot 130	179.496	42601.3	3.30166	20.4761	1.17617	0.182068	1.7297	0.0270501	1.26827	0.733228	172.059	2.15331	169.838	2.70516	139.027	27.6013	172.059	2.15331	101.308
-Spot 120	397.406	659479	2.85226	20.1444	0.88398	0.187456	1.41814	0.0273994	1.10892	0.781953	174.252	1.90643	174.456	2.27317	177.209	20.6157	174.252	1.90643	99.8827
-Spot 24	319.956	299542	2.209	19.8241	1.33208	0.190578	1.66855	0.0274128	1.00479	0.602196	174.336	1.72824	177.122	2.71197	214.458	30.862	174.336	1.72824	98.4267
-Spot 56	142.609	163908	2.67761	19.0306	1.25107	0.198793	1.87337	0.0274499	1.3944	0.744325	174.569	2.40151	184.105	3.15437	308.317	28.4776	174.569	2.40151	94.8203
-Spot 49	382.528	45846.8	2.38175	20.1591	1.00082	0.187709	1.46483	0.0274564	1.06962	0.730203	174.609	1.84259	174.673	2.35068	175.506	23.3285	174.609	1.84259	99.9638
-Spot 11	263.748	129129	131.313	18.7876	0.941461	0.319129	1.2755	0.0435037	0.860554	0.674679	274.514	2.31275	281.233	3.13322	337.461	21.3293	274.514	2.31275	97.6109
-Spot 147	161.798	32861.1	57.3485	19.1075	1.27806	0.336223	2.11695	0.0466142	1.68761	0.79719	293.701	4.84531	294.305	5.40869	299.083	29.1536	293.701	4.84531	99.7946
-Spot 137	40.5497	52237.1	102.756	17.854	1.89232	0.387544	2.01085	0.0502048	0.680199	0.338263	315.779	2.09616	332.574	5.70282	451.769	42.0357	315.779	2.09616	94.9499
-Spot 29	40.6979	173827	99.7427	18.1928	1.46517	0.428309	1.89298	0.0565386	1.1986	0.633181	354.54	4.13478	361.975	5.76389	409.877	32.7731	354.54	4.13478	97.946
-Spot 47	243.005	105333	3.11305	18.4027	1.04736	0.441355	1.54218	0.0589329	1.13197	0.734008	369.133	4.06111	371.207	4.79497	384.158	23.5328	369.133	4.06111	99.4411
-Spot 100	77.2876	11157.7	2.82383	18.5642	1.17604	0.470204	1.35943	0.063336	0.68189	0.501601	395.882	2.61826	391.33	4.41466	364.496	26.5157	395.882	2.61826	101.163
-Spot 127	56.3437	63090.1	2.09075	17.854	1.40799	0.492319	1.74872	0.0637777	1.0371	0.593065	398.559	4.00828	406.49	5.85786	451.776	31.2873	398.559	4.00828	98.049
-Spot 52	208.169	25542.1	1.77262	18.3077	0.765284	0.484101	1.13771	0.064307	0.841856	0.739958	401.766	3.27905	400.883	3.76822	395.776	17.1595	401.766	3.27905	101.513
-Spot 146	181.065	219317	5.38114	9.39817	0.639893	4.52537	1.13814	0.308593	0.941219	0.826982	1733.78	14.3084	1735.65	9.4652	1737.88	11.7312	1737.88	11.7312	99.7637
-Spot 218	25.2965	3639.05	4.55085	17.6899	1.86637	0.718831	2.18446	0.0922659	1.13514	0.519642	568.924	6.18129	549.977	9.2764	472.246	41.2994	568.924	6.18129	120.472	*REV DISCORD
-Spot 207	53.5704	14884.5	3.80439	15.0881	1.63612	0.599274	1.85158	0.0656066	0.866851	0.468169	409.633	3.44044	476.773	7.04499	814.258	34.2251	409.633	3.44044	50.3075	*discord

## Sheet: DCOH-02 datatable 5-2019
Table _____. U-Pb geochronologic analyses.
DCOH-02	Lowden Ranch						Isotope ratios						Apparent ages (Ma)
Analysis	U	206Pb	U/Th	206Pb*	±	207Pb*	±	206Pb*	±	error	206Pb*	±	207Pb*	±	206Pb*	±	Best age	±	Conc
	(ppm)	204Pb		207Pb*	(%)	235U*	(%)	238U	(%)	corr.	238U*	(Ma)	235U	(Ma)	207Pb*	(Ma)	(Ma)	(Ma)	(%)
-Spot 110	126.427	169642	1.76441	18.9102	2.1585	0.15044	2.3173	0.0206418	0.843058	0.363811	131.711	1.09913	142.301	3.0769	322.747	49.0334	131.711	1.09913	92.5584
-Spot 14	83.966	2519.41	1.72344	21.2499	5.45984	0.134507	5.55975	0.020739	1.04925	0.188723	132.325	1.37426	128.139	6.69312	51.2025	130.397	132.325	1.37426	103.266
-Spot 3 r1	80.4002	7441.84	2.86652	20.5416	2.89293	0.139666	3.01254	0.0208168	0.840452	0.278985	132.816	1.10483	132.747	3.74868	131.527	68.0533	132.816	1.10483	100.052
-Spot 39	344.546	50656.1	2.02791	19.692	1.15093	0.145767	1.50571	0.0208274	0.970826	0.644765	132.883	1.27686	138.167	1.94506	229.921	26.5989	132.883	1.27686	96.1757
-Spot 6	74.279	4296.4	2.39554	19.2591	2.53113	0.149503	2.69331	0.0208918	0.920472	0.341763	133.289	1.21429	141.473	3.55679	281.064	57.9523	133.289	1.21429	94.2154
-Spot 35	314.283	336414	1.75415	19.5848	1.4354	0.147393	1.63786	0.0209452	0.788806	0.481608	133.627	1.04321	139.607	2.13635	242.513	33.0651	133.627	1.04321	95.716
-Spot 37	46.8441	2209.25	2.19958	19.9144	2.95209	0.14506	3.21	0.0209606	1.26068	0.392733	133.724	1.66846	137.541	4.12912	203.92	68.5186	133.724	1.66846	97.2248
-Spot 25	56.328	7403.18	2.50739	19.8274	3.46819	0.145792	3.72094	0.0209743	1.34798	0.362269	133.811	1.78515	138.19	4.80745	214.12	80.3576	133.811	1.78515	96.8309
-Spot 60	71.3171	2040.48	4.40545	22.5359	2.56953	0.128336	2.76217	0.020985	1.01345	0.366903	133.878	1.34279	122.601	3.18999	NA	NA	133.878	1.34279	109.198
-Spot 62	88.3431	16603.8	2.45165	19.2737	2.36933	0.150231	2.57923	0.0210094	1.01918	0.395148	134.032	1.35193	142.116	3.42056	279.331	54.2429	134.032	1.35193	94.3118
-Spot 30	131.924	17557.7	1.72624	19.7586	2.11017	0.146664	2.31984	0.0210265	0.963777	0.415449	134.14	1.27945	138.962	3.01284	222.143	48.8107	134.14	1.27945	96.5301
-Spot 10	740.168	23416.3	2.12211	20.3636	1.01211	0.142491	1.42673	0.0210539	1.00558	0.704816	134.313	1.33666	135.26	1.80679	151.932	23.6899	134.313	1.33666	99.2995
-Spot 33	62.7396	13693.2	2.42617	20.1484	2.69271	0.144539	2.93235	0.0211306	1.16102	0.395934	134.798	1.54877	137.079	3.76012	176.75	62.8264	134.798	1.54877	98.3359
-Spot 21	188.371	985410	1.79609	20.0329	1.47847	0.145632	1.64904	0.0211684	0.730382	0.442913	135.036	0.976021	138.048	2.1285	190.184	34.4083	135.036	0.976021	97.8182
-Spot 17 c2	142.673	6475.62	1.65211	20.787	1.85765	0.140379	2.07906	0.0211729	0.933618	0.449057	135.065	1.24787	133.381	2.59867	103.499	43.9356	135.065	1.24787	101.262
-Spot 2 c1	110.068	51122.4	1.83125	18.991	2.15972	0.153656	2.31163	0.021173	0.824153	0.356525	135.065	1.10156	145.134	3.12623	313.036	49.1245	135.065	1.10156	93.0622
-Spot 36	490.606	15833.7	2.24812	19.6356	1.14247	0.148654	1.61437	0.0211792	1.1406	0.706528	135.104	1.52496	140.723	2.1214	236.55	26.3459	135.104	1.52496	96.0072
-Spot 9	196.917	4264.64	1.85715	21.1505	2.31973	0.138097	2.46052	0.021193	0.82037	0.333413	135.191	1.09752	131.348	3.03154	62.392	55.2581	135.191	1.09752	102.926
-Spot 63	92.6584	7730.19	1.63439	20.8837	2.29018	0.140238	2.52056	0.0212501	1.05276	0.41767	135.552	1.41214	133.256	3.14774	92.5217	54.2677	135.552	1.41214	101.723
-Spot 108	125.522	17923.6	1.76162	19.9484	1.72894	0.14684	1.9465	0.021254	0.894229	0.459403	135.576	1.19971	139.118	2.53063	199.962	40.1371	135.576	1.19971	97.4541
-Spot 51 c3	169.604	16839.7	1.81914	20.0281	2.11159	0.146704	2.41445	0.0213192	1.17079	0.484909	135.988	1.57546	138.998	3.13647	190.737	49.1287	135.988	1.57546	97.8345
-Spot 11	318.332	130398	2.27574	19.5179	1.99986	0.150552	2.22819	0.0213211	0.982538	0.440958	136	1.32225	142.399	2.96049	250.39	46.0206	136	1.32225	95.5058
-Spot 18	136.086	7368.23	2.19254	21.5093	2.28707	0.136639	2.45491	0.021325	0.892151	0.363414	136.024	1.20083	130.046	2.99653	22.1506	54.8803	136.024	1.20083	104.597
-Spot 24	147.227	8679.36	2.40911	20.85	2.33419	0.141205	2.59589	0.021362	1.13587	0.437564	136.258	1.53147	134.116	3.26139	96.3569	55.2469	136.258	1.53147	101.597
-Spot 32	210.959	13190.9	1.98168	20.3672	1.82732	0.144602	2.16108	0.0213694	1.15375	0.533879	136.305	1.55611	137.134	2.77218	151.508	42.8365	136.305	1.55611	99.3949
-Spot 4	461.18	117933	1.99244	20.0731	1.03667	0.146723	1.32583	0.0213699	0.826515	0.623395	136.308	1.11478	139.015	1.7225	185.468	24.1311	136.308	1.11478	98.0527
-Spot 109	86.1645	4027.2	2.1812	21.1275	2.48959	0.139504	2.79385	0.0213857	1.26788	0.45381	136.408	1.71131	132.602	3.47301	64.9475	59.2629	136.408	1.71131	102.87
-Spot 31	159.597	26743.4	1.89254	20.4694	1.94654	0.144395	2.14193	0.0214459	0.893789	0.417282	136.788	1.20971	136.951	2.74418	139.789	45.7073	136.788	1.20971	99.8807
-Spot 40	88.5953	109506	2.18895	19.6558	2.48762	0.150519	2.67594	0.0214669	0.98612	0.368513	136.92	1.33596	142.37	3.55474	234.22	57.4248	136.92	1.33596	96.1719
-Spot 23	82.6601	7342.99	2.56735	19.6218	2.81929	0.151111	3.09063	0.0215142	1.26634	0.409735	137.218	1.71928	142.893	4.11964	238.192	65.0416	137.218	1.71928	96.0289
-Spot 45	104.704	6945.1	3.03184	20.2042	2.70726	0.146765	2.97579	0.0215155	1.23534	0.41513	137.227	1.6773	139.052	3.86708	170.295	63.2217	137.227	1.6773	98.6877
-Spot 20	155.309	26147.4	1.591	20.7265	1.71123	0.143177	1.97633	0.0215321	0.988738	0.500289	137.332	1.34349	135.869	2.51334	110.367	40.4032	137.332	1.34349	101.076
-Spot 1	124.575	60099.4	2.54816	20.5547	1.80475	0.144418	2.09145	0.0215387	1.0569	0.505344	137.373	1.43654	136.971	2.67987	130.01	42.4347	137.373	1.43654	100.294
-Spot 79	68.8947	13432.4	2.10766	20.6352	2.83796	0.143858	2.98502	0.0215392	0.925398	0.310013	137.376	1.25783	136.474	3.81189	120.779	66.8797	137.376	1.25783	100.661
-Spot 15	182.146	51343	2.54996	20.358	1.59279	0.145932	1.80955	0.0215562	0.858763	0.474573	137.484	1.16816	138.313	2.33987	152.56	37.3143	137.484	1.16816	99.4002
-Spot 59	177.251	23734.8	2.58073	20.3919	1.83895	0.14582	2.13005	0.0215756	1.07488	0.504626	137.606	1.46342	138.214	2.75245	148.696	43.1354	137.606	1.46342	99.5599
-Spot 22	82.0311	2973.01	1.82334	21.194	2.92501	0.140307	3.08888	0.0215764	0.992723	0.321386	137.611	1.35162	133.317	3.85913	57.446	69.7562	137.611	1.35162	103.221
-Spot 5	444.333	28532.1	2.20102	20.602	0.991948	0.1447	1.31697	0.0216305	0.866281	0.657785	137.952	1.18236	137.222	1.69037	124.575	23.3617	137.952	1.18236	100.532
-Spot 29	231.861	9266.59	2.36572	21.046	2.16472	0.141683	2.27013	0.0216359	0.683721	0.301182	137.987	0.933419	134.542	2.86058	74.1286	51.4821	137.987	0.933419	102.56
-Spot 78	97.175	6023.67	3.11215	17.8431	2.87858	0.168237	3.0404	0.021781	0.978662	0.321886	138.902	1.34484	157.887	4.44583	453.176	63.9151	138.902	1.34484	87.9753
-Spot 52 r3	115.001	12096.2	3.18601	20.6931	2.06856	0.145326	2.4613	0.0218202	1.33381	0.541915	139.149	1.83611	137.777	3.17111	114.192	48.7904	139.149	1.83611	100.996
-Spot 61	95.5622	6125.83	1.78381	20.3157	2.51664	0.149336	2.81683	0.0220133	1.26532	0.449202	140.368	1.75691	141.326	3.71629	157.434	58.8894	140.368	1.75691	99.3221
-Spot 12	239.38	17847.8	2.6979	20.6431	1.84653	0.147594	2.02439	0.0221072	0.829742	0.409873	140.96	1.15691	139.786	2.64366	119.918	43.5221	140.96	1.15691	100.84
-Spot 13	136.123	8139.28	2.35364	20.6568	2.05412	0.150434	2.25891	0.0225474	0.939824	0.416051	143.736	1.33591	142.295	2.99927	118.342	48.4111	143.736	1.33591	101.012
-Spot 27	538.788	34676.2	2.64718	20.1374	1.23996	0.156123	2.05299	0.0228116	1.63623	0.797001	145.401	2.35247	147.303	2.815	178.019	28.9191	145.401	2.35247	98.7086
-Spot 26	279.463	684516	2.13966	19.9632	1.42546	0.15751	1.56997	0.0228153	0.657936	0.419074	145.424	0.946087	148.521	2.16923	198.274	33.1149	145.424	0.946087	97.9148
-Spot 7	242.141	16183.4	3.5631	19.6766	1.54464	0.165465	1.99022	0.0236235	1.25501	0.630589	150.516	1.86711	155.476	2.86905	231.729	35.6428	150.516	1.86711	96.8099
-Spot 19	46.4996	4320.74	3.01279	18.9387	1.97252	0.458061	2.31332	0.0629452	1.20857	0.522439	393.512	4.61361	382.909	7.37941	319.324	44.8352	393.512	4.61361	102.769
-Spot 16	898.4	244771	1.47738	18.2249	0.655109	0.479971	1.25325	0.06347	1.06839	0.852499	396.694	4.11049	398.053	4.12698	405.932	14.6635	396.694	4.11049	99.6585
-Spot 8	80.1465	124778	3.74798	17.8763	1.5003	0.493593	1.70359	0.0640227	0.807032	0.473725	400.044	3.13035	407.356	5.71657	448.999	33.3521	400.044	3.13035	89.0968

## Sheet: DCOH-02 Datatable 10-2020 
Aliquot Name	DCOH-02
Stratigraphic Formation Name	Weaverville Formation; Lowden Ranch basin
Stratigraphic Age	Miocene
Rock Type	sandy conglomerate
Mineral	Zircon
Method	U-Pb
Internal Uncertainty Level	one sigma
External Uncertainty 206/238 (% two sigma)	0.815182
External Uncertainty 206/207 (% two sigma)	0.81996
Laboratory Name	Arizona LaserChron Center
Aliquot Instrumental Method	LA-ICPMS
Aliquot Instrumental Reference	Gehrels, G.E., Valencia, V., Ruiz, J., 2008, Enhanced precision, accuracy, efficiency, and spatial resolution of U-Pb ages by laser ablation-multicollector-inductively coupled plasma-mass spectrometry: Geochemistry, Geophysics, Geosystems, v. 9, Q03017, doi:10.1029/2007GC001805.
	Gehrels, G. and Pecha, M., 2014, Detrital zircon U-Pb geochronology and Hf isotope geochemistry of Paleozoic and Triassic passive margin strata of western North America: Geosphere, v. 10 (1), p. 49-65.
							Isotope ratios						Apparent ages (Ma)
Analysis	U	206Pb	U/Th	206Pb*	±	207Pb*	±	206Pb*	±	error	206Pb*	±	207Pb*	±	206Pb*	±	Best age	±	Conc
	(ppm)	204Pb		207Pb*	(%)	235U	(%)	238U	(%)	corr.	238U	(Ma)	235U	(Ma)	207Pb*	(Ma)	(Ma)	(Ma)	(%)
DCOH02-20-129	143.108	34479	0.983916	18.0406	2.18483	0.125864	4.81703	0.0190424	4.29261	0.891131	121.601	5.17092	120.374	5.46801	96.2066	51.7514	121.601	5.17092	126.396
DCOH02-20-56	186.553	13746.9	2.12835	17.7456	2.63809	0.127873	3.97066	0.0192897	2.9659	0.746953	123.165	3.61828	122.184	4.57102	103.115	62.399	123.165	3.61828	119.444
DCOH02-20-83	123.274	86623.6	1.68193	17.8673	2.67487	0.129713	6.44857	0.0193685	5.86753	0.909896	123.664	7.18684	123.84	7.51824	127.247	62.9795	123.664	7.18684	97.1837
DCOH02-20-54	91.5632	120805	0.869228	16.512	5.37826	0.1406	10.3014	0.0194015	8.78599	0.852889	123.872	10.7795	133.578	12.8944	309.788	122.523	123.872	10.7795	39.9861
DCOH02-20-149	66.5824	21039.5	1.83455	17.9736	4.09128	0.127913	5.63058	0.0194315	3.86762	0.686895	124.062	4.75238	122.221	6.48377	86.5539	NA	124.062	4.75238	143.335
DCOH02-20-95	466.492	90688.2	1.8118	17.6452	1.01648	0.131897	1.66998	0.0194508	1.32493	0.793379	124.184	1.6296	125.801	1.97593	156.477	23.797	124.184	1.6296	79.3623
DCOH02-20-55	143.676	60459.9	2.6975	17.9816	2.75071	0.12962	5.88982	0.0195244	5.20787	0.884215	124.65	6.42923	123.756	6.86243	106.646	65.0059	124.65	6.42923	116.881
DCOH02-20-124	235.858	109952	1.84347	17.7083	2.16405	0.133923	4.79837	0.0197828	4.28261	0.892514	126.283	5.35559	127.617	5.75441	152.552	50.7111	126.283	5.35559	82.7804
DCOH02-20-59	37.9076	6669.11	2.47623	17.8616	7.44897	0.127805	11.4946	0.0198163	8.74956	0.761191	126.495	10.9599	122.123	13.2269	37.7766	NA	126.495	10.9599	334.85
DCOH02-20-158	107.116	81848.5	2.65671	17.7689	2.83439	0.133175	5.27791	0.0198311	4.45209	0.843534	126.589	5.58087	126.946	6.29827	133.629	66.6455	126.589	5.58087	94.7314
DCOH02-20-45	506.636	468059	1.40491	17.9737	1.13768	0.132956	1.73903	0.0199014	1.31523	0.7563	127.033	1.65442	126.75	2.07221	121.443	26.8168	127.033	1.65442	104.603
DCOH02-20-165	315.959	193190	1.31927	17.8246	2.21197	0.134238	2.96609	0.020025	1.97598	0.666191	127.814	2.50071	127.899	3.56441	129.469	52.0463	127.814	2.50071	98.7214
DCOH02-20-75	141.051	13893.5	1.09736	17.8183	1.78831	0.132499	1.94271	0.0200309	0.749697	0.385902	127.851	0.949055	126.34	2.30788	98.0321	42.4115	127.851	0.949055	130.418
DCOH02-20-130	236.409	115032	1.56073	17.6506	2.10362	0.137395	3.39495	0.0202319	2.66463	0.78488	129.121	3.40637	130.721	4.16414	159.881	49.228	129.121	3.40637	80.7606
DCOH02-20-62	79.7043	26480.9	2.6095	17.819	2.86382	0.135698	3.2005	0.0203569	1.42624	0.44563	129.911	1.83429	129.205	3.88293	116.227	67.5827	129.911	1.83429	111.773
DCOH02-20-170	131.991	83937.1	1.48614	17.2306	5.18093	0.141312	5.47681	0.0203944	1.77564	0.32421	130.148	2.28779	134.211	6.88554	206.743	120.22	130.148	2.28779	62.9518
DCOH02-20-64	67.2738	72574.4	1.50851	16.7684	3.86977	0.14543	4.6221	0.0203973	2.52648	0.546609	130.167	3.25566	137.869	5.95883	272.615	88.7359	130.167	3.25566	47.7474
DCOH02-20-20	38.1366	21331	2.43206	16.7369	5.82967	0.145244	9.94231	0.0204742	8.0518	0.809853	130.652	10.414	137.704	12.8039	261.075	134.028	130.652	10.414	50.044
DCOH02-20-73	79.5037	40401.7	2.1608	18.1405	4.02463	0.134726	7.75376	0.0204818	6.62681	0.854657	130.7	8.57405	128.336	9.34793	84.7387	NA	130.7	8.57405	154.239
DCOH02-20-123	271.135	122990	2.224	17.8424	1.53352	0.137709	1.82267	0.0204913	0.984971	0.5404	130.76	1.27498	131.001	2.24011	135.358	36.0319	130.76	1.27498	96.6031
DCOH02-20-25	69.7144	15154.6	1.49111	17.6298	2.88229	0.137343	3.30886	0.0205229	1.62336	0.49061	130.96	2.1045	130.675	4.0572	125.471	67.916	130.96	2.1045	104.375
DCOH02-20-5	71.3309	20303.9	1.83498	18.3483	4.21812	0.132823	5.30077	0.0205479	3.20899	0.605382	131.118	4.16506	126.631	6.31083	43.2016	NA	131.118	4.16506	303.503
DCOH02-20-159	327.817	245275	1.71547	17.5728	0.681867	0.140196	2.21768	0.0206024	2.11015	0.95151	131.462	2.74595	133.219	2.76877	164.627	15.9451	131.462	2.74595	79.8546
DCOH02-20-183	90.318	8335.73	1.50532	14.1691	2.83189	0.170336	3.95726	0.0206396	2.76103	0.697713	131.697	3.5993	159.71	5.84823	598.364	61.4042	131.697	3.5993	22.0095
DCOH02-20-169	367.325	160300	1.65112	17.752	1.54022	0.139035	1.90994	0.0206489	1.12909	0.591165	131.755	1.47254	132.184	2.36721	139.873	36.1697	131.755	1.47254	94.1966
DCOH02-20-47	63.3656	176968	2.42323	18.2251	3.9495	0.135883	4.32232	0.0206533	1.756	0.406264	131.784	2.29063	129.371	5.25029	85.2964	NA	131.784	2.29063	154.501
DCOH02-20-31	141.604	56188.4	2.51018	17.9774	2.15189	0.137779	2.36254	0.0207133	0.974324	0.412406	132.162	1.27458	131.064	2.90493	111.177	50.8161	132.162	1.27458	118.876
DCOH02-20-162	53.1625	15026.8	3.13815	14.4143	21.4157	0.169836	21.4843	0.0207543	1.70523	0.0793708	132.422	2.23506	159.276	31.6809	579.93	470.175	132.422	2.23506	22.8341
DCOH02-20-142	73.1222	17053.6	2.44009	18.2077	4.04769	0.135114	5.19115	0.0208172	3.24778	0.625638	132.819	4.26952	128.682	6.2742	52.9528	NA	132.819	4.26952	250.825
DCOH02-20-40	108.865	45376.3	2.27668	18.0732	2.0515	0.137795	2.46383	0.0208369	1.36308	0.553236	132.943	1.79357	131.078	3.02978	97.3707	48.6017	132.943	1.79357	136.533
DCOH02-20-15	154.199	285312	1.99302	17.9657	1.91671	0.139242	2.37048	0.0208375	1.39471	0.588368	132.947	1.83523	132.369	2.94186	122.024	45.1593	132.947	1.83523	108.951
DCOH02-20-128	307.408	69554.6	2.23923	18.1104	1.59342	0.137784	2.56335	0.0208456	2.00776	0.783255	132.998	2.64292	131.068	3.15194	96.2157	37.7146	132.998	2.64292	138.229
DCOH02-20-18	77.8784	19501.6	1.49914	17.6591	3.44854	0.140121	5.38311	0.0208785	4.13232	0.767644	133.206	5.448	133.151	6.71771	132.187	81.1477	133.206	5.448	100.771
DCOH02-20-26	124.396	63449.7	1.84122	17.8929	2.53916	0.139513	2.71416	0.020885	0.95725	0.352687	133.246	1.26241	132.61	3.37414	121.247	59.8459	133.246	1.26241	109.897
DCOH02-20-84	72.7665	21788.9	1.74965	18.1774	5.31963	0.136267	5.4007	0.0208977	0.925575	0.171381	133.327	1.22136	129.713	6.57652	64.0046	NA	133.327	1.22136	208.308
DCOH02-20-110	60.9348	15914.1	2.0653	17.9812	2.47838	0.137048	2.70845	0.020901	1.07955	0.398586	133.347	1.42477	130.412	3.31473	77.2218	58.9937	133.347	1.42477	172.681
DCOH02-20-181	95.4038	240194	1.36657	17.7176	2.31962	0.141354	3.71681	0.0209172	2.90407	0.781333	133.45	3.83565	134.249	4.67403	148.389	54.3716	133.45	3.83565	89.9329
DCOH02-20-96	142.517	189575	1.58962	17.9502	2.31841	0.139718	2.39871	0.0209298	0.61497	0.256375	133.529	0.812719	132.793	2.98582	119.633	54.6483	133.529	0.812719	111.616
DCOH02-20-136	36.0558	9720.75	2.87531	16.9324	3.08055	0.144736	3.39776	0.0209327	1.42331	0.418897	133.548	1.88125	137.254	4.36212	201.83	71.6327	133.548	1.88125	66.1687
DCOH02-20-140	90.1214	17779.2	1.51119	17.9247	2.48621	0.138211	2.76202	0.0209349	1.19906	0.434125	133.562	1.58501	131.449	3.40548	93.4128	58.933	133.562	1.58501	142.98
DCOH02-20-144	199.697	36050.2	1.36789	17.3037	2.73214	0.144312	3.18677	0.0209468	1.64023	0.5147	133.637	2.16939	136.877	4.08075	193.473	63.5246	133.637	2.16939	69.0726
DCOH02-20-125	111.959	94633.5	2.57328	18.0176	3.03316	0.139424	4.80698	0.0209574	3.72916	0.775781	133.704	4.93467	132.53	5.97253	111.551	71.5872	133.704	4.93467	119.858
DCOH02-20-105	133.824	30393.1	1.90937	17.9863	3.83742	0.138615	5.71219	0.0209808	4.23085	0.740671	133.852	5.60469	131.809	7.0611	95.1589	90.8946	133.852	5.60469	140.661
DCOH02-20-104	49.962	20715.2	2.45636	18.4443	4.26591	0.13477	4.59793	0.0210115	1.71043	0.371999	134.045	2.26907	128.375	5.54477	24.6386	NA	134.045	2.26907	544.046
DCOH02-20-113	77.9638	62359	1.32594	17.8758	3.80579	0.1406	4.07413	0.0210282	1.45241	0.356496	134.151	1.92828	133.578	5.0994	123.384	89.6833	134.151	1.92828	108.726
DCOH02-20-120	136.718	37444.9	2.50756	17.8436	3.08932	0.140641	3.72302	0.0210428	2.0769	0.557853	134.243	2.75926	133.615	4.66114	122.448	72.8034	134.243	2.75926	109.633
DCOH02-20-3	53.7658	21162.8	1.85203	17.4618	2.63917	0.14291	3.18612	0.0210441	1.78253	0.559467	134.251	2.36832	135.632	4.04524	159.869	61.8055	134.251	2.36832	83.9761
DCOH02-20-171	145.702	34487.4	1.57664	17.5383	2.60759	0.142669	2.7148	0.0210515	0.752142	0.277053	134.298	0.999664	135.418	3.44174	155.128	61.0935	134.298	0.999664	86.5723
DCOH02-20-122	48.2114	16102.7	2.22545	17.7878	5.31642	0.140024	5.35321	0.0210679	0.610531	0.114049	134.402	0.812069	133.065	6.67633	109.29	NA	134.402	0.812069	122.977
DCOH02-20-119	125.479	43481.8	2.24185	18.0009	2.73299	0.139713	3.1616	0.0210688	1.58899	0.502588	134.407	2.1136	132.788	3.93533	103.939	64.5963	134.407	2.1136	129.314
DCOH02-20-109	84.9694	341947	2.52975	17.9986	4.22543	0.140286	4.45199	0.0210778	1.40208	0.314933	134.464	1.86576	133.298	5.56145	112.588	99.7595	134.464	1.86576	119.431
DCOH02-20-94	68.0573	93482	1.61198	18.033	3.45456	0.139863	3.49373	0.0210784	0.519039	0.148563	134.468	0.69071	132.922	4.35283	105.36	81.6567	134.468	0.69071	127.627
DCOH02-20-12	73.5845	29993.3	2.47714	17.7111	3.66325	0.141862	3.75279	0.0210791	0.810491	0.21597	134.472	1.07859	134.701	4.73412	138.726	86.0806	134.472	1.07859	96.9335
DCOH02-20-77	67.6044	37577.8	2.23163	17.8756	4.90887	0.140725	5.13595	0.0210847	1.50861	0.293735	134.508	2.00817	133.689	6.43349	119.2	115.765	134.508	2.00817	112.842
DCOH02-20-70	76.7598	21402.6	1.55911	18.087	2.32883	0.138155	2.8901	0.0210874	1.70978	0.591599	134.524	2.27624	131.399	3.56213	75.2342	55.4026	134.524	2.27624	178.807
DCOH02-20-21	140.963	25189	2.40752	17.8924	2.93224	0.140038	2.97976	0.0210955	0.519464	0.174331	134.576	0.691826	133.078	3.71655	106.401	69.3368	134.576	0.691826	126.479
DCOH02-20-65	95.3508	2922.09	2.1376	10.8176	26.549	0.221844	26.7381	0.0210965	3.16674	0.118436	134.582	4.21769	203.444	49.3326	1102.11	540.314	134.582	4.21769	12.2113
DCOH02-20-17	77.5799	44655	1.99876	18.1031	2.81218	0.139166	2.94732	0.0211016	0.878453	0.298052	134.615	1.17026	132.3	3.65598	90.9342	66.6797	134.615	1.17026	148.035
DCOH02-20-10	117.713	24821.6	2.3314	17.8185	1.41228	0.140892	2.74255	0.0211097	2.34867	0.856381	134.666	3.13005	133.838	3.43896	119.195	33.3739	134.666	3.13005	112.98
DCOH02-20-39	74.9281	25192.7	1.882	17.8363	3.37097	0.140945	3.53337	0.02113	1.05679	0.299088	134.794	1.40969	133.885	4.43206	117.791	79.5025	134.794	1.40969	114.435
DCOH02-20-164	246.051	195296	2.26125	17.8873	2.51954	0.141367	3.80459	0.0211706	2.85069	0.749277	135.05	3.80981	134.261	4.7848	120.334	59.3818	135.05	3.80981	112.229
DCOH02-20-79	90.7918	240436	2.72544	17.9249	1.9336	0.141746	2.96935	0.0211714	2.25339	0.758884	135.055	3.01167	134.598	3.74313	126.56	45.5206	135.055	3.01167	106.712
DCOH02-20-121	56.7703	17520.9	1.99408	18.2982	4.40972	0.13691	5.11876	0.0211723	2.59314	0.506595	135.06	3.46587	130.288	6.25905	44.1181	NA	135.06	3.46587	306.134
DCOH02-20-139	37.1057	15698.4	2.14973	18.0707	3.01204	0.138432	3.36657	0.0211844	1.49754	0.444825	135.137	2.00266	131.647	4.15672	69.0935	NA	135.137	2.00266	195.586
DCOH02-20-102	193.741	47681.1	2.44858	17.7997	1.35651	0.14193	3.16797	0.0211926	2.86246	0.903565	135.189	3.82943	134.762	3.99805	127.269	31.946	135.189	3.82943	106.223
DCOH02-20-89	91.356	22808.7	2.40129	18.0392	2.63777	0.139363	3.94645	0.0211961	2.93508	0.743728	135.211	3.92722	132.476	4.90145	83.6946	62.6148	135.211	3.92722	161.553
DCOH02-20-132	73.9188	31221.1	2.294	17.931	3.87049	0.140869	4.14739	0.0212023	1.48767	0.358701	135.25	1.99112	133.818	5.19983	108.457	91.477	135.25	1.99112	124.704
DCOH02-20-118	69.3479	19086.9	2.20628	17.9138	1.6496	0.140201	1.97728	0.0212036	1.07979	0.546101	135.258	1.44529	133.223	2.46871	97.0706	39.2061	135.258	1.44529	139.34
DCOH02-20-71	339.774	517085	1.02277	18.0272	1.37549	0.141219	1.67674	0.0212292	0.958878	0.571869	135.42	1.28497	134.129	2.10679	111.363	32.4804	135.42	1.28497	121.602
DCOH02-20-76	76.0835	30822.5	1.60904	17.5936	3.10759	0.143882	3.6716	0.0212519	1.95308	0.531942	135.563	2.62	136.495	4.68935	152.742	72.8544	135.563	2.62	88.7527
DCOH02-20-91	120.888	95977.7	1.82777	17.9095	2.13726	0.142123	2.20662	0.0212657	0.547137	0.247952	135.65	0.734439	134.933	2.78812	122.327	50.3517	135.65	0.734439	110.892
DCOH02-20-13	123.344	250816	2.42094	17.8829	2.81929	0.142793	3.34982	0.0212729	1.80897	0.540022	135.696	2.42904	135.528	4.25003	132.574	66.3126	135.696	2.42904	102.355
DCOH02-20-154	37.129	9096.3	1.89205	17.9723	3.15888	0.13777	3.29923	0.021287	0.924751	0.280293	135.784	1.24254	131.055	4.05643	46.1706	NA	135.784	1.24254	294.093
DCOH02-20-8	64.945	19472.1	1.7132	17.9285	4.07051	0.140826	4.26707	0.0212924	1.27614	0.299066	135.819	1.71511	133.779	5.34843	97.7345	96.4047	135.819	1.71511	138.967
DCOH02-20-115	37.7073	9401.69	3.13632	17.8895	3.29727	0.138932	3.9864	0.0212949	2.22606	0.558412	135.834	2.99211	132.092	4.93764	65.3072	NA	135.834	2.99211	207.993
DCOH02-20-67	45.9523	36219.2	2.21511	18.0537	2.75075	0.140513	2.88914	0.021299	0.875286	0.302958	135.86	1.17672	133.5	3.61422	91.7113	65.2587	135.86	1.17672	148.139
DCOH02-20-30	189.438	194924	1.86049	17.8566	1.1523	0.14316	1.44975	0.0213062	0.879558	0.606698	135.906	1.18286	135.855	1.84348	134.987	27.0981	135.906	1.18286	100.681
DCOH02-20-46	188.981	33711.1	1.81845	18.0302	1.83496	0.140807	1.91723	0.0213075	0.55485	0.289403	135.914	0.746225	133.762	2.40279	95.7268	43.4514	135.914	0.746225	141.981
DCOH02-20-33	304.621	421675	1.7996	17.8763	0.980466	0.143268	1.44796	0.0213194	1.06543	0.735815	135.989	1.43369	135.951	1.84242	135.304	23.0492	135.989	1.43369	100.506
DCOH02-20-103	91.9336	20040.9	1.51001	18.1933	3.54368	0.138679	3.67187	0.021332	0.956217	0.260417	136.068	1.28747	131.867	4.54078	56.8453	NA	136.068	1.28747	239.366
DCOH02-20-57	96.9212	21902.7	2.20967	17.8245	2.67324	0.142034	2.91827	0.0213693	1.16858	0.400435	136.304	1.5761	134.854	3.68528	109.363	63.1503	136.304	1.5761	124.635
DCOH02-20-179	171.723	396695	2.88427	17.8959	2.49582	0.143155	3.54882	0.0213885	2.52285	0.7109	136.425	3.40564	135.85	4.5125	125.781	58.7423	136.425	3.40564	108.463
DCOH02-20-42	123.483	41024.9	2.09279	17.707	2.28137	0.144307	3.28722	0.0213962	2.36612	0.719793	136.474	3.19519	136.873	4.20925	143.797	53.5504	136.474	3.19519	94.9074
DCOH02-20-175	63.3405	17534.5	1.84313	17.9946	3.9162	0.140197	4.22368	0.0213972	1.5805	0.3742	136.48	2.1344	133.219	5.27332	75.4415	NA	136.48	2.1344	180.908
DCOH02-20-87	131.534	29250.6	2.14345	17.8193	1.69343	0.142847	1.99115	0.0214026	1.04429	0.524466	136.515	1.41062	135.576	2.52707	119.198	39.9782	136.515	1.41062	114.527
DCOH02-20-9	514.331	277069	2.09983	17.9785	1.56018	0.143271	1.76224	0.0214521	0.819275	0.464907	136.827	1.10918	135.953	2.24235	120.718	36.7752	136.827	1.10918	113.344
DCOH02-20-131	294.928	728342	1.0159	18.0832	2.07333	0.142663	2.45354	0.021482	1.31193	0.534708	137.015	1.77858	135.413	3.11041	107.419	48.9733	137.015	1.77858	127.552
DCOH02-20-135	323.266	69746.8	1.93179	17.7733	2.07034	0.144872	2.44097	0.0215154	1.29288	0.529659	137.226	1.75542	137.374	3.13632	139.941	48.5965	137.226	1.75542	98.06
DCOH02-20-60	228.175	1.34223e+06	1.54472	17.7777	2.61559	0.145228	5.99957	0.0215376	5.3994	0.899965	137.366	7.33848	137.69	7.72533	143.293	61.4065	137.366	7.33848	95.8635
DCOH02-20-134	140.706	89374.3	1.69364	17.5406	2.65356	0.14753	3.13565	0.0216047	1.67043	0.532723	137.79	2.27726	139.729	4.09332	172.772	61.9414	137.79	2.27726	79.7522
DCOH02-20-61	94.3772	34385.4	2.08864	17.8634	2.58018	0.14405	3.18239	0.0216147	1.86153	0.584948	137.853	2.53893	136.644	4.06867	115.716	60.8877	137.853	2.53893	119.131
DCOH02-20-34	230.045	26413.7	3.40418	17.2824	3.20157	0.148929	4.43097	0.0216183	3.06259	0.691177	137.875	4.17772	140.966	5.83203	193.34	74.4706	137.875	4.17772	71.3125
DCOH02-20-108	111.54	21117.9	1.96132	16.3486	8.08366	0.15687	8.79928	0.0216355	3.47294	0.394685	137.984	4.74118	147.96	12.1159	310.983	184.306	137.984	4.74118	44.3702
DCOH02-20-114	38.7227	13124.1	2.2513	18.227	7.8634	0.139661	8.01346	0.0216491	1.52832	0.19072	138.07	2.08772	132.742	9.97159	38.4007	NA	138.07	2.08772	359.55
DCOH02-20-14	163.613	56473.1	2.19792	17.8979	2.60391	0.144681	2.92712	0.0216499	1.33663	0.456637	138.075	1.82593	137.204	3.75664	122.18	61.3436	138.075	1.82593	113.009
DCOH02-20-32	88.2001	58581.6	2.19331	17.7212	3.41619	0.146208	3.47591	0.0216533	0.638993	0.183835	138.097	0.873043	138.558	4.50204	146.502	80.17	138.097	0.873043	94.2624
DCOH02-20-117	471.674	417298	1.05214	17.7152	0.783551	0.146798	1.3401	0.0216674	1.08712	0.811229	138.185	1.48626	139.08	1.7418	154.366	18.3344	138.185	1.48626	89.5181
DCOH02-20-168	342.213	319201	1.00362	17.8644	1.15043	0.145076	1.85928	0.0216744	1.46058	0.785563	138.229	1.99746	137.555	2.39187	125.913	27.089	138.229	1.99746	109.782
DCOH02-20-98	82.0338	40835.2	1.33499	18.1223	4.06427	0.14253	4.3185	0.0216904	1.45907	0.337866	138.331	1.99684	135.295	5.47023	82.3052	NA	138.331	1.99684	168.07
DCOH02-20-68	61.0405	3789.92	1.70466	10.7797	19.9765	0.231967	20.038	0.021705	1.5579	0.0777472	138.423	2.1335	211.821	38.3281	1134.35	401.524	138.423	2.1335	12.2028
DCOH02-20-4	131.582	54396.6	1.7592	17.3915	2.52559	0.149383	2.72753	0.0217055	1.02896	0.377248	138.426	1.40916	141.367	3.59945	191.045	58.7647	138.426	1.40916	72.4574
DCOH02-20-141	49.0923	16508.5	2.11107	18.2125	2.349	0.140898	2.68104	0.0217257	1.28939	0.48093	138.553	1.76743	133.844	3.36196	51.0781	NA	138.553	1.76743	271.257
DCOH02-20-88	115.054	124648	2.4268	17.8455	1.95463	0.145902	2.22704	0.0217432	1.06652	0.478895	138.663	1.46307	138.287	2.87921	131.847	45.9547	138.663	1.46307	105.17
DCOH02-20-23	102.663	30072.1	2.16091	17.5217	3.98508	0.148227	4.63633	0.0218251	2.36911	0.510989	139.18	3.26199	140.346	6.07729	160.111	93.2393	139.18	3.26199	86.9271
DCOH02-20-49	300.626	166921	2.27353	17.896	0.858415	0.14612	1.6772	0.0218276	1.44082	0.859061	139.196	1.98406	138.481	2.17118	126.257	20.2322	139.196	1.98406	110.248
DCOH02-20-7	73.8357	15763.1	1.81983	15.4368	8.19893	0.167783	8.24107	0.021858	0.824364	0.100031	139.388	1.13673	157.493	12.0232	439.288	182.736	139.388	1.13673	31.7304
DCOH02-20-166	292.172	55411	1.68546	17.5271	1.67725	0.148805	2.1387	0.0218948	1.32668	0.620323	139.62	1.8324	140.856	2.81288	161.756	39.2538	139.62	1.8324	86.3148
DCOH02-20-97	94.685	73013.3	1.5284	17.7494	3.82537	0.147511	3.99163	0.0218975	1.13922	0.285403	139.637	1.57367	139.712	5.21018	141.009	89.8365	139.637	1.57367	99.0275
DCOH02-20-43	346.4	31179.1	2.32041	16.8543	3.0178	0.155489	3.65894	0.0219786	2.06826	0.565263	140.149	2.86736	146.747	4.99946	254.772	69.4341	140.149	2.86736	55.0095
DCOH02-20-138	72.6895	14660.4	1.92612	17.7982	2.16044	0.145839	2.21074	0.0219983	0.461435	0.208724	140.273	0.640278	138.231	2.85705	103.28	51.1325	140.273	0.640278	135.818
DCOH02-20-50	210.396	88357.3	2.76318	17.9627	2.00484	0.146519	2.37755	0.0219996	1.27768	0.537393	140.281	1.77298	138.833	3.08512	114.152	47.3319	140.281	1.77298	122.89
DCOH02-20-1	46.8904	15183	2.44957	18.2988	5.18355	0.142028	5.38857	0.0220418	1.46358	0.271608	140.547	2.03476	134.849	6.80467	35.596	NA	140.547	2.03476	394.84
DCOH02-20-137	163.673	38604.5	6.03609	17.8374	3.34322	0.147537	4.61772	0.0220566	3.18473	0.689676	140.641	4.43052	139.735	6.02832	124.351	78.7538	140.641	4.43052	113.1
DCOH02-20-28	200.64	80928.6	1.37059	18.0139	2.337	0.146572	2.57773	0.0220594	1.08728	0.421797	140.658	1.51278	138.881	3.34595	108.592	55.2046	140.658	1.51278	129.529
DCOH02-20-78	100.652	108600	2.14396	17.6961	3.67952	0.1498	4.00996	0.0221172	1.59357	0.397403	141.023	2.22289	141.735	5.30472	153.675	86.1839	141.023	2.22289	91.7666
DCOH02-20-81	138.759	80473.3	2.52563	18.0742	3.49451	0.146454	3.79194	0.0221275	1.47139	0.38803	141.087	2.05339	138.776	4.91858	99.4333	82.701	141.087	2.05339	141.892
DCOH02-20-35	91.8441	38696.2	1.8874	17.5728	1.90773	0.150697	2.19228	0.0221772	1.07573	0.490689	141.401	1.50453	142.527	2.91521	161.314	44.6756	141.401	1.50453	87.6561
DCOH02-20-160	48.7833	20961.6	1.85526	15.5061	7.41228	0.169912	7.45249	0.0222475	0.763475	0.102446	141.845	1.07112	159.342	10.9905	428.019	165.487	141.845	1.07112	33.1398
DCOH02-20-116	269.679	14202.2	1.66492	15.1463	4.88703	0.1737	9.92493	0.0222566	8.6381	0.870344	141.902	12.1237	162.625	14.9153	476.111	108.15	141.902	12.1237	29.8044
DCOH02-20-90	81.5005	138361	3.12581	18.1347	3.10546	0.147084	3.16485	0.0222716	0.608975	0.192418	141.997	0.855269	139.334	4.12056	94.2297	73.5541	141.997	0.855269	150.692
DCOH02-20-74	120.812	71828.5	1.62783	17.6202	2.00519	0.151847	2.99441	0.0223553	2.22352	0.742556	142.524	3.13428	143.542	4.00826	160.371	46.9219	142.524	3.13428	88.8719
DCOH02-20-52	431.525	214794	1.90355	17.8133	1.93706	0.150446	2.26458	0.0223619	1.17303	0.51799	142.566	1.65399	142.306	3.007	137.972	45.5037	142.566	1.65399	103.33
DCOH02-20-153	97.6841	2863.74	2.3331	9.36303	21.9568	0.273416	22.3051	0.022378	3.92233	0.175849	142.668	5.53442	245.421	48.6654	1395.8	426.225	142.668	5.53442	10.2212
DCOH02-20-82	55.3299	17778.3	2.29064	17.3941	6.36417	0.152644	6.44633	0.0224423	1.02137	0.158441	143.073	1.4452	144.244	8.66839	163.529	148.941	143.073	1.4452	87.4907
DCOH02-20-16	107.886	85541.2	1.73622	17.8577	2.80483	0.150957	2.87238	0.0225027	0.618496	0.215325	143.454	0.877455	142.757	3.82532	131.209	65.9769	143.454	0.877455	109.332
DCOH02-20-133	197.324	145898	2.90164	17.5385	1.6429	0.155585	1.92876	0.0227523	1.01028	0.523796	145.027	1.44882	146.832	2.63679	176.055	38.3316	145.027	1.44882	82.376
DCOH02-20-19	311.08	170456	2.69925	17.8716	1.4761	0.153	1.81488	0.0228019	1.05581	0.581753	145.339	1.51734	144.557	2.44535	131.733	34.7147	145.339	1.51734	110.329
DCOH02-20-173	97.4448	26106.5	1.99263	15.6317	2.29326	0.175067	4.8148	0.0230525	4.23279	0.87912	146.919	6.14843	163.807	7.28378	415.401	51.3054	146.919	6.14843	35.3679
DCOH02-20-38	146.059	130826	1.84851	17.8755	2.36991	0.155254	3.51055	0.0231313	2.58971	0.737693	147.415	3.77431	146.54	4.79043	132.379	55.7357	147.415	3.77431	111.359
DCOH02-20-147	107.524	34559.2	7.25359	17.6882	2.04193	0.156935	2.38453	0.0233262	1.22913	0.515461	148.643	1.80612	148.016	3.28431	137.983	47.9933	148.643	1.80612	107.726
DCOH02-20-107	104.83	90495.2	21.4827	17.6015	1.75495	0.158841	3.88612	0.0233909	3.46705	0.892161	149.051	5.10838	149.688	5.40867	159.8	41.0828	149.051	5.10838	93.2735
DCOH02-20-126	133.986	75009.4	2.01166	15.7047	21.4915	0.17989	22.6626	0.0235748	7.19049	0.317285	150.209	10.6759	167.966	35.0976	426.061	NA	150.209	10.6759	35.2554
DCOH02-20-182	46.5085	13190.4	2.14988	15.6829	11.0809	0.182602	11.3981	0.0243104	2.66182	0.233531	154.84	4.07246	170.297	17.8721	390.796	249.402	154.84	4.07246	39.6218
DCOH02-20-53	288.481	1.46433e+06	2.67925	17.8273	1.14495	0.16542	1.40604	0.0246001	0.816101	0.580426	156.664	1.26312	155.436	2.02644	136.748	26.8944	156.664	1.26312	114.564
DCOH02-20-48	65.3396	5338.9	0.892249	14.9168	3.89632	0.192875	9.85974	0.0249651	9.05519	0.918401	158.959	14.2181	179.08	16.1888	453.648	86.6222	158.959	14.2181	35.0402
DCOH02-20-186	80.3941	2358.03	1.22653	8.59429	3.66951	0.342842	6.67441	0.0258469	5.57433	0.835178	164.503	9.05391	299.323	17.3043	1551.71	68.9512	164.503	9.05391	10.6014
DCOH02-20-99	59.649	76047.2	40.5276	16.4646	3.99563	0.188286	4.63042	0.0259452	2.33973	0.505296	165.121	3.81432	175.166	7.44999	313.031	90.9392	165.121	3.81432	52.749
DCOH02-20-167	432.83	105773	14.7727	14.3635	3.99279	0.276735	9.51299	0.0332796	8.63449	0.907652	211.042	17.9274	248.065	20.9398	614.674	86.2663	211.042	17.9274	34.3339
DCOH02-20-41	2.43338	4853.98	9.74666	16.5653	11.4391	0.299679	13.5305	0.043503	7.18726	0.531188	274.51	19.3156	266.149	31.6888	193.226	NA	274.51	19.3156	142.067
DCOH02-20-145	506.609	257421	144.234	16.4266	1.05553	0.347546	1.43987	0.0476409	0.979298	0.680131	300.021	2.87078	302.874	3.77071	324.913	23.9672	300.021	2.87078	92.3389
DCOH02-20-152	27.3441	11425.7	-95.2611	15.6704	3.37834	0.420837	6.25552	0.0561548	5.26398	0.841493	352.198	18.0423	356.649	18.8154	385.692	75.9559	352.198	18.0423	91.3159
DCOH02-20-148	133.324	25326.6	1.81745	14.9523	2.46391	0.469309	5.00084	0.0590705	4.35163	0.87018	369.97	15.6465	390.712	16.2202	515.393	54.1465	369.97	15.6465	71.7841
DCOH02-20-51	15.3228	23741.7	4.66561	15.8142	4.43904	0.467013	4.57993	0.0621491	1.12389	0.245395	388.682	4.23928	389.123	14.8052	391.726	99.6639	388.682	4.23928	99.223
DCOH02-20-72	14.9418	9065.16	3.76761	16.0019	1.80758	0.456375	2.78294	0.0624631	2.0981	0.753915	390.587	7.9516	381.734	8.85511	328.406	41.49	390.587	7.9516	118.934
DCOH02-20-44	330.16	1.81775e+06	2.08025	15.8504	0.597624	0.477978	2.12447	0.0630467	2.03868	0.959618	394.128	7.7943	396.685	6.97633	411.593	13.3638	394.128	7.7943	95.7566
DCOH02-20-146	8.23745	20502.2	5.00288	16.977	6.85566	0.440562	7.1092	0.0631406	1.86568	0.262432	394.697	7.14288	370.649	22.0797	222.899	158.806	394.697	7.14288	177.074
DCOH02-20-161	183.014	103600	1.57705	15.6857	1.25828	0.482405	2.25867	0.0633808	1.87568	0.830438	396.153	7.20688	399.722	7.46338	420.382	28.0947	396.153	7.20688	94.2365
DCOH02-20-6	448.467	280449	2.6569	15.969	0.888219	0.486907	3.82061	0.0647435	3.71592	0.972599	404.409	14.5659	402.801	12.7042	393.567	19.9244	404.409	14.5659	102.755
DCOH02-20-180	507.035	322163	1.81439	15.7762	0.676494	0.49197	0.958007	0.0648014	0.678288	0.70802	404.759	2.66102	406.252	3.20759	414.726	15.119	404.759	2.66102	97.5969
DCOH02-20-22	561.946	243107	1.72647	15.8389	0.798599	0.498371	2.16757	0.0658313	2.01508	0.929653	410.991	8.02334	410.599	7.32054	408.373	17.868	410.991	8.02334	100.641
DCOH02-20-58	95.1682	811505	20.3893	13.6604	6.85669	0.585235	10.165	0.0666937	7.50426	0.738241	416.205	30.2464	467.82	38.1224	729.777	145.456	416.205	30.2464	57.0319
DCOH02-20-24	237.915	227992	1.23156	15.7437	0.880672	0.529402	1.4196	0.0695138	1.11337	0.784286	433.226	4.66492	431.413	4.98958	421.72	19.6588	433.226	4.66492	102.728
DCOH02-20-143	545.832	2.52375e+06	14.0254	12.3711	0.580417	1.50558	3.23884	0.155158	3.18641	0.983812	929.811	27.5902	932.649	19.7638	939.342	11.898	939.342	11.898	98.9854
DCOH02-20-174	510.398	134078	61.9537	11.6708	4.34212	1.59438	4.63363	0.155581	1.61747	0.349073	932.171	14.0382	968.014	28.9219	1050.33	87.5328	1050.33	87.5328	88.7505
DCOH02-20-80	202.935	751140	4.88539	11.436	0.482821	1.9501	1.83038	0.185666	1.76555	0.964582	1097.85	17.8225	1098.48	12.2861	1099.74	9.65487	1099.74	9.65487	99.8283
DCOH02-20-176	95.4727	116385	3.72626	9.50002	0.9467	2.72344	1.81322	0.216355	1.54643	0.852867	1262.58	17.7319	1334.87	13.4672	1452.76	18.0147	1452.76	18.0147	86.9095
DCOH02-20-101	246.939	1.22872e+06	1.82767	9.39719	0.433755	3.29883	0.854223	0.258658	0.735903	0.861488	1482.97	9.74893	1480.78	6.65606	1477.62	8.22596	1477.62	8.22596	100.362
DCOH02-20-92	177.375	659352	0.826933	8.75021	0.479691	3.74379	0.687167	0.272995	0.492031	0.716027	1555.98	6.80202	1580.78	5.50659	1614.02	8.93347	1614.02	8.93347	96.4044
DCOH02-20-155	86.0025	333922	1.71711	8.59465	0.623821	4.02057	0.855037	0.288592	0.58475	0.683889	1634.49	8.44224	1638.36	6.95274	1643.33	11.5761	1643.33	11.5761	99.4623
DCOH02-20-36	71.4151	235341	1.59694	8.58285	0.466271	4.04068	0.955129	0.288653	0.833576	0.872737	1634.8	12.0366	1642.42	7.77438	1652.18	8.64283	1652.18	8.64283	98.9476
DCOH02-20-150	150.68	412186	2.50275	8.48498	0.311927	4.07675	1.7003	0.288792	1.67144	0.983028	1635.49	24.1443	1649.66	13.8647	1667.75	5.76862	1667.75	5.76862	98.0657
DCOH02-20-69	231.464	1.79167e+06	2.93413	8.14606	0.389164	4.45593	1.31517	0.302553	1.25627	0.955217	1703.96	18.8109	1722.8	10.9068	1745.76	7.12683	1745.76	7.12683	97.6054
DCOH02-20-29	201.849	608890	1.93945	7.59966	0.322211	5.38764	1.08478	0.340853	1.03582	0.954868	1890.77	16.9742	1882.89	9.29055	1874.19	5.81006	1874.19	5.81006	100.885

## Sheet: DCOH-02 datatable 1-2020
U-Pb geochronologic analyses.
DCOH-02	Lowden Ranch						Isotope ratios						Apparent ages (Ma)
Analysis	U	206Pb	U/Th	206Pb*	±	207Pb*	±	206Pb*	±	error	206Pb*	±	207Pb*	±	206Pb*	±	Best age	±	Conc
	(ppm)	204Pb		207Pb*	(%)	235U*	(%)	238U	(%)	corr.	238U*	(Ma)	235U	(Ma)	207Pb*	(Ma)	(Ma)	(Ma)	(%)
-Spot 11	421.422	1476.37	2.05727	21.2135	10.9212	0.0106541	11.0645	0.00163989	1.77444	0.160373	10.5628	0.187277	10.7608	1.18433	55.3034	261.15	10.5628	0.187277	98.1601
-Spot 106	2821.2	14725.5	2.23694	16.9707	2.47229	0.021105	2.57902	0.00259879	0.734234	0.284695	16.7311	0.122686	21.2066	0.54125	563.367	53.8542	16.7311	0.122686	78.8958
-Spot 109	128.649	5920.84	2.47055	21.3925	2.22663	0.132157	2.4838	0.0205134	1.10062	0.443118	130.9	1.42618	126.034	2.94395	35.1721	53.3203	130.9	1.42618	103.861
-Spot 71	191.432	6889.77	1.48176	19.2253	1.992	0.147652	2.23175	0.0205969	1.00631	0.450905	131.427	1.30917	139.837	2.91545	285.039	45.5708	131.427	1.30917	93.9861
-Spot 9	130.455	11951	2.37301	20.4119	1.56445	0.139105	1.86615	0.0206023	1.01736	0.545164	131.461	1.32389	132.247	2.31397	146.4	36.6918	131.461	1.32389	99.4062
-Spot 101	246.122	12515.5	1.55859	21.0952	1.10969	0.135046	1.48472	0.0206707	0.986404	0.664369	131.893	1.28778	128.622	1.79368	68.5755	26.3839	131.893	1.28778	102.543
-Spot 31	126.304	66622.5	2.19254	18.7431	2.08879	0.152216	2.23301	0.0207009	0.789498	0.353557	132.084	1.03219	143.867	2.99536	342.841	47.2626	132.084	1.03219	91.8103
-Spot 91	73.0361	4887.38	2.2115	20.4016	3.50636	0.140002	3.70602	0.0207246	1.20003	0.323805	132.234	1.57067	133.045	4.62135	147.564	82.2256	132.234	1.57067	99.3898
-Spot 68	481.694	70667	1.57917	20.685	0.987355	0.138673	1.60417	0.020813	1.26431	0.788142	132.792	1.66173	131.861	1.98368	115.143	23.2959	132.792	1.66173	100.706
-Spot 35	158.809	114833	1.50932	20.1282	1.74932	0.142645	2.10063	0.020833	1.16298	0.553634	132.918	1.52999	135.397	2.66273	179.079	40.7936	132.918	1.52999	98.169
-Spot 18	164.806	8521.24	2.05552	21.2835	1.67123	0.13512	2.03571	0.0208666	1.16236	0.570987	133.131	1.53159	128.688	2.46051	47.4116	39.9269	133.131	1.53159	103.452
-Spot 90	155.733	57856.5	2.64835	20.0871	1.57775	0.143226	1.9379	0.020875	1.12523	0.580646	133.183	1.48325	135.913	2.4652	183.85	36.727	133.183	1.48325	97.9916
-Spot 21	141.299	77988.2	2.63413	20.7815	1.69056	0.138456	2.14914	0.0208774	1.32697	0.61744	133.199	1.74937	131.668	2.65395	104.125	39.9623	133.199	1.74937	101.163
-Spot 89	158.051	5368.19	2.3131	21.3684	1.31797	0.134816	1.75022	0.0209027	1.15161	0.657983	133.358	1.51999	128.416	2.11125	37.872	31.5277	133.358	1.51999	103.848
-Spot 28	254.126	16631.8	1.63977	20.1287	1.65336	0.143203	1.95286	0.020915	1.03926	0.532172	133.436	1.37249	135.893	2.48388	179.022	38.5445	133.436	1.37249	98.1919
-Spot 8	269.333	303794	2.06405	20.0699	1.37467	0.144113	1.6848	0.0209864	0.974091	0.578162	133.887	1.29073	136.701	2.15484	185.841	32.0274	133.887	1.29073	97.9414
-Spot 53	114.135	8370.55	1.79008	21.4404	2.40326	0.134944	2.63108	0.020993	1.07095	0.407039	133.929	1.41951	128.531	3.17647	29.8195	57.6095	133.929	1.41951	104.2
-Spot 66	234.056	19039.2	2.5332	20.0107	1.77646	0.144742	2.33058	0.0210158	1.50857	0.647293	134.072	2.00169	137.259	2.99215	192.761	41.3234	134.072	2.00169	97.6784
-Spot 39	150.119	7258.62	1.57185	20.723	2.7359	0.139771	2.97394	0.0210164	1.16585	0.39202	134.076	1.54698	132.84	3.70309	110.792	64.576	134.076	1.54698	100.931
-Spot 72	104.455	16792.5	1.38894	19.8425	2.25398	0.146118	2.70976	0.0210372	1.50413	0.555077	134.208	1.99778	138.479	3.50782	212.311	52.2265	134.208	1.99778	96.9158
-Spot 80	120.626	9579.65	1.64838	19.9431	2.54967	0.145695	2.81325	0.0210827	1.18894	0.42262	134.495	1.58249	138.104	3.63259	200.606	59.2325	134.495	1.58249	97.3869
-Spot 3	63.7903	16281.4	1.71317	20.979	3.75734	0.138539	3.99406	0.0210885	1.35458	0.33915	134.531	1.80346	131.742	4.93482	81.6998	89.1872	134.531	1.80346	102.118
-Spot 88	121.071	11053.5	2.04786	19.9149	2.17091	0.146054	2.38467	0.0211046	0.986816	0.413817	134.633	1.31481	138.422	3.08579	203.865	50.3943	134.633	1.31481	97.2634
-Spot 45	144.571	3624.3	1.70089	22.0443	2.45246	0.131964	2.67534	0.0211076	1.06906	0.399597	134.652	1.42458	125.861	3.16689	NA	NA	134.652	1.42458	106.985
-Spot 63	107.452	6799.51	1.65535	20.3496	2.0395	0.142985	2.4547	0.0211123	1.36601	0.556488	134.682	1.82068	135.699	3.11803	153.57	47.7748	134.682	1.82068	99.2499
-Spot 46	132.602	8730.81	2.25735	21.7497	1.37162	0.134003	1.69991	0.0211473	1.00417	0.59072	134.903	1.34058	127.688	2.03965	NA	NA	134.903	1.34058	105.65
-Spot 13	101.589	10361.7	1.57472	20.6084	2.61202	0.141427	2.87488	0.0211477	1.20095	0.417738	134.906	1.60331	134.314	3.61689	123.841	61.5123	134.906	1.60331	100.441
-Spot 55	145.669	12802.4	1.69794	21.0848	1.68439	0.138233	1.99511	0.0211479	1.06925	0.535936	134.907	1.4275	131.468	2.46023	69.7548	40.0682	134.907	1.4275	102.615
-Spot 102	101.317	67218.8	2.14997	18.8531	2.18721	0.154599	2.47364	0.0211484	1.15542	0.467093	134.91	1.54257	145.964	3.36312	329.569	49.6031	134.91	1.54257	92.4265
-Spot 26	223.276	26734.9	1.52094	19.8859	1.77627	0.146635	1.99603	0.0211579	0.91049	0.456151	134.97	1.21611	138.937	2.59186	207.252	41.2111	134.97	1.21611	97.1446
-Spot 97	135.779	5248.15	2.52107	21.4836	2.14059	0.135824	2.45165	0.0211724	1.19518	0.487501	135.061	1.59744	129.318	2.97683	25.0308	51.335	135.061	1.59744	104.442
-Spot 79	89.9065	88659.4	2.47758	19.9766	2.05507	0.146076	2.44996	0.0211733	1.33379	0.544414	135.067	1.78277	138.441	3.17071	196.704	47.7468	135.067	1.78277	97.5624
-Spot 107	296.93	24964.2	1.80928	20.6715	1.14328	0.141172	1.46916	0.0211743	0.922683	0.628034	135.073	1.23333	134.087	1.84543	116.645	26.9611	135.073	1.23333	100.735
-Spot 57	77.695	25023.3	1.81212	20.6903	2.67695	0.141081	2.95091	0.0211799	1.24168	0.420778	135.109	1.66015	134.007	3.70459	114.497	63.1538	135.109	1.66015	100.822
-Spot 4	106.185	16104.1	2.17642	19.3885	1.81157	0.150603	2.10653	0.0211867	1.07503	0.510334	135.152	1.4378	142.444	2.79966	265.716	41.5533	135.152	1.4378	94.8806
-Spot 98	105.234	7814.15	1.36305	21.4772	1.97149	0.135974	2.30505	0.0211896	1.19435	0.518144	135.17	1.59759	129.452	2.80156	25.7141	47.2787	135.17	1.59759	104.417
-Spot 20	134.562	7563.59	1.58534	21.3748	1.82283	0.1368	2.1853	0.0212166	1.20532	0.551559	135.34	1.61428	130.189	2.67019	37.1498	43.61	135.34	1.61428	103.956
-Spot 62	159.973	53338.4	1.63664	20.3456	1.68443	0.143784	2.04246	0.021226	1.15513	0.565561	135.399	1.54773	136.408	2.60705	153.988	39.4733	135.399	1.54773	99.2602
-Spot 78	148.882	8404.45	1.63767	20.4369	2.36333	0.143164	2.53054	0.0212292	0.904593	0.35747	135.42	1.21222	135.858	3.21787	143.525	55.4457	135.42	1.21222	99.6779
-Spot 94	98.9982	8625.44	1.37258	22.0519	2.18195	0.132964	2.49686	0.0212749	1.21383	0.486143	135.708	1.63005	126.758	2.97539	NA	NA	135.708	1.63005	107.061
-Spot 14	367.847	109115	3.21814	20.0425	0.880017	0.146354	1.29389	0.0212835	0.948536	0.733089	135.763	1.27429	138.687	1.67731	189.02	20.4964	135.763	1.27429	97.8912
-Spot 19	94.7512	41664.6	1.41685	21.966	1.87495	0.13356	2.30881	0.0212869	1.34729	0.583541	135.784	1.81027	127.291	2.76217	NA	NA	135.784	1.81027	106.672
-Spot 86	98.8853	53541	2.1239	19.896	2.41919	0.14761	2.63336	0.0213094	1.04024	0.395022	135.926	1.39915	139.8	3.43925	206.089	56.1376	135.926	1.39915	97.229
-Spot 61	108.912	237820	1.77974	19.0972	1.83164	0.153904	2.10231	0.0213258	1.0319	0.490839	136.03	1.38898	145.353	2.84713	300.356	41.7916	136.03	1.38898	93.5859
-Spot 105	191.897	89907.2	2.63305	20.3833	1.96384	0.144229	2.18934	0.0213311	0.967757	0.442031	136.063	1.30296	136.803	2.8021	149.655	46.0514	136.063	1.30296	99.4589
-Spot 110	184.201	22679.1	1.43359	20.2365	1.6806	0.145355	1.96498	0.0213428	1.0182	0.518175	136.137	1.37162	137.802	2.53209	166.564	39.2695	136.137	1.37162	98.7916
-Spot 64	133.246	5689.52	3.14703	21.0738	1.65604	0.139593	1.84196	0.0213449	0.806426	0.43781	136.15	1.08644	132.682	2.291	71.0213	39.389	136.15	1.08644	102.614
-Spot 65	101.781	4404.05	2.38659	21.8045	2.91961	0.134981	3.15769	0.0213553	1.20287	0.380933	136.216	1.62131	128.563	3.81316	NA	NA	136.216	1.62131	105.952
-Spot 56	143.811	16653	2.17102	20.0722	2.63643	0.146646	2.8715	0.0213577	1.13786	0.39626	136.231	1.53385	138.946	3.72891	185.57	61.402	136.231	1.53385	98.0456
-Spot 96	95.6677	30992.1	2.18565	20.7272	2.28408	0.142107	2.55406	0.0213719	1.1429	0.447483	136.321	1.54165	134.919	3.22679	110.312	53.9224	136.321	1.54165	101.039
-Spot 41	136.613	6012.38	2.13124	19.4608	3.41572	0.151389	3.61941	0.0213767	1.19708	0.33074	136.351	1.61509	143.137	4.83218	257.156	78.5229	136.351	1.61509	95.2588
-Spot 37	440.086	308004	2.01627	20.1741	1.18786	0.146042	1.60407	0.0213777	1.07796	0.672019	136.357	1.45444	138.411	2.07554	173.769	27.6981	136.357	1.45444	98.5158
-Spot 27	68.876	7700.73	2.50129	21.1989	2.51307	0.139047	2.85368	0.0213876	1.35203	0.473783	136.42	1.82505	132.195	3.53718	56.8963	59.9355	136.42	1.82505	103.196
-Spot 32	399.455	56783	1.82011	20.4295	1.19048	0.144367	1.57414	0.0213999	1.02989	0.654255	136.497	1.39099	136.926	2.01639	144.341	27.9307	136.497	1.39099	99.687
-Spot 82	124.483	6608.97	1.55995	17.3807	3.05287	0.169717	3.28138	0.0214033	1.2031	0.366644	136.518	1.62518	159.173	4.83432	511.152	67.1242	136.518	1.62518	85.7671
-Spot 49	143.387	7833.17	1.30273	21.3952	2.01974	0.137899	2.27639	0.0214075	1.05004	0.461277	136.545	1.4187	131.171	2.80114	34.8717	48.3444	136.545	1.4187	104.097
-Spot 50	75.8949	11307.8	1.65408	21.6002	2.63855	0.136621	2.90157	0.0214122	1.20715	0.416032	136.575	1.63132	130.029	3.54133	12.0309	63.4414	136.575	1.63132	105.034
-Spot 75	204.915	16707.3	1.23523	20.7907	1.46401	0.14204	1.73547	0.0214273	0.931966	0.537009	136.67	1.26031	134.859	2.19169	103.083	34.6052	136.67	1.26031	101.343
-Spot 43	215.563	30041.2	2.88042	20.8716	1.67561	0.141656	2.04979	0.0214525	1.18067	0.575996	136.829	1.59848	134.518	2.5825	93.9139	39.6842	136.829	1.59848	101.719
-Spot 44	96.579	491002	2.04459	19.3568	2.36817	0.152788	2.72421	0.0214591	1.34651	0.494275	136.871	1.82355	144.371	3.66617	269.437	54.3299	136.871	1.82355	94.8049
-Spot 52	138.243	60091	1.72981	20.4686	1.93313	0.14452	2.21971	0.0214636	1.09094	0.491476	136.899	1.47773	137.061	2.84598	139.891	45.3763	136.899	1.47773	99.8816
-Spot 59	100.699	7181.21	1.83815	20.6818	2.30216	0.143039	2.61447	0.0214649	1.23916	0.473963	136.907	1.67862	135.747	3.32207	115.513	54.2979	136.907	1.67862	100.855
-Spot 16	127.297	552203	1.64757	20.3334	2.04326	0.145567	2.36541	0.0214764	1.19174	0.50382	136.98	1.61523	137.991	3.05198	155.4	47.8443	136.98	1.61523	99.2678
-Spot 99	116.971	10268.5	1.30141	20.7785	2.25191	0.142492	2.56662	0.021483	1.23145	0.479795	137.022	1.66955	135.261	3.25037	104.466	53.2166	137.022	1.66955	101.301
-Spot 33	101.418	20451.3	2.37977	20.1713	2.09134	0.146908	2.41324	0.0215014	1.20417	0.498984	137.138	1.63393	139.178	3.13869	174.098	48.8035	137.138	1.63393	98.5339
-Spot 67	126.132	24746.9	1.84226	20.6163	1.70053	0.144174	1.99832	0.0215667	1.04953	0.525203	137.55	1.42833	136.754	2.55676	122.945	40.0567	137.55	1.42833	100.582
-Spot 85	463.364	69173.1	1.28898	20.5442	1.1918	0.144695	1.67402	0.021569	1.17557	0.702243	137.564	1.60003	137.217	2.1486	131.216	28.023	137.564	1.60003	100.253
-Spot 92	154.039	6752.68	2.12582	20.6345	1.88924	0.14415	2.18316	0.0215822	1.09405	0.501131	137.648	1.48997	136.733	2.79285	120.904	44.521	137.648	1.48997	100.669
-Spot 100	107.981	13338.9	5.02547	21.3972	2.46462	0.139295	2.70898	0.0216262	1.12438	0.415056	137.926	1.53433	132.416	3.36308	34.6659	59.0238	137.926	1.53433	104.161
-Spot 48	91.7945	12860.4	1.51262	20.8166	2.27602	0.143194	2.45977	0.0216283	0.932842	0.379239	137.939	1.27308	135.885	3.12846	100.121	53.8381	137.939	1.27308	101.512
-Spot 54	118.118	8324.31	1.93769	20.6368	2.08624	0.144493	2.38731	0.0216359	1.16054	0.486127	137.987	1.58437	137.038	3.06037	120.649	49.1429	137.987	1.58437	100.692
-Spot 42	109.607	5507.33	3.01229	22.2354	2.29529	0.134216	2.45699	0.0216539	0.876587	0.356774	138.1	1.1977	127.879	2.95218	NA	NA	138.1	1.1977	107.993
-Spot 69	113.259	13069.6	2.32446	20.3122	2.11135	0.146973	2.34602	0.0216612	1.02275	0.43595	138.146	1.39785	139.236	3.05244	157.848	49.4166	138.146	1.39785	99.2173
-Spot 76	38.2447	1982.76	2.41679	23.9164	4.49991	0.124858	4.66241	0.021667	1.22018	0.261706	138.183	1.66814	119.467	5.25487	NA	NA	138.183	1.66814	115.667
-Spot 104	111.656	20447.3	1.61538	20.4373	1.83251	0.146142	2.17254	0.0216714	1.16698	0.537149	138.211	1.59572	138.5	2.81279	143.443	42.9989	138.211	1.59572	99.7911
-Spot 2	80.0639	8349.67	1.83803	21.9516	2.65236	0.136206	2.81269	0.0216945	0.93606	0.332799	138.357	1.2813	129.659	3.42367	NA	NA	138.357	1.2813	106.708
-Spot 38	317.471	20665.9	4.11689	20.328	1.43095	0.147742	1.78772	0.0217915	1.0716	0.599423	138.968	1.47325	139.916	2.33663	156.015	33.5234	138.968	1.47325	99.3226
-Spot 60	161.293	19751	2.92085	19.3253	1.58857	0.155451	1.82849	0.0217976	0.905438	0.495183	139.007	1.24514	146.713	2.49785	273.165	36.4054	139.007	1.24514	94.7469
-Spot 5	209.592	16788.1	2.58497	20.2078	2.0379	0.148869	2.28489	0.0218278	1.03329	0.452228	139.197	1.4229	140.913	3.00629	169.878	47.6132	139.197	1.4229	98.7827
-Spot 36	310.895	32692.2	1.64178	20.5335	1.25956	0.146797	1.6078	0.0218709	0.999264	0.62151	139.469	1.3787	139.08	2.08974	132.415	29.6059	139.469	1.3787	100.28
-Spot 6	219.836	21116.9	1.42169	19.2802	2.14564	0.15645	2.34371	0.0218864	0.942982	0.402346	139.567	1.30195	147.591	3.21947	278.566	49.1428	139.567	1.30195	94.5633
-Spot 81	208.35	13426.6	2.57803	20.8001	1.53812	0.145104	1.90403	0.0218993	1.12229	0.589426	139.649	1.55041	137.579	2.44985	102.015	36.3567	139.649	1.55041	101.504
-Spot 83	173.087	8108.96	2.1526	19.9951	1.86314	0.150946	2.07298	0.0218994	0.90883	0.438417	139.649	1.25553	142.747	2.76053	194.573	43.3091	139.649	1.25553	97.83
-Spot 15	155.494	152738	2.08878	20.4044	2.11116	0.14794	2.44862	0.0219026	1.24047	0.506599	139.669	1.71392	140.091	3.2042	147.233	49.5001	139.669	1.71392	99.6987
-Spot 84	398.975	40353.7	1.8562	19.6884	1.13041	0.15344	1.51455	0.0219197	1.00798	0.665533	139.777	1.39376	144.945	2.04577	230.347	26.0905	139.777	1.39376	96.4351
-Spot 17	270.147	55959.5	3.79693	20.1075	1.30847	0.150268	1.58273	0.0219237	0.890472	0.562619	139.802	1.2315	142.149	2.09945	181.48	30.4882	139.802	1.2315	98.3492
-Spot 40	158.647	11711.4	2.23744	20.1581	1.78597	0.150093	2.17362	0.0219532	1.23891	0.569979	139.988	1.71564	141.994	2.88032	175.625	41.6619	139.988	1.71564	98.5874
-Spot 30	236.381	16589.8	1.4447	20.0289	1.49269	0.151214	1.91403	0.0219755	1.19807	0.625944	140.129	1.66073	142.984	2.5528	190.642	34.7463	140.129	1.66073	98.0036
-Spot 58	92.405	16854.8	2.16355	19.5766	2.34019	0.154802	2.70041	0.0219888	1.34749	0.498994	140.213	1.86896	146.143	3.67562	243.504	53.9097	140.213	1.86896	95.9424
-Spot 47	125.191	14023.7	2.85269	21.1847	1.93846	0.143155	2.25997	0.0220049	1.16182	0.514085	140.314	1.61258	135.85	2.87366	58.5358	46.2157	140.314	1.61258	103.286
-Spot 12	54.2133	195106	2.00054	19.6483	3.15452	0.15586	3.56816	0.0222202	1.66756	0.467345	141.672	2.3367	147.073	4.88548	235.097	72.8282	141.672	2.3367	96.3278
-Spot 108	61.4608	9019.81	2.45658	18.6414	2.6207	0.164534	2.95638	0.0222546	1.36827	0.462818	141.89	1.92022	154.664	4.24127	355.163	59.1718	141.89	1.92022	91.7405
-Spot 24	251.913	8686.86	1.64049	21.4888	1.43957	0.143285	1.67476	0.0223409	0.855837	0.511021	142.434	1.20563	135.966	2.13123	24.4216	34.5416	142.434	1.20563	104.757
-Spot 23	127.426	10641.1	2.24127	21.2061	1.94531	0.145433	2.23657	0.0223776	1.10365	0.493455	142.665	1.55723	137.872	2.88343	56.109	46.3934	142.665	1.55723	103.476
-Spot 74	221.281	50793.5	2.32383	20.3208	1.62631	0.151832	2.16796	0.0223868	1.43358	0.661258	142.723	2.02357	143.528	2.90172	156.879	38.0923	142.723	2.02357	99.4391
-Spot 25	155.918	21905	2.90848	20.5073	2.01815	0.154029	2.30477	0.0229192	1.11311	0.482961	146.079	1.60774	145.463	3.12353	135.437	47.4074	146.079	1.60774	100.423
-Spot 95	238.115	12492.9	1.86689	19.8555	1.25837	0.163611	1.74833	0.0235712	1.21374	0.694229	150.186	1.80181	153.859	2.49609	210.795	29.181	150.186	1.80181	97.613
-Spot 34	707.325	159148	24.0405	20.055	0.869375	0.162217	1.45895	0.0236051	1.17163	0.803064	150.4	1.74173	152.642	2.06766	187.576	20.2351	150.4	1.74173	98.5313
-Spot 73	193.536	9125.23	2.5141	20.9629	1.62441	0.155588	1.95053	0.0236656	1.07974	0.553562	150.781	1.60914	146.834	2.66659	83.5212	38.5573	150.781	1.60914	102.688
-Spot 93	63.0908	7433.9	3.59075	20.5168	2.44812	0.159623	2.6908	0.0237626	1.11674	0.415023	151.392	1.67096	150.373	3.76091	134.325	57.5723	151.392	1.67096	100.677
-Spot 70	110.753	46533.4	10.5525	18.7647	2.1287	0.197147	2.37358	0.0268423	1.05001	0.442373	170.755	1.7694	182.709	3.96897	340.262	48.1915	170.755	1.7694	93.4573
-Spot 22	1142.46	2.30127e+06	1.28386	18.2825	0.77296	0.460672	1.41332	0.0611104	1.18322	0.837191	382.375	4.39277	384.725	4.52598	398.865	17.323	382.375	4.39277	99.3891
-Spot 103	39.5674	15978.4	3.74206	18.5037	2.06972	0.477468	2.36637	0.0641047	1.14715	0.484774	400.54	4.45498	396.334	7.76509	371.852	46.6082	400.54	4.45498	107.715
-Spot 29	40.672	495709	3.01745	17.7704	2.06387	0.502362	2.24954	0.0647743	0.894907	0.397819	404.595	3.50947	413.3	7.63789	462.222	45.7597	404.595	3.50947	87.5328
-Spot 51	238.446	57208.8	1.24035	17.9806	0.966277	0.500694	1.23841	0.0653229	0.774581	0.625463	407.916	3.06175	412.172	4.19545	436.056	21.5184	407.916	3.06175	93.5467
-Spot 77	264.71	648528	2.96493	18.0624	0.90806	0.502411	1.35056	0.065845	0.99972	0.740226	411.074	3.98131	413.333	4.58582	425.943	20.2545	411.074	3.98131	96.5093
-Spot 10	1416.16	894491	1.0627	18.1834	0.700469	0.513129	1.25661	0.0677002	1.04327	0.830227	422.285	4.26439	420.551	4.32698	411.033	15.6643	422.285	4.26439	102.737
-Spot 87	377.714	136320	1.63238	17.597	0.671373	0.542573	1.09485	0.0692761	0.864846	0.78992	431.793	3.61202	440.119	3.91021	483.924	14.8254	431.793	3.61202	89.2273
-Spot 7	569.33	216335	2.95932	17.9548	0.778602	0.542609	1.48216	0.0706896	1.26118	0.850907	440.309	5.36769	440.143	5.29371	439.254	17.3265	440.309	5.36769	100.24
-Spot 1	1004.37	227967	1.30059	16.3466	0.649792	0.858256	1.33899	0.101796	1.17076	0.874356	624.928	6.97293	629.171	6.27949	644.472	13.9649	624.928	6.97293	96.9673

## Sheet: DC-RCR datatable 1-2020
U-Pb geochronologic analyses.
							Isotope ratios						Apparent ages (Ma)
Analysis	U	206Pb	U/Th	206Pb*	±	207Pb*	±	206Pb*	±	error	206Pb*	±	207Pb*	±	206Pb*	±	Best age	±	Conc
	(ppm)	204Pb		207Pb*	(%)	235U*	(%)	238U	(%)	corr.	238U*	(Ma)	235U	(Ma)	207Pb*	(Ma)	(Ma)	(Ma)	(%)
-Spot 71	323.029	117733	3.61883	20.3733	1.11908	0.141244	1.65008	0.0208795	1.21261	0.734881	133.212	1.59877	134.152	2.07361	150.843	26.2236	133.212	1.59877	99.2994
-Spot 80	624.677	32460.8	1.33399	20.418	1.33761	0.142344	1.80044	0.0210882	1.20515	0.669364	134.53	1.60448	135.13	2.27798	145.702	31.3755	134.53	1.60448	99.5563
-SAMPLE 1 Spot 5	255.193	8560.11	1.38456	20.4221	2.27156	0.142761	2.43551	0.0211542	0.878472	0.360693	134.947	1.17315	135.5	3.08941	145.192	53.3083	134.947	1.17315	99.5914
-Spot 68	230.686	15209.4	5.13617	20.8816	1.60464	0.13986	2.25455	0.0211908	1.5837	0.702446	135.177	2.11851	132.919	2.80888	92.7387	38.0098	135.177	2.11851	101.699
-SAMPLE 1 Spot 4	856.08	19095.5	1.21185	20.1478	1.29796	0.145388	1.56977	0.0212542	0.882884	0.562429	135.577	1.18449	137.831	2.02321	176.813	30.2612	135.577	1.18449	98.3646
-Spot 14	145.38	22394	1.32861	20.4082	2.13041	0.144137	2.4952	0.0213436	1.29899	0.520594	136.142	1.74992	136.722	3.19179	146.832	49.9745	136.142	1.74992	99.5757
-Spot 98	109.078	2.90542e+06	2.0689	19.5307	1.65148	0.150627	1.97636	0.0213456	1.08564	0.549312	136.155	1.46264	142.466	2.62703	248.932	38.0265	136.155	1.46264	95.5701
-Spot 34	158.03	13174.2	1.33514	20.2518	1.5753	0.145856	2.04079	0.0214325	1.2974	0.635735	136.703	1.75492	138.246	2.63768	164.798	36.7987	136.703	1.75492	98.8841
-Spot 86	231.638	11715.1	1.95905	20.4366	1.55359	0.144844	1.95389	0.0214782	1.18492	0.606443	136.991	1.60611	137.349	2.51006	143.543	36.4336	136.991	1.60611	99.7393
-Spot 28	133.945	11067.7	1.39395	19.9982	2.03944	0.148113	2.26003	0.0214917	0.973866	0.430908	137.077	1.32085	140.244	2.96042	194.21	47.4078	137.077	1.32085	97.7416
-Spot 43	275.363	15804.6	3.9961	20.083	1.21704	0.147729	1.5302	0.021527	0.927542	0.606156	137.299	1.26004	139.905	1.99989	184.319	28.3266	137.299	1.26004	98.1376
-SAMPLE 1 Spot 34	561.514	25443.2	4.30154	20.3753	1.14978	0.145669	1.60862	0.0215357	1.12502	0.699369	137.354	1.52891	138.08	2.07678	150.607	26.9453	137.354	1.52891	99.4741
-Spot 99	389.979	75140.7	1.23823	20.4243	1.11021	0.145402	1.40861	0.0215479	0.866962	0.615472	137.431	1.17887	137.844	1.81566	144.935	26.0221	137.431	1.17887	99.7006
-Spot 75	196.788	6595.69	3.48918	21.7289	1.42468	0.137107	1.66781	0.0216165	0.867113	0.51991	137.864	1.18275	130.464	2.04191	NA	NA	137.864	1.18275	105.672
-Spot 20	149.151	35916.9	1.642	20.4377	1.35894	0.145881	1.63454	0.0216332	0.908302	0.555692	137.969	1.23986	138.269	2.11294	143.414	31.8708	137.969	1.23986	99.7834
-Spot 100	279.967	66643.8	1.59338	20.405	1.10567	0.146258	1.46102	0.0216544	0.955031	0.653674	138.103	1.3049	138.603	1.89289	147.175	25.9156	138.103	1.3049	99.6396
-SAMPLE 1 Spot 32	390.57	30322.2	1.97893	20.5981	1.81116	0.145664	2.04026	0.0217705	0.939353	0.460408	138.836	1.29021	138.076	2.63397	125.017	42.6469	138.836	1.29021	100.55
-Spot 82	142.634	78793.9	1.01917	19.5733	1.99326	0.153393	2.15933	0.0217849	0.830445	0.384584	138.927	1.14137	144.903	2.91594	243.909	45.9066	138.927	1.14137	95.8758
-Spot 101	150.841	12185.5	6.30801	21.1124	1.93474	0.142336	2.23624	0.0218042	1.12141	0.501471	139.048	1.54261	135.122	2.82925	66.6485	46.0745	139.048	1.54261	102.905
-Spot 89	339.495	25232.8	0.905364	20.3285	1.60853	0.14809	1.85404	0.0218433	0.921996	0.497291	139.295	1.27052	140.224	2.42828	155.987	37.6608	139.295	1.27052	99.3377
-SAMPLE 1 Spot 18	529.728	15007.9	3.06766	20.2638	1.40716	0.148615	1.76024	0.0218511	1.05751	0.600777	139.344	1.45776	140.688	2.31255	163.406	32.9141	139.344	1.45776	99.0444
-Spot 56	124.722	40577.9	4.41713	19.7545	1.45025	0.152675	1.68911	0.0218838	0.865947	0.512664	139.551	1.19545	144.271	2.2717	222.617	33.5595	139.551	1.19545	96.7279
-SAMPLE 1 Spot 8	424.775	11083.3	4.43453	20.2686	1.61904	0.149228	1.92068	0.0219464	1.03331	0.537992	139.946	1.43049	141.23	2.53239	162.851	37.8779	139.946	1.43049	99.0903
-Spot 120	649.088	141567	2.80192	20.0539	0.781668	0.150855	1.2766	0.0219505	1.00931	0.790622	139.971	1.39752	142.666	1.69912	187.704	18.2069	139.971	1.39752	98.1111
-Spot 104	143.666	70881.3	1.24346	20.8401	1.87379	0.145252	2.16801	0.0219638	1.09051	0.502998	140.056	1.51084	137.711	2.79199	97.4525	44.3394	140.056	1.51084	101.703
-Spot 81	184.221	17233.8	1.24829	20.1162	1.31435	0.150926	1.60866	0.0220291	0.927496	0.576566	140.467	1.28874	142.729	2.14196	180.479	30.6323	140.467	1.28874	98.4152
-Spot 96	235.576	109950	1.83381	20.3194	1.30849	0.149822	1.54815	0.0220889	0.827413	0.534453	140.844	1.15273	141.755	2.04827	157.035	30.606	140.844	1.15273	99.3578
-SAMPLE 1 Spot 43	615.09	432522	0.91024	19.9864	1.34584	0.152505	1.75188	0.022116	1.12153	0.640184	141.015	1.56435	144.122	2.35385	195.589	31.2804	141.015	1.56435	97.8446
-Spot 24	267.776	10223.8	1.39651	21.5412	1.43162	0.141694	1.79881	0.0221468	1.08912	0.605468	141.209	1.52122	134.552	2.26683	18.6069	34.3648	141.209	1.52122	104.948
-Spot 25	84.6523	20230.4	2.6914	20.5979	2.35443	0.148229	2.61154	0.0221536	1.12994	0.432673	141.253	1.57871	140.347	3.4232	125.038	55.4202	141.253	1.57871	100.645
-SAMPLE 1 Spot 7	232.879	3608.79	1.26014	21.5152	4.16994	0.141971	4.31238	0.0221632	1.09919	0.254891	141.313	1.53639	134.798	5.4437	21.4798	100.119	141.313	1.53639	104.833
-Spot 8	103.567	5321.74	1.82578	21.9483	2.3886	0.140001	2.68937	0.0222956	1.23584	0.459527	142.148	1.73749	133.045	3.35356	NA	NA	142.148	1.73749	106.842
-Spot 33	13383	279229	2.58878	20.4321	0.403831	0.150664	0.80826	0.0223363	0.700147	0.866239	142.404	0.986107	142.498	1.07459	144.043	9.49601	142.404	0.986107	99.934
-SAMPLE 1 Spot 13	535.789	23564	2.17418	20.2855	1.12412	0.152165	1.50368	0.0223969	0.998709	0.664176	142.787	1.41035	143.822	2.01644	160.923	26.2846	142.787	1.41035	99.2803
-SAMPLE 1 Spot 16	509.688	13613.2	2.13973	20.7677	1.09546	0.148649	1.79724	0.0223994	1.42479	0.792765	142.803	2.01226	140.718	2.36162	105.682	25.9005	142.803	2.01226	101.481
-Spot 31	295.841	15559.2	2.54278	20.1682	1.45027	0.153312	1.85542	0.0224353	1.15727	0.623726	143.029	1.63701	144.832	2.50439	174.455	33.8282	143.029	1.63701	98.7547
-Spot 16	187.625	14827	3.05546	20.801	1.44472	0.148655	1.97112	0.0224364	1.34093	0.680291	143.036	1.89689	140.724	2.59021	101.9	34.1414	143.036	1.89689	101.643
-Spot 69	439.284	85621.7	1.91467	20.0182	1.11578	0.154507	1.91122	0.0224419	1.55171	0.811893	143.071	2.19558	145.883	2.59712	191.886	25.9685	143.071	2.19558	98.072
-Spot 30	216.45	30078.8	2.95075	20.2266	1.18383	0.153091	1.63614	0.0224677	1.12937	0.690269	143.233	1.5998	144.637	2.20565	167.706	27.6746	143.233	1.5998	99.0293
-Spot 15	426.171	76095.5	1.69545	20.3744	1.17151	0.152015	1.49421	0.0224729	0.92748	0.620718	143.266	1.3141	143.689	2.00202	150.71	27.4534	143.266	1.3141	99.7053
-Spot 70	262.663	47143.4	2.44608	20.4998	0.859685	0.151094	1.78773	0.0224742	1.56746	0.876786	143.274	2.22099	142.878	2.38271	136.273	20.1808	143.274	2.22099	100.278
-Spot 29	198.866	22806.7	2.51062	20.8428	1.65799	0.148612	2.06691	0.0224748	1.23417	0.59711	143.278	1.74879	140.686	2.71539	97.1449	39.2431	143.278	1.74879	101.843
-SAMPLE 1 Spot 30	621.269	18378.3	1.52787	20.7282	1.20522	0.149846	1.71341	0.022537	1.21787	0.710788	143.67	1.73036	141.776	2.26724	110.191	28.4569	143.67	1.73036	101.335
-SAMPLE 1 Spot 10	189.385	8289.79	1.3296	19.9795	1.83868	0.15557	2.20245	0.0225527	1.21245	0.5505	143.769	1.72383	146.818	3.0107	196.384	42.7403	143.769	1.72383	97.9232
-Spot 21	219.791	43697.4	2.81808	21.0455	1.17814	0.14784	1.50722	0.0225756	0.940044	0.623695	143.913	1.33786	140.003	1.97114	74.2198	28.0206	143.913	1.33786	102.793
-Spot 109	215.836	22748.8	2.75013	20.6447	1.63092	0.150714	1.97612	0.0225762	1.11586	0.564674	143.917	1.58812	142.542	2.62803	119.698	38.4477	143.917	1.58812	100.964
-Spot 110	273.813	16530.7	2.09282	20.1462	1.41641	0.154481	1.8569	0.0225816	1.20078	0.646656	143.951	1.70937	145.86	2.52294	177.004	33.0374	143.951	1.70937	98.6909
-Spot 32	514.819	65760.2	1.70155	19.8459	1.05079	0.156828	1.59142	0.022583	1.19517	0.751013	143.96	1.7015	147.923	2.19063	211.916	24.3638	143.96	1.7015	97.3209
-SAMPLE 1 Spot 12	430.223	322524	2.21485	20.2133	1.56802	0.154012	1.89177	0.0225882	1.05835	0.55945	143.992	1.50705	145.448	2.56357	169.239	36.6213	143.992	1.50705	98.999
-Spot 102	391.728	82056.9	2.15251	20.0736	1.33645	0.15541	1.65202	0.0226356	0.971121	0.587838	144.291	1.38568	146.677	2.25626	185.41	31.1411	144.291	1.38568	98.3734
-Spot 47	269.231	32353.2	3.0442	20.823	1.44458	0.149821	1.83955	0.0226362	1.13892	0.619128	144.295	1.62515	141.754	2.4338	99.3895	34.165	144.295	1.62515	101.793
-SAMPLE 1 Spot 9	1396.52	194139	1.47885	20.2122	1.13415	0.154459	1.55536	0.0226524	1.06436	0.684317	144.397	1.51982	145.841	2.11298	169.364	26.4958	144.397	1.51982	99.0101
-Spot 118	155.803	10021.2	3.69261	20.4546	1.49794	0.152873	1.82396	0.0226887	1.04068	0.570558	144.626	1.48833	144.445	2.45581	141.482	35.1638	144.626	1.48833	100.125
-Spot 23	260.33	57108	2.69674	20.5993	1.41747	0.151896	1.79931	0.0227033	1.10828	0.615947	144.718	1.58601	143.585	2.40918	124.877	33.3773	144.718	1.58601	100.789
-Spot 88	223.07	23209.9	2.6433	19.9493	1.37658	0.157075	1.74424	0.0227365	1.07118	0.614122	144.927	1.53511	148.139	2.40427	199.853	31.97	144.927	1.53511	97.8317
-Spot 42	527.671	261088	2.05259	20.5451	0.752227	0.152561	1.22368	0.0227425	0.965168	0.788742	144.966	1.38355	144.171	1.64467	131.102	17.6982	144.966	1.38355	100.551
-Spot 41	380.551	57974.6	2.62658	20.467	1.01888	0.153479	1.50383	0.0227925	1.10606	0.7355	145.28	1.58892	144.979	2.03174	140.071	23.9137	145.28	1.58892	100.208
-Spot 40	203.141	25366.4	3.39587	20.295	1.43873	0.154879	1.7367	0.022807	0.972717	0.560095	145.372	1.39823	146.21	2.36489	159.811	33.6599	145.372	1.39823	99.4266
-SAMPLE 1 Spot 29	354.25	19682.6	2.75548	20.3077	1.51921	0.1548	1.97488	0.0228097	1.2618	0.638927	145.389	1.81399	146.141	2.68804	158.349	35.5745	145.389	1.81399	99.4852
-Spot 58	358.486	70864.8	2.65187	19.9689	1.14858	0.157509	1.62543	0.0228217	1.15013	0.707585	145.464	1.6543	148.521	2.24585	197.614	26.7011	145.464	1.6543	97.9422
-SAMPLE 1 Spot 1	676.862	25399.5	1.69271	20.1049	1.05476	0.156519	1.35618	0.0228328	0.852483	0.628589	145.534	1.22675	147.652	1.86365	181.78	24.5916	145.534	1.22675	98.5658
-SAMPLE 1 Spot 33	581.103	13656.4	2.43895	20.5108	1.09976	0.153522	1.40769	0.0228476	0.878709	0.624218	145.628	1.2653	145.017	1.90232	135.036	25.8475	145.628	1.2653	100.421
-Spot 93	75.3547	6567.72	2.79053	20.28	3.64651	0.155566	3.92267	0.0228913	1.44578	0.36857	145.903	2.08574	146.815	5.36212	161.561	85.3105	145.903	2.08574	99.3791
-Spot 1	154.912	10235	3.40311	21.0704	1.58274	0.149926	1.83336	0.0229211	0.925277	0.50469	146.091	1.33655	141.846	2.42708	71.376	37.6224	146.091	1.33655	102.993
-SAMPLE 1 Spot 2	199.051	8842.38	1.53201	21.0203	2.56601	0.150372	2.814	0.0229348	1.15508	0.410475	146.177	1.66946	142.241	3.73496	77.032	60.9871	146.177	1.66946	102.768
-Spot 112	91.7913	4747.33	3.42176	20.7371	2.38378	0.152481	2.70083	0.022943	1.26967	0.470103	146.229	1.83573	144.1	3.62836	109.179	56.2994	146.229	1.83573	101.478
-SAMPLE 1 Spot 50	464.27	35717.9	2.05335	20.491	1.12406	0.154472	1.52941	0.0229668	1.03711	0.678109	146.379	1.501	145.853	2.07788	137.301	26.4067	146.379	1.501	100.361
-SAMPLE 1 Spot 3	447.416	191548	2.01192	20.7172	1.33096	0.152851	1.64283	0.0229768	0.963037	0.586205	146.442	1.39439	144.426	2.21167	111.425	31.4321	146.442	1.39439	101.395
-SAMPLE 1 Spot 15	335.578	113044	2.2267	19.7114	2.34325	0.160725	2.61996	0.0229873	1.1719	0.447296	146.508	1.69756	151.337	3.68366	227.668	54.1716	146.508	1.69756	96.8089
-Spot 39	255.421	55870	2.58686	19.8146	1.1774	0.159937	1.87511	0.0229944	1.45937	0.778288	146.553	2.11462	150.648	2.62525	215.59	27.2875	146.553	2.11462	97.2817
-Spot 37	439.527	605917	1.96077	20.1882	1.09539	0.157161	1.50445	0.0230213	1.03125	0.685468	146.722	1.49599	148.215	2.07472	172.142	25.5591	146.722	1.49599	98.9929
-Spot 103	747.413	45419.5	1.65177	20.2891	0.754299	0.15643	1.23907	0.0230287	0.983018	0.793352	146.769	1.42647	147.573	1.70187	160.492	17.644	146.769	1.42647	99.4551
-Spot 12	189.587	12883.5	2.77327	20.2245	1.27794	0.157207	1.6249	0.0230695	1.00358	0.617628	147.026	1.45884	148.256	2.2414	167.944	29.8681	147.026	1.45884	99.1707
-SAMPLE 1 Spot 23	577.961	147936	1.72191	20.4984	1.32865	0.155385	1.71915	0.0231109	1.09095	0.634587	147.287	1.58861	146.655	2.34761	136.429	31.2188	147.287	1.58861	100.431
-Spot 119	257.475	99653	2.19358	20.3026	1.46746	0.156979	1.85055	0.023125	1.12743	0.609241	147.376	1.64271	148.056	2.54946	158.981	34.3601	147.376	1.64271	99.5407
-SAMPLE 1 Spot 48	614.564	1.12434e+06	2.1763	19.7727	1.13135	0.161199	1.45169	0.0231269	0.909638	0.626606	147.388	1.32549	151.752	2.04626	220.477	26.163	147.388	1.32549	97.1239
-Spot 85	61.1428	62553.6	1.7796	18.8181	2.53328	0.169382	2.76974	0.0231276	1.1198	0.404296	147.392	1.63177	158.882	4.07363	333.783	57.4146	147.392	1.63177	92.7682
-Spot 22	301.155	20625.7	1.64476	20.9016	1.20629	0.152705	1.72288	0.0231591	1.23011	0.713987	147.59	1.7949	144.298	2.31751	90.4978	28.5981	147.59	1.7949	102.282
-Spot 54	353.114	26636.4	3.34135	20.4455	0.940141	0.156136	1.47026	0.0231627	1.1304	0.768843	147.613	1.64966	147.315	2.01613	142.514	22.0506	147.613	1.64966	100.202
-Spot 92	274.05	26791.3	1.85728	20.4159	1.12961	0.156619	1.57168	0.0232007	1.09277	0.695289	147.852	1.5973	147.739	2.16096	145.942	26.4895	147.852	1.5973	100.077
-Spot 67	269.64	18235.7	2.26659	20.3565	1.39345	0.157107	1.72458	0.0232052	1.01611	0.589193	147.881	1.48553	148.167	2.37758	152.738	32.6339	147.881	1.48553	99.8068
-SAMPLE 1 Spot 41	509.303	38728.1	2.40483	20.3065	1.61281	0.157546	1.96944	0.0232128	1.13029	0.573912	147.929	1.65298	148.552	2.72171	158.49	37.7452	147.929	1.65298	99.5804
-Spot 91	667.223	143414	1.84527	20.5608	1.09958	0.155607	1.51592	0.0232143	1.04352	0.688375	147.939	1.52619	146.851	2.07264	129.332	25.8587	147.939	1.52619	100.741
-Spot 35	653.937	138749	1.40843	20.3305	0.857002	0.157551	1.58105	0.0232411	1.32863	0.840348	148.107	1.94536	148.557	2.18502	155.739	20.0476	148.107	1.94536	99.6973
-Spot 9	298.414	94518.9	2.3062	20.3116	1.1853	0.157923	1.57068	0.0232743	1.03058	0.656139	148.317	1.51108	148.883	2.17512	157.938	27.7225	148.317	1.51108	99.6194
-Spot 87	415.008	19044.1	1.98015	20.8567	1.11508	0.153827	1.71757	0.0232791	1.30638	0.760598	148.347	1.91584	145.286	2.32507	95.599	26.4013	148.347	1.91584	102.107
-Spot 57	162.468	8373.62	2.90129	21.3369	2.2345	0.150385	2.57995	0.0232822	1.28962	0.499862	148.366	1.89151	142.252	3.42456	41.4468	53.446	148.366	1.89151	104.298
-Spot 108	82.1746	100670	2.21959	20.1767	2.247	0.15907	2.56666	0.0232877	1.24047	0.483301	148.401	1.81984	149.888	3.57667	173.468	52.4628	148.401	1.81984	99.0074
-Spot 84	144.386	9368.27	3.0744	20.576	2.11704	0.156008	2.36096	0.0232915	1.04513	0.44267	148.425	1.5335	147.203	3.23524	127.588	49.8273	148.425	1.5335	100.83
-SAMPLE 1 Spot 49	366.223	12890.1	2.1291	21.0417	1.4584	0.152604	1.81564	0.0232989	1.08149	0.595653	148.471	1.58736	144.208	2.44088	74.6562	34.6559	148.471	1.58736	102.956
-SAMPLE 1 Spot 17	171.545	2325.04	2.25865	22.9387	1.82503	0.140021	2.18997	0.023305	1.21046	0.55273	148.51	1.7771	133.062	2.73117	NA	NA	148.51	1.7771	111.609
-Spot 19	182.972	30094	3.02899	20.4627	1.69066	0.157181	1.9618	0.0233373	0.995164	0.507269	148.713	1.463	148.232	2.70573	140.568	39.6952	148.713	1.463	100.324
-Spot 90	313.645	81722.9	2.54028	20.321	1.18865	0.158434	1.41464	0.0233605	0.767018	0.542199	148.86	1.1287	149.332	1.96452	156.858	27.8011	148.86	1.1287	99.6838
-Spot 27	116.67	7290.25	3.01588	21.411	1.67424	0.150525	1.9972	0.0233848	1.08891	0.545219	149.013	1.604	142.375	2.65316	33.1433	40.1058	149.013	1.604	104.662
-SAMPLE 1 Spot 47	486.185	48575.9	2.07243	20.4794	1.32232	0.157467	1.7608	0.0233988	1.16271	0.660329	149.101	1.71371	148.484	2.43233	138.643	31.034	149.101	1.71371	100.416
-SAMPLE 1 Spot 44	467.836	14672.8	1.9361	20.6189	1.08658	0.158081	1.45373	0.0236501	0.965753	0.664326	150.683	1.43835	149.022	2.01491	122.646	25.6017	150.683	1.43835	101.115
-Spot 74	267.681	18904.3	2.30675	20.1027	1.38761	0.162749	1.70341	0.0237389	0.988009	0.580017	151.242	1.4769	153.106	2.42093	182.033	32.3457	151.242	1.4769	98.7827
-Spot 5	95.8603	6819.78	3.44471	20.8136	2.13821	0.158026	2.32615	0.0238651	0.915998	0.393782	152.037	1.37636	148.974	3.22315	100.487	50.5775	152.037	1.37636	102.056
-Spot 26	170.676	25246.8	3.10207	21.6737	1.36937	0.151958	1.7628	0.023897	1.1101	0.629734	152.238	1.67019	143.639	2.36113	3.80664	32.9617	152.238	1.67019	105.987
-Spot 83	295.831	89940.3	2.51857	20.4785	1.31464	0.166735	1.51205	0.0247749	0.74701	0.494037	157.763	1.1642	156.582	2.19408	138.717	30.8706	157.763	1.1642	100.755
-Spot 73	57.4058	4380.14	7.63092	20.338	2.2222	0.181652	2.58541	0.0268062	1.32144	0.511113	170.529	2.22388	169.481	4.03564	154.906	52.0469	170.529	2.22388	100.618
-SAMPLE 1 Spot 6	23.8098	2173.25	1.39223	17.5667	5.05994	0.385619	5.20996	0.0491514	1.24124	0.238243	309.31	3.74862	331.164	14.7234	487.71	111.725	309.31	3.74862	93.4008

## Sheet: DC-BVR datatable 1-2020
U-Pb geochronologic analyses.																					Michalak, M.J., Cashman, S.M., Langenheim, V.E., Team, T.C., and Christensen, D.J., 2023, Neogene faulting, basin development, and relief generation in the southern Klamath Mountains (USA): Geosphere, v. 19, https://doi.org/10.1130/GES02612.1.
							Isotope ratios						Apparent ages (Ma)
Analysis	U	206Pb	U/Th	206Pb*	±	207Pb*	±	206Pb*	±	error	206Pb*	±	207Pb*	±	206Pb*	±	Best age	±	Conc
	(ppm)	204Pb		207Pb*	(%)	235U*	(%)	238U	(%)	corr.	238U*	(Ma)	235U	(Ma)	207Pb*	(Ma)	(Ma)	(Ma)	(%)
-WFBVR-DC19-01 Spot 281	1691.91	104175	2.25978	20.3833	0.770053	0.107002	1.25808	0.0158253	0.994873	0.79079	101.218	0.999124	103.219	1.23475	149.654	18.0323	101.218	0.999124	98.0613
-WFBVR-DC19-01 Spot 45	694.024	76649.8	2.26288	20.4799	0.978764	0.136732	1.35122	0.0203182	0.931562	0.689425	129.667	1.19586	130.129	1.65032	138.555	22.9773	129.667	1.19586	99.6449
-WFBVR-DC19-01 Spot 83	277.737	14221.1	1.7649	20.1665	1.77143	0.139304	1.99418	0.0203836	0.91587	0.45927	130.08	1.17943	132.424	2.47583	174.655	41.3248	130.08	1.17943	98.23
-WFBVR-DC19-01 Spot 192	225.143	14393.3	1.9995	21.7113	1.8133	0.130977	2.00518	0.0206333	0.855985	0.426886	131.657	1.11553	124.975	2.3579	NA	NA	131.657	1.11553	105.347
-WFBVR-DC19-01 Spot 178	293.895	7115.37	2.60983	21.441	1.47418	0.133403	1.72275	0.0207538	0.891432	0.517448	132.418	1.16837	127.151	2.05888	29.7697	35.3161	132.418	1.16837	104.143
-WFBVR-DC19-01 Spot 56	315.526	90350.2	1.8434	20.2757	1.16095	0.141359	1.4222	0.0207964	0.821479	0.577614	132.687	1.07886	134.254	1.78851	162.063	27.1353	132.687	1.07886	98.8332
-WFBVR-DC19-01 Spot 261	184.436	4440.1	2.88982	21.6551	1.86567	0.132445	2.20394	0.0208105	1.1733	0.532364	132.777	1.54194	126.293	2.61728	5.88491	44.907	132.777	1.54194	105.134
-WFBVR-DC19-01 Spot 236	176.965	31539.3	1.67767	21.2104	1.84459	0.135292	2.17428	0.0208213	1.15109	0.52941	132.844	1.51351	128.842	2.63094	55.6309	43.9996	132.844	1.51351	103.107
-WFBVR-DC19-01 Spot 53	138.695	4564.51	2.1862	21.5124	2.3013	0.133444	2.48468	0.0208294	0.93683	0.377043	132.896	1.23226	127.188	2.9703	21.7801	55.2253	132.896	1.23226	104.488
-WFBVR-DC19-01 Spot 263	128.943	9059.85	1.99613	19.9067	2.30342	0.144639	2.54864	0.0208917	1.09079	0.427988	133.289	1.43897	137.167	3.27007	204.813	53.4544	133.289	1.43897	97.1724
-WFBVR-DC19-01 Spot 240	194.55	8078.41	1.66728	21.3968	1.51346	0.134571	1.94304	0.0208923	1.21854	0.62713	133.293	1.60755	128.197	2.34009	34.6941	36.2438	133.293	1.60755	103.975
-WFBVR-DC19-01 Spot 264	213.406	23906.8	2.54424	20.6135	1.52509	0.139842	1.68228	0.020916	0.710047	0.422075	133.442	0.937765	132.904	2.09567	123.259	35.9104	133.442	0.937765	100.405
-WFBVR-DC19-01 Spot 241	561.248	35946.8	2.24644	20.5346	0.834569	0.140584	1.32591	0.0209464	1.0303	0.777055	133.635	1.36267	133.564	1.6594	132.306	19.6216	133.635	1.36267	100.053
-WFBVR-DC19-01 Spot 119	300.82	79717.2	2.55006	20.1346	1.31625	0.143532	1.79188	0.020969	1.21587	0.678544	133.777	1.6098	136.185	2.2837	178.343	30.6803	133.777	1.6098	98.2324
-WFBVR-DC19-01 Spot 269	412.499	8068.43	2.17478	20.6232	1.24431	0.140444	1.64203	0.0210158	1.07143	0.652503	134.073	1.42166	133.439	2.05325	122.198	29.3063	134.073	1.42166	100.475
-WFBVR-DC19-01 Spot 190	274.482	101608	1.44307	20.9912	1.33021	0.13838	1.6205	0.0210765	0.925504	0.571124	134.456	1.23151	131.6	2.00016	80.3231	31.5864	134.456	1.23151	102.17
-WFBVR-DC19-01 Spot 253	405.46	16471.3	1.89802	20.9852	0.964732	0.138433	1.46182	0.0210785	1.09828	0.751307	134.469	1.46154	131.648	1.80492	81.0066	22.9116	134.469	1.46154	102.143
-WFBVR-DC19-01 Spot 88	246.332	8788.2	2.26325	21.1353	1.31146	0.137658	1.60597	0.0211106	0.926935	0.577181	134.671	1.23536	130.956	1.97314	64.0658	31.2301	134.671	1.23536	102.837
-WFBVR-DC19-01 Spot 237	171.841	8754.14	2.17044	22.0722	1.95521	0.132325	2.25624	0.0211922	1.12596	0.499042	135.186	1.50629	126.185	2.67724	NA	NA	135.186	1.50629	107.133
-WFBVR-DC19-01 Spot 274	732.429	31816.7	2.42825	20.5912	0.905777	0.142432	1.26047	0.0212802	0.876555	0.69542	135.742	1.17741	135.208	1.59566	125.858	21.3175	135.742	1.17741	100.395
-WFBVR-DC19-01 Spot 256	458.721	19175.4	1.32507	20.7704	1.07372	0.141216	1.47226	0.0212822	1.00731	0.684194	135.754	1.35317	134.127	1.84983	105.376	25.3965	135.754	1.35317	101.214
-WFBVR-DC19-01 Spot 180	1026.32	163646	1.41124	20.5064	0.914696	0.143321	1.37707	0.0213249	1.0294	0.747527	136.024	1.38556	135.998	1.75279	135.55	21.5013	136.024	1.38556	100.019
-WFBVR-DC19-01 Spot 43	166.327	6622.14	2.36946	20.1847	2.38992	0.145615	2.6749	0.0213264	1.2014	0.449137	136.033	1.61717	138.033	3.45228	172.541	55.7869	136.033	1.61717	98.5513
-WFBVR-DC19-01 Spot 33	139.819	28938.6	2.23334	20.9413	2.46191	0.140507	2.6563	0.0213495	0.997453	0.375505	136.179	1.34408	133.495	3.32282	86.0202	58.379	136.179	1.34408	102.011
-WFBVR-DC19-01 Spot 211	204.44	4.76637e+06	1.56519	20.0859	1.55039	0.146506	1.79112	0.0213518	0.896882	0.500738	136.194	1.20868	138.822	2.32399	183.983	36.1017	136.194	1.20868	98.1067
-WFBVR-DC19-01 Spot 5	293.199	6419.64	2.4363	21.2796	1.95022	0.138326	2.17692	0.0213577	0.967269	0.444329	136.231	1.30389	131.551	2.68602	47.8365	46.5916	136.231	1.30389	103.557
-WFBVR-DC19-01 Spot 212	272.637	8920.37	2.48834	20.9389	1.48573	0.140887	2.38308	0.0214049	1.86324	0.781862	136.529	2.51711	133.834	2.98812	86.2854	35.2191	136.529	2.51711	102.014
-WFBVR-DC19-01 Spot 9	117.803	5753.32	2.75682	20.3869	2.53466	0.144739	2.81092	0.0214104	1.21523	0.432325	136.564	1.64211	137.256	3.60879	149.245	59.427	136.564	1.64211	99.4953
-WFBVR-DC19-01 Spot 231	100.4	3415.56	2.58913	21.0154	2.98264	0.140692	3.15186	0.0214534	1.01888	0.323261	136.835	1.37949	133.66	3.94731	77.5812	70.8707	136.835	1.37949	102.375
-WFBVR-DC19-01 Spot 31	96.1385	10364.8	2.10329	19.6677	3.64011	0.150359	3.84159	0.0214571	1.22777	0.319601	136.858	1.6626	142.229	5.09848	232.817	84.0425	136.858	1.6626	96.2239
-WFBVR-DC19-01 Spot 156	339.768	234608	1.97599	21.1336	1.12	0.140305	1.66209	0.0215146	1.22807	0.738871	137.221	1.66736	133.315	2.07652	64.2912	26.6759	137.221	1.66736	102.93
-WFBVR-DC19-01 Spot 63	598.704	19393.9	1.50339	20.5216	1.13667	0.145242	1.44856	0.0216269	0.897947	0.619888	137.929	1.22538	137.703	1.86537	133.794	26.7203	137.929	1.22538	100.165
-WFBVR-DC19-01 Spot 112	372.671	128995	2.2264	20.2038	1.24239	0.147726	1.50215	0.021656	0.844342	0.562088	138.113	1.15374	139.902	1.96319	170.334	29.008	138.113	1.15374	98.7215
-WFBVR-DC19-01 Spot 229	200.505	15868.8	3.81708	20.5648	1.77079	0.145138	2.05996	0.0216567	1.05248	0.510924	138.118	1.4382	137.61	2.65102	128.877	41.6441	138.118	1.4382	100.369
-WFBVR-DC19-01 Spot 146	377.433	139099	1.89888	20.0605	0.865067	0.148977	1.2849	0.0216846	0.950064	0.739408	138.294	1.29989	141.009	1.69164	186.928	20.1373	138.294	1.29989	98.0746
-WFBVR-DC19-01 Spot 219	200.29	70922.8	2.70824	20.396	1.79616	0.14741	2.08749	0.0218151	1.06368	0.509548	139.117	1.46391	139.622	2.72309	148.19	42.1353	139.117	1.46391	99.6386
-WFBVR-DC19-01 Spot 195	383.956	46370.1	1.42005	20.0449	1.11843	0.150022	1.46033	0.0218197	0.938988	0.642995	139.146	1.29257	141.932	1.93434	188.738	26.0392	139.146	1.29257	98.0375
-WFBVR-DC19-01 Spot 60	315.982	92528.4	2.42574	20.0883	1.22255	0.149918	1.48319	0.0218516	0.839772	0.566193	139.348	1.15765	141.84	1.96343	183.713	28.4654	139.348	1.15765	98.2432
-WFBVR-DC19-01 Spot 165	791.145	127315	2.01571	20.2856	0.835522	0.148578	1.32057	0.021869	1.02264	0.774397	139.458	1.41084	140.655	1.73454	160.914	19.5417	139.458	1.41084	99.1484
-WFBVR-DC19-01 Spot 292	396.15	32566.2	5.92101	20.2038	1.30699	0.149507	1.76249	0.021917	1.18243	0.670885	139.76	1.63477	141.476	2.32759	170.343	30.5047	139.76	1.63477	98.7868
-WFBVR-DC19-01 Spot 181	172.593	6725.78	2.54172	19.8526	1.98372	0.152182	2.2983	0.0219214	1.16061	0.504989	139.788	1.60493	143.837	3.08233	211.134	45.9994	139.788	1.60493	97.185
-WFBVR-DC19-01 Spot 254	291.317	15067.3	1.26086	20.5918	1.4762	0.146878	1.86009	0.0219452	1.1317	0.608414	139.938	1.56662	139.152	2.41882	125.741	34.7642	139.938	1.56662	100.565
-WFBVR-DC19-01 Spot 27	123.772	44426.9	1.44348	19.1081	2.15416	0.158512	2.43247	0.0219769	1.12983	0.464479	140.138	1.56624	149.4	3.37941	299.011	49.1642	140.138	1.56624	93.8007
-WFBVR-DC19-01 Spot 90	174.563	9421.92	1.73596	18.883	3.06275	0.161062	3.25257	0.0220674	1.09487	0.336617	140.709	1.52388	151.632	4.58138	325.978	69.5207	140.709	1.52388	92.796
-WFBVR-DC19-01 Spot 50	517.259	67875	1.8811	20.2704	0.919541	0.152763	1.29154	0.0224682	0.906928	0.702207	143.236	1.28472	144.349	1.73787	162.649	21.4919	143.236	1.28472	99.2293
-WFBVR-DC19-01 Spot 137	155.007	8901.8	1.26162	20.3302	2.49986	0.152395	2.70992	0.0224802	1.04613	0.386036	143.312	1.48268	144.025	3.6388	155.764	58.5269	143.312	1.48268	99.5051
-WFBVR-DC19-01 Spot 143	340.309	14309.3	4.3017	20.4215	1.68368	0.152573	1.85519	0.0226075	0.779082	0.419947	144.115	1.11031	144.181	2.49362	145.259	39.4966	144.115	1.11031	99.9536
-WFBVR-DC19-01 Spot 233	384.976	16592.4	3.66433	20.7008	0.998932	0.150957	1.30483	0.022674	0.839476	0.64336	144.533	1.19982	142.757	1.73772	113.328	23.5893	144.533	1.19982	101.245
-WFBVR-DC19-01 Spot 84	93.5849	4818.13	2.49277	20.4376	3.98983	0.153253	4.11306	0.0227262	0.999235	0.242942	144.863	1.43138	144.78	5.54989	143.422	93.6562	144.863	1.43138	100.057
-WFBVR-DC19-01 Spot 258	275.625	13910.7	2.55132	21.2596	1.23724	0.14768	1.53157	0.0227806	0.902755	0.589429	145.205	1.29619	139.862	2.00111	50.1025	29.534	145.205	1.29619	103.821
-WFBVR-DC19-01 Spot 158	48.4635	1572.65	2.78488	25.1705	8.48035	0.12503	8.55784	0.0228346	1.14908	0.134273	145.546	1.6537	119.622	9.65732	NA	NA	145.546	1.6537	121.672
-WFBVR-DC19-01 Spot 65	91.0639	94208.4	7.14311	21.195	2.13747	0.148955	2.4648	0.0229074	1.22737	0.497961	146.005	1.77188	140.989	3.24462	57.3333	50.9821	146.005	1.77188	103.558
-WFBVR-DC19-01 Spot 103	493.01	1.65103e+06	3.43178	20.2147	1.01789	0.15658	1.38445	0.0229664	0.938409	0.67782	146.376	1.35813	147.705	1.90314	169.079	23.7731	146.376	1.35813	99.1001
-WFBVR-DC19-01 Spot 87	83.0296	8299.28	2.54598	19.0185	3.04286	0.167248	3.25381	0.0230795	1.15252	0.354206	147.089	1.67604	157.028	4.73395	309.73	69.2733	147.089	1.67604	93.6705
-WFBVR-DC19-01 Spot 186	966.035	17428	1.74001	20.5231	0.782876	0.15503	1.22961	0.0230858	0.948178	0.771122	147.129	1.37925	146.344	1.67579	133.649	18.3963	147.129	1.37925	100.537
-WFBVR-DC19-01 Spot 78	192.027	13130.2	2.3123	20.3693	1.35952	0.156604	1.63419	0.0231454	0.90679	0.554887	147.504	1.32237	147.726	2.24673	151.262	31.8333	147.504	1.32237	99.8501
-WFBVR-DC19-01 Spot 86	135.353	3886.86	1.48375	23.0099	2.12302	0.139318	2.32553	0.02326	0.949138	0.408139	148.226	1.39082	132.436	2.88745	NA	NA	148.226	1.39082	111.923
-WFBVR-DC19-01 Spot 51	580.972	93970.3	9.49304	20.393	1.04965	0.158419	1.50548	0.023441	1.07921	0.716854	149.366	1.59344	149.318	2.09048	148.529	24.6077	149.366	1.59344	100.032
-WFBVR-DC19-01 Spot 173	171.227	8752.12	1.75871	21.7323	2.44993	0.15512	2.59687	0.0244602	0.861166	0.331616	155.783	1.32547	146.423	3.54098	NA	NA	155.783	1.32547	106.393
-WFBVR-DC19-01 Spot 282	1705.63	287891	2.83867	20.4004	0.642353	0.166402	1.09264	0.0246311	0.883875	0.808938	156.858	1.3697	156.291	1.58276	147.701	15.0385	156.858	1.3697	100.363
-WFBVR-DC19-01 Spot 268	579.242	71392.4	4.75221	20.5872	1.06846	0.166394	1.67936	0.0248554	1.29563	0.7715	158.269	2.02562	156.284	2.43258	126.313	25.1563	158.269	2.02562	101.27
-WFBVR-DC19-01 Spot 227	488.32	739329	1.17239	20.1149	0.966471	0.172555	1.55605	0.0251844	1.21952	0.783727	160.339	1.93124	161.634	2.32514	180.626	22.5147	160.339	1.93124	99.1988
-WFBVR-DC19-01 Spot 0	849.278	34118.5	1.19931	20.2653	0.918572	0.172225	1.24091	0.0253243	0.83432	0.672344	161.218	1.32839	161.348	1.85122	163.24	21.4559	161.218	1.32839	99.9192
-WFBVR-DC19-01 Spot 182	151.112	10887.2	4.17785	21.1591	1.61633	0.16808	1.95602	0.0258048	1.10159	0.563178	164.238	1.78638	157.751	2.85791	61.3741	38.5042	164.238	1.78638	104.112
-WFBVR-DC19-01 Spot 199	516.963	25006.6	1.68578	20.0724	0.9198	0.177386	1.33368	0.0258349	0.96575	0.724124	164.428	1.56788	165.809	2.04025	185.546	21.4367	164.428	1.56788	99.1671
-WFBVR-DC19-01 Spot 188	357.141	31873.2	2.14738	20.0742	1.38222	0.177462	1.57107	0.0258483	0.746823	0.475359	164.512	1.21307	165.874	2.40428	185.339	32.2016	164.512	1.21307	99.1786
-WFBVR-DC19-01 Spot 161	386.288	106926	1.19912	20.287	0.975806	0.175625	1.28721	0.025852	0.839479	0.652167	164.535	1.36376	164.289	1.95254	160.748	22.8247	164.535	1.36376	100.149
-WFBVR-DC19-01 Spot 128	554.031	43729.6	1.58375	20.4625	0.791337	0.174481	1.25804	0.0259057	0.977988	0.777387	164.872	1.59199	163.3	1.8977	140.589	18.5721	164.872	1.59199	100.963
-WFBVR-DC19-01 Spot 169	939.03	1.48483e+06	1.14997	20.0832	0.945614	0.177973	1.4578	0.0259343	1.1095	0.76108	165.052	1.80802	166.315	2.23639	184.298	22.0299	165.052	1.80802	99.2409
-WFBVR-DC19-01 Spot 297	139.149	6436.02	2.11595	21.363	2.99493	0.167592	3.10175	0.025978	0.807011	0.260179	165.326	1.31724	157.327	4.52067	38.4715	71.6759	165.326	1.31724	105.084
-WFBVR-DC19-01 Spot 163	442.427	138252	1.3724	19.9286	1.21991	0.180214	1.48893	0.0260587	0.85365	0.573332	165.834	1.39759	168.245	2.30851	202.296	28.3191	165.834	1.39759	98.567
-WFBVR-DC19-01 Spot 26	820.824	43587.6	3.56363	20.6348	0.915437	0.174216	1.31875	0.0260842	0.949257	0.719813	165.994	1.55559	163.071	1.98671	120.87	21.5803	165.994	1.55559	101.792
-WFBVR-DC19-01 Spot 7	317.229	41622.6	1.70103	20.0688	1.2581	0.179342	2.00758	0.0261151	1.56448	0.779284	166.188	2.56675	167.494	3.0999	185.967	29.2865	166.188	2.56675	99.2202
-WFBVR-DC19-01 Spot 129	734.395	61169	1.33627	20.282	0.864654	0.177485	1.34155	0.0261192	1.02573	0.764589	166.214	1.68312	165.894	2.05326	161.336	20.2123	166.214	1.68312	100.193
-WFBVR-DC19-01 Spot 201	357.438	53139.2	2.66144	19.9089	0.94215	0.180864	1.51551	0.0261268	1.18706	0.783277	166.261	1.94839	168.804	2.3569	204.613	21.8643	166.261	1.94839	98.494
-WFBVR-DC19-01 Spot 191	375.156	97471.9	1.30012	19.5699	1.07408	0.184008	1.4338	0.0261285	0.94981	0.662442	166.272	1.55907	171.504	2.26257	244.293	24.7361	166.272	1.55907	96.9496
-WFBVR-DC19-01 Spot 187	463.07	34493.7	2.79763	20.0793	1.02077	0.179375	1.33517	0.0261335	0.86064	0.644593	166.304	1.41297	167.523	2.06194	184.757	23.7824	166.304	1.41297	99.2723
-WFBVR-DC19-01 Spot 259	579.602	12223.5	1.52528	20.809	1.15023	0.173165	1.55303	0.0261456	1.04349	0.671909	166.38	1.71395	162.162	2.32762	100.995	27.2209	166.38	1.71395	102.601
-WFBVR-DC19-01 Spot 185	400.413	128411	2.25819	19.8188	1.15702	0.181897	1.55405	0.0261572	1.03748	0.667601	166.453	1.70481	169.692	2.42852	215.122	26.798	166.453	1.70481	98.0911
-WFBVR-DC19-01 Spot 251	633.588	163178	1.4031	20.0983	0.969718	0.179622	1.30282	0.0261943	0.870057	0.667824	166.685	1.43167	167.735	2.01434	182.55	22.5864	166.685	1.43167	99.3741
-WFBVR-DC19-01 Spot 71	703.825	247955	2.38464	19.9528	0.80529	0.181041	1.27382	0.0262101	0.986973	0.774816	166.785	1.62501	168.956	1.98266	199.484	18.7091	166.785	1.62501	98.7151
-WFBVR-DC19-01 Spot 221	167.251	16789.6	2.42287	20.1768	1.95353	0.179075	2.13021	0.0262165	0.849436	0.398756	166.825	1.39889	167.264	3.28509	173.46	45.5907	166.825	1.39889	99.7375
-WFBVR-DC19-01 Spot 209	313.865	21533.4	1.74557	20.2607	1.38794	0.178355	1.76941	0.0262197	1.09748	0.620249	166.845	1.80759	166.644	2.71938	163.769	32.4677	166.845	1.80759	100.121
-WFBVR-DC19-01 Spot 15	139.604	4338.6	2.08905	21.6929	1.72429	0.166751	1.93046	0.0262466	0.868061	0.449664	167.014	1.43117	156.595	2.80145	1.69773	41.5337	167.014	1.43117	106.653
-WFBVR-DC19-01 Spot 145	273.922	26920.3	2.01911	20.6796	1.3901	0.174956	1.75259	0.0262518	1.06734	0.609005	167.047	1.76005	163.711	2.64984	115.727	32.8106	167.047	1.76005	102.037
-WFBVR-DC19-01 Spot 120	127.595	4136.64	2.25593	21.5119	1.67415	0.168256	1.95326	0.0262624	1.0062	0.51514	167.114	1.65989	157.904	2.85642	21.8785	40.1895	167.114	1.65989	105.833
-WFBVR-DC19-01 Spot 64	704.813	1.83599e+06	1.2687	19.9476	0.757957	0.181518	1.41407	0.0262722	1.19377	0.844211	167.175	1.97004	169.366	2.20587	200.105	17.6241	167.175	1.97004	98.7065
-WFBVR-DC19-01 Spot 48	636.797	264169	1.41212	20.1014	0.979324	0.180288	1.36852	0.0262955	0.955912	0.698501	167.321	1.57886	168.308	2.12256	182.184	22.8151	167.321	1.57886	99.4136
-WFBVR-DC19-01 Spot 134	254.205	12400.2	2.59361	20.4456	1.63158	0.177346	1.93416	0.0263093	1.03871	0.537034	167.408	1.71649	165.774	2.95828	142.507	38.2802	167.408	1.71649	100.986
-WFBVR-DC19-01 Spot 197	377.873	22512.5	1.84903	20.4712	1.03969	0.177143	1.62996	0.0263122	1.25531	0.770151	167.426	2.07466	165.599	2.49059	139.55	24.3923	167.426	2.07466	101.103
-WFBVR-DC19-01 Spot 184	181.004	10355.7	1.98871	21.0083	1.81565	0.172632	2.0565	0.0263148	0.965713	0.46959	167.443	1.59619	161.701	3.07412	78.3908	43.1339	167.443	1.59619	103.551
-WFBVR-DC19-01 Spot 246	379.353	36792.5	2.78901	20.1701	1.34222	0.180064	1.6319	0.0263527	0.928196	0.568783	167.68	1.53634	168.116	2.5284	174.229	31.3234	167.68	1.53634	99.7409
-WFBVR-DC19-01 Spot 170	623.422	33398.8	1.32496	20.4625	1.02998	0.177652	1.39183	0.0263765	0.936121	0.672585	167.83	1.55082	166.038	2.13191	140.588	24.1677	167.83	1.55082	101.079
-WFBVR-DC19-01 Spot 160	890.288	176161	2.5168	20.3509	0.868035	0.178656	1.27845	0.0263808	0.938594	0.734164	167.857	1.55516	166.903	1.96764	153.403	20.325	167.857	1.55516	100.572
-WFBVR-DC19-01 Spot 267	454.818	41026.2	1.4602	20.589	1.09524	0.176775	1.41009	0.0264085	0.888155	0.629855	168.031	1.4731	165.282	2.15083	126.109	25.7842	168.031	1.4731	101.663
-WFBVR-DC19-01 Spot 228	555.871	15055.3	1.49943	20.5763	1.08916	0.177057	1.42163	0.0264342	0.913651	0.642679	168.193	1.51682	165.525	2.17136	127.562	25.6282	168.193	1.51682	101.612
-WFBVR-DC19-01 Spot 11	226.469	6194.31	1.84327	21.2643	1.72219	0.171341	2.01523	0.0264363	1.04653	0.51931	168.206	1.73755	160.582	2.99319	49.5868	41.1263	168.206	1.73755	104.748
-WFBVR-DC19-01 Spot 215	148.496	52643	2.2301	20.3302	2.13345	0.179319	2.38303	0.0264519	1.06172	0.445534	168.304	1.76379	167.475	3.67924	155.76	49.9641	168.304	1.76379	100.495
-WFBVR-DC19-01 Spot 196	353.714	27851.3	1.64645	20.2674	0.994247	0.179929	1.33788	0.0264598	0.895203	0.669122	168.353	1.4876	168	2.07154	162.999	23.2434	168.353	1.4876	100.21
-WFBVR-DC19-01 Spot 91	390.496	110073	1.86046	20.482	1.05785	0.178091	1.60883	0.0264669	1.21215	0.753433	168.398	2.0148	166.417	2.46948	138.329	24.8266	168.398	2.0148	101.19
-WFBVR-DC19-01 Spot 14	465.533	35888.5	1.57273	20.1848	1.07286	0.180828	1.381	0.0264837	0.869552	0.629655	168.503	1.44624	168.773	2.14735	172.531	25.0511	168.503	1.44624	99.8403
-WFBVR-DC19-01 Spot 171	193.432	5201.25	2.23979	20.5732	1.58101	0.177479	1.8075	0.0264933	0.876037	0.484669	168.564	1.45754	165.889	2.76632	127.913	37.2055	168.564	1.45754	101.612
-WFBVR-DC19-01 Spot 141	386.374	317051	1.80573	20.2546	1.25226	0.180337	1.62827	0.0265031	1.04072	0.639159	168.625	1.73217	168.35	2.52602	164.467	29.2914	168.625	1.73217	100.163
-WFBVR-DC19-01 Spot 127	504.292	144663	1.26637	20.3426	0.909268	0.179569	1.40074	0.0265049	1.06551	0.760674	168.636	1.77353	167.689	2.16519	154.325	21.2855	168.636	1.77353	100.565
-WFBVR-DC19-01 Spot 108	319.233	117362	1.81582	20.2038	1.22858	0.180909	1.54436	0.0265205	0.935756	0.605918	168.734	1.55846	168.842	2.40228	170.334	28.6931	168.734	1.55846	99.936
-WFBVR-DC19-01 Spot 250	264.198	115035	1.62138	19.8816	1.38326	0.183911	1.75454	0.0265305	1.07935	0.615174	168.797	1.79827	171.42	2.76747	207.747	32.0891	168.797	1.79827	98.47
-WFBVR-DC19-01 Spot 70	337.73	6835.58	2.27199	21.2669	1.32524	0.171963	1.66835	0.0265354	1.01347	0.60747	168.828	1.68881	161.121	2.48563	49.2531	31.6488	168.828	1.68881	104.784
-WFBVR-DC19-01 Spot 116	146.909	5338.68	1.84634	21.0351	1.62993	0.173934	2.02484	0.0265471	1.20137	0.593318	168.901	2.00278	162.827	3.04622	75.3562	38.759	168.901	2.00278	103.731
-WFBVR-DC19-01 Spot 80	596.464	13998.6	2.37022	20.6396	0.953604	0.177404	1.48646	0.0265676	1.14027	0.767102	169.03	1.90235	165.824	2.27417	120.32	22.4634	169.03	1.90235	101.933
-WFBVR-DC19-01 Spot 198	357.054	16945.4	2.589	20.8841	1.17327	0.175492	1.47308	0.0265926	0.890724	0.604668	169.187	1.48738	164.174	2.23303	92.4896	27.7896	169.187	1.48738	103.053
-WFBVR-DC19-01 Spot 277	323.766	9896.09	1.8084	21.1036	0.978608	0.173679	1.52052	0.0265945	1.16374	0.765361	169.199	1.94343	162.607	2.28465	67.6746	23.2996	169.199	1.94343	104.054
-WFBVR-DC19-01 Spot 154	89.4835	3714.16	2.95172	21.4094	2.45488	0.171204	2.61006	0.0265954	0.886572	0.339675	169.205	1.48061	160.464	3.87405	33.3305	58.7947	169.205	1.48061	105.447
-WFBVR-DC19-01 Spot 164	376.789	15474.8	3.26844	20.6551	1.07471	0.177523	1.29864	0.0266054	0.72901	0.561365	169.267	1.21792	165.927	1.98794	118.533	25.3358	169.267	1.21792	102.013
-WFBVR-DC19-01 Spot 58	490.982	53585.8	1.98102	20.3726	1.06535	0.180024	1.38143	0.0266112	0.879417	0.6366	169.304	1.46951	168.081	2.13992	150.901	24.9415	169.304	1.46951	100.727
-WFBVR-DC19-01 Spot 290	690.142	98059	2.88574	20.0034	0.989985	0.183384	1.50498	0.0266167	1.13353	0.753186	169.338	1.89451	170.969	2.36809	193.608	23.0392	169.338	1.89451	99.0465
-WFBVR-DC19-01 Spot 206	1814.37	2.46595e+06	1.40181	20.0054	0.7264	0.183415	1.27911	0.0266239	1.05284	0.823102	169.384	1.76012	170.995	2.01297	193.371	16.8903	169.384	1.76012	99.0576
-WFBVR-DC19-01 Spot 287	611.374	106540	1.28276	20.0167	0.843592	0.183342	1.20244	0.0266283	0.856861	0.712603	169.411	1.43271	170.932	1.89167	192.059	19.6196	169.411	1.43271	99.1101
-WFBVR-DC19-01 Spot 130	250.564	9341.79	2.8202	21.0375	1.60496	0.174488	1.84031	0.0266346	0.900459	0.489298	169.451	1.50596	163.306	2.77612	75.0917	38.1609	169.451	1.50596	103.763
-WFBVR-DC19-01 Spot 44	1058.64	90595.6	2.12887	20.1707	0.766093	0.18215	1.11938	0.0266586	0.816161	0.729117	169.602	1.36617	169.909	1.75132	174.167	17.8886	169.602	1.36617	99.8191
-WFBVR-DC19-01 Spot 249	403.721	133677	1.6164	20.0795	1.00878	0.183037	1.35208	0.0266673	0.900275	0.665844	169.656	1.50745	170.67	2.12409	184.726	23.5035	169.656	1.50745	99.4059
-WFBVR-DC19-01 Spot 142	196.377	7891.62	1.8279	21.0869	1.37331	0.174465	1.56258	0.0266937	0.745441	0.477058	169.822	1.2494	163.287	2.3569	69.5097	32.6878	169.822	1.2494	104.003
-WFBVR-DC19-01 Spot 167	1649.77	100219	2.19411	20.2274	0.706925	0.181942	1.10885	0.0267031	0.854292	0.770428	169.881	1.43233	169.731	1.73317	167.609	16.493	169.881	1.43233	100.089
-WFBVR-DC19-01 Spot 133	459.959	119515	2.00406	19.8734	0.915942	0.18521	1.12392	0.026707	0.651346	0.579529	169.905	1.09221	172.534	1.78335	208.735	21.2365	169.905	1.09221	98.4765
-WFBVR-DC19-01 Spot 270	277.638	37011.9	1.51975	18.9139	1.32482	0.19482	1.57735	0.0267364	0.856077	0.542733	170.09	1.43706	180.734	2.6115	322.305	30.1171	170.09	1.43706	94.1108
-WFBVR-DC19-01 Spot 2	292.945	12574.9	1.38429	20.824	1.25924	0.17702	1.52404	0.026747	0.85848	0.563294	170.157	1.44165	165.493	2.32737	99.31	29.8114	170.157	1.44165	102.818
-WFBVR-DC19-01 Spot 36	499.936	11664	1.64806	15.3125	3.38863	0.240843	3.53337	0.0267589	1.00096	0.283286	170.231	1.68164	219.111	6.96376	783.284	71.2043	170.231	1.68164	77.6918
-WFBVR-DC19-01 Spot 57	342.227	34476.3	2.22153	20.5149	1.19458	0.17978	1.47899	0.0267607	0.872011	0.589598	170.243	1.4651	167.871	2.28843	134.56	28.0547	170.243	1.4651	101.413
-WFBVR-DC19-01 Spot 131	2130.59	507728	1.15467	20.2995	0.54795	0.181725	1.01181	0.0267663	0.8506	0.840668	170.278	1.42942	169.544	1.5799	159.306	12.7976	170.278	1.42942	100.433
-WFBVR-DC19-01 Spot 21	659.041	34903.7	2.16389	20.3476	1.05854	0.181426	1.49215	0.0267856	1.05167	0.704801	170.399	1.76855	169.287	2.32668	153.769	24.7696	170.399	1.76855	100.657
-WFBVR-DC19-01 Spot 76	563.566	29979.9	1.18721	20.4232	0.907919	0.180803	1.29322	0.0267927	0.920921	0.712116	170.444	1.54908	168.751	2.01062	145.056	21.2984	170.444	1.54908	101.003
-WFBVR-DC19-01 Spot 159	498.255	44050.6	3.14169	19.9714	1.20774	0.184923	1.57561	0.0267971	1.01188	0.642216	170.471	1.70236	172.288	2.49679	197.326	28.0838	170.471	1.70236	98.9452
-WFBVR-DC19-01 Spot 247	226.332	27491.1	2.69544	20.2686	1.25342	0.182271	1.85617	0.0268058	1.36905	0.737567	170.526	2.30398	170.013	2.90569	162.856	29.319	170.526	2.30398	100.302
-WFBVR-DC19-01 Spot 294	606.474	22491.1	1.69039	20.3083	1.13961	0.182165	1.39187	0.0268427	0.799122	0.574134	170.758	1.34665	169.922	2.1778	158.311	26.6657	170.758	1.34665	100.492
-WFBVR-DC19-01 Spot 136	731.437	112896	2.60549	20.2237	0.832983	0.182994	1.17677	0.0268524	0.831216	0.706356	170.819	1.40122	170.633	1.84831	168.044	19.4353	170.819	1.40122	100.109
-WFBVR-DC19-01 Spot 29	694.063	83878.8	1.3315	20.5151	0.854496	0.180431	1.47836	0.0268579	1.20639	0.816034	170.853	2.03408	168.431	2.29446	134.55	20.107	170.853	2.03408	101.438
-WFBVR-DC19-01 Spot 38	206.284	54616.9	2.72049	20.2404	1.34221	0.182883	1.72536	0.0268585	1.08414	0.628353	170.856	1.82798	170.539	2.70859	166.111	31.3678	170.856	1.82798	100.186
-WFBVR-DC19-01 Spot 210	1865.57	87316.1	1.41504	19.9531	0.59232	0.185573	1.08205	0.0268666	0.905538	0.836869	170.907	1.5273	172.845	1.71975	199.414	13.7791	170.907	1.5273	98.8792
-WFBVR-DC19-01 Spot 252	435.502	52497.3	1.26052	20.1204	0.916468	0.18412	1.16726	0.0268798	0.722902	0.619314	170.99	1.21984	171.6	1.84291	179.987	21.3456	170.99	1.21984	99.6449
-WFBVR-DC19-01 Spot 39	525.497	73692.3	1.42948	20.6517	1.17667	0.179408	1.53264	0.0268835	0.982054	0.64076	171.014	1.65736	167.551	2.36727	118.897	27.7427	171.014	1.65736	102.066
-WFBVR-DC19-01 Spot 202	409.288	13418.9	1.35143	20.2283	1.09925	0.183222	1.4164	0.0268921	0.893216	0.630626	171.068	1.50791	170.829	2.22703	167.507	25.6885	171.068	1.50791	100.14
-WFBVR-DC19-01 Spot 257	286.668	207406	2.39129	19.88	1.02202	0.186439	1.3109	0.0268931	0.820936	0.626237	171.074	1.38594	173.586	2.09167	207.929	23.7	171.074	1.38594	98.5528
-WFBVR-DC19-01 Spot 193	370.859	87932.7	1.72311	19.0429	1.04828	0.194907	1.37828	0.0269308	0.894855	0.649255	171.311	1.51279	180.808	2.28277	306.823	23.8757	171.311	1.51279	94.7473
-WFBVR-DC19-01 Spot 148	422.539	107117	1.50826	20.1659	0.995014	0.184136	1.33008	0.0269429	0.88264	0.6636	171.387	1.49279	171.613	2.10012	174.719	23.2014	171.387	1.49279	99.8678
-WFBVR-DC19-01 Spot 262	84.4654	4379.89	2.6374	18.8878	3.12501	0.196636	3.2148	0.0269483	0.754487	0.234692	171.421	1.2763	182.276	5.364	325.431	70.9505	171.421	1.2763	94.0446
-WFBVR-DC19-01 Spot 75	246.005	67019.3	1.18533	19.7571	1.65102	0.188047	1.91095	0.0269574	0.962207	0.503524	171.477	1.62822	174.961	3.07123	222.307	38.21	171.477	1.62822	98.0087
-WFBVR-DC19-01 Spot 151	404.361	18768.2	1.55264	20.3617	1.15616	0.182562	1.45526	0.026972	0.883789	0.607305	171.569	1.49631	170.263	2.28118	152.131	27.0867	171.569	1.49631	100.767
-WFBVR-DC19-01 Spot 19	1409.1	209838	1.13135	20.3279	0.75126	0.182899	1.10834	0.0269768	0.814873	0.735222	171.599	1.37987	170.552	1.74006	156.024	17.5758	171.599	1.37987	100.614
-WFBVR-DC19-01 Spot 200	157.786	16276.4	2.06953	20.7374	1.99665	0.17942	2.21737	0.0269969	0.964428	0.434942	171.725	1.6343	167.561	3.42509	109.159	47.147	171.725	1.6343	102.485
-WFBVR-DC19-01 Spot 189	658.347	65339.5	0.675897	20.5086	0.716307	0.181447	1.24255	0.0270007	1.01529	0.817109	171.749	1.72074	169.305	1.93767	135.284	16.8123	171.749	1.72074	101.444
-WFBVR-DC19-01 Spot 49	435.427	152226	1.70319	20.0713	1.14436	0.185435	1.5157	0.0270057	0.993869	0.655716	171.781	1.68473	172.727	2.40746	185.684	26.637	171.781	1.68473	99.4521
-WFBVR-DC19-01 Spot 4	174.012	27742.3	2.09525	20.4015	1.55701	0.182471	2.00668	0.0270112	1.26589	0.630838	171.815	2.14627	170.184	3.14422	147.568	36.4874	171.815	2.14627	100.958
-WFBVR-DC19-01 Spot 85	396.708	15522.2	1.72521	20.757	1.26028	0.179412	1.47933	0.0270211	0.77466	0.523657	171.878	1.31387	167.555	2.28497	106.946	29.7975	171.878	1.31387	102.58
-WFBVR-DC19-01 Spot 77	1979.57	18488.4	1.30081	16.9362	2.84697	0.220066	3.01517	0.0270431	0.992974	0.329327	172.016	1.68548	201.965	5.52224	567.836	62.0058	172.016	1.68548	85.171
-WFBVR-DC19-01 Spot 93	143.028	106151	3.20839	18.9483	3.34937	0.197399	3.54885	0.0271397	1.17306	0.330546	172.622	1.99808	182.923	5.94059	318.128	76.1367	172.622	1.99808	94.3683
-WFBVR-DC19-01 Spot 138	233.83	18381.8	2.47784	20.6468	1.66327	0.181254	2.03496	0.0271536	1.17243	0.576143	172.709	1.998	169.139	3.17052	119.478	39.2275	172.709	1.998	102.111
-WFBVR-DC19-01 Spot 61	273.586	87206.6	1.71826	20.207	1.18335	0.185306	1.50409	0.0271693	0.92843	0.61727	172.808	1.58308	172.616	2.38761	169.969	27.6161	172.808	1.58308	100.111
-WFBVR-DC19-01 Spot 98	1453.61	110309	1.26085	20.3	0.751578	0.184522	1.26855	0.0271788	1.02194	0.805594	172.867	1.74313	171.944	2.00653	159.278	17.5685	172.867	1.74313	100.537
-WFBVR-DC19-01 Spot 106	671.72	257988	1.75556	20.3967	0.905874	0.183746	1.35388	0.0271935	1.00618	0.743178	172.96	1.71714	171.279	2.13388	148.117	21.2154	172.96	1.71714	100.981
-WFBVR-DC19-01 Spot 68	268.331	10217	1.57791	20.2659	1.09811	0.184958	1.30818	0.0271974	0.710973	0.543483	172.984	1.21351	172.318	2.07333	163.169	25.6651	172.984	1.21351	100.386
-WFBVR-DC19-01 Spot 18	445.429	24225.6	1.42468	20.3239	0.925911	0.18448	1.25281	0.0272047	0.843935	0.673633	173.03	1.44084	171.908	1.98124	156.503	21.6635	173.03	1.44084	100.652
-WFBVR-DC19-01 Spot 62	370.96	49598.5	1.93009	20.8109	1.08608	0.180606	1.45461	0.0272716	0.967644	0.665225	173.449	1.65599	168.582	2.25946	100.779	25.7114	173.449	1.65599	102.887
-WFBVR-DC19-01 Spot 135	533.19	12226.2	1.21489	14.1351	5.10505	0.266009	5.25726	0.0272824	1.25589	0.238887	173.517	2.15012	239.498	11.2167	949.192	104.557	173.517	2.15012	72.4505
-WFBVR-DC19-01 Spot 97	263.408	23381.6	2.82099	20.2249	1.4041	0.186044	1.70163	0.0273017	0.961279	0.564916	173.639	1.64687	173.248	2.71027	167.899	32.7872	173.639	1.64687	100.225
-WFBVR-DC19-01 Spot 59	164.051	57193.3	1.95932	20.3524	1.45319	0.184916	1.62938	0.0273074	0.736963	0.452296	173.674	1.26283	172.282	2.58191	153.233	34.0278	173.674	1.26283	100.808
-WFBVR-DC19-01 Spot 155	456.581	30701.7	2.44057	20.511	0.994572	0.183552	1.2329	0.0273171	0.728611	0.590972	173.735	1.24895	171.113	1.94147	135.01	23.3673	173.735	1.24895	101.532
-WFBVR-DC19-01 Spot 217	365.14	36036.2	1.97955	19.5776	1.14393	0.192465	1.56355	0.02734	1.06589	0.681711	173.879	1.82858	178.73	2.56241	243.372	26.3397	173.879	1.82858	97.2857
-WFBVR-DC19-01 Spot 149	128.098	22098.5	2.53282	20.7227	1.59716	0.182112	1.88661	0.0273825	1.00417	0.532263	174.145	1.72531	169.877	2.95117	110.81	37.7239	174.145	1.72531	102.513
-WFBVR-DC19-01 Spot 117	641.593	23286.9	2.09318	20.3819	0.910387	0.185339	1.48332	0.0274094	1.17108	0.7895	174.314	2.014	172.645	2.35499	149.825	21.3146	174.314	2.014	100.967
-WFBVR-DC19-01 Spot 225	340.467	646507	2.2312	20.292	1.16334	0.18649	1.41227	0.027458	0.800715	0.566969	174.619	1.37943	173.63	2.25394	160.159	27.2007	174.619	1.37943	100.57
-WFBVR-DC19-01 Spot 122	194.408	8911.43	2.44574	20.9138	2.06676	0.181136	2.22654	0.0274869	0.828247	0.371988	174.801	1.42833	169.038	3.46711	89.1305	48.9804	174.801	1.42833	103.409
-WFBVR-DC19-01 Spot 205	2622.38	198865	0.921982	20.4204	0.488308	0.18574	0.801587	0.0275206	0.635687	0.793035	175.012	1.09756	172.988	1.27496	145.428	11.4704	175.012	1.09756	101.17
-WFBVR-DC19-01 Spot 226	163.237	27150.7	1.996	20.0084	1.63537	0.189706	1.85417	0.027541	0.873786	0.471254	175.14	1.50975	176.378	3.00208	193.032	38.0058	175.14	1.50975	99.298
-WFBVR-DC19-01 Spot 144	240.655	33390.5	2.1394	20.0773	1.19167	0.189457	1.52228	0.0275997	0.947242	0.622252	175.508	1.64006	176.166	2.462	184.984	27.7311	175.508	1.64006	99.6265
-WFBVR-DC19-01 Spot 177	380.695	14080.2	1.79098	20.172	1.25685	0.18866	1.56431	0.0276132	0.931344	0.595369	175.593	1.6133	175.485	2.52102	174.017	29.3282	175.593	1.6133	100.061
-WFBVR-DC19-01 Spot 66	572.214	262225	1.91066	20.2541	1.00803	0.187911	1.38176	0.0276155	0.945062	0.683955	175.607	1.6372	174.846	2.21939	164.532	23.5556	175.607	1.6372	100.436
-WFBVR-DC19-01 Spot 286	760.156	742056	2.55144	20.344	1.00071	0.187337	1.42846	0.0276533	1.01935	0.7136	175.845	1.76824	174.354	2.28848	154.162	23.4133	175.845	1.76824	100.855
-WFBVR-DC19-01 Spot 16	377.868	17565.2	1.2754	19.6025	1.06187	0.195052	1.3141	0.0277428	0.77413	0.589096	176.406	1.34709	180.931	2.17782	240.435	24.4896	176.406	1.34709	97.4989
-WFBVR-DC19-01 Spot 179	115.281	17108.8	0.677133	18.1184	2.60095	0.211141	2.79625	0.0277575	1.02666	0.367158	176.498	1.78746	194.51	4.94979	419.035	58.0922	176.498	1.78746	90.7399
-WFBVR-DC19-01 Spot 289	928.22	82677.8	1.31778	20.1848	0.632687	0.189721	1.09027	0.0277861	0.887921	0.814402	176.678	1.54746	176.392	1.76538	172.535	14.7568	176.678	1.54746	100.162
-WFBVR-DC19-01 Spot 23	688.739	53438.5	1.88584	20.1381	1.26129	0.190489	1.53036	0.0278341	0.866691	0.56633	176.978	1.51299	177.046	2.48639	177.935	29.4069	176.978	1.51299	99.9615
-WFBVR-DC19-01 Spot 223	1047.21	52278	2.23541	20.4943	0.780951	0.187513	1.35467	0.0278838	1.10691	0.817106	177.29	1.9357	174.505	2.17198	136.946	18.3686	177.29	1.9357	101.596
-WFBVR-DC19-01 Spot 213	309.673	105088	2.18833	19.9384	0.871683	0.194435	1.34338	0.0281289	1.02218	0.760898	178.827	1.80281	180.407	2.22046	201.169	20.2609	178.827	1.80281	99.1244
-WFBVR-DC19-01 Spot 124	296.38	88693.4	1.63827	18.5494	1.92836	0.209336	2.10595	0.0281749	0.846432	0.401924	179.115	1.49522	192.995	3.70149	366.291	43.4511	179.115	1.49522	92.8081
-WFBVR-DC19-01 Spot 295	433.648	16806.5	1.42694	20.0489	1.02765	0.19439	1.26367	0.0282783	0.735399	0.581953	179.763	1.30372	180.368	2.0883	188.28	23.9164	179.763	1.30372	99.6646
-WFBVR-DC19-01 Spot 20	748.406	31359.8	2.56494	20.2134	0.607946	0.193213	1.17	0.0283375	0.999647	0.854401	180.135	1.77579	179.367	1.92368	169.232	14.1748	180.135	1.77579	100.428
-WFBVR-DC19-01 Spot 279	473.729	74126.7	1.76928	20.208	1.20715	0.193461	1.37535	0.0283665	0.659073	0.479204	180.317	1.17195	179.578	2.26376	169.851	28.2029	180.317	1.17195	100.411
-WFBVR-DC19-01 Spot 174	1159.67	88056.7	1.39644	19.3779	0.788821	0.20398	1.10836	0.0286801	0.778608	0.702485	182.282	1.39939	188.488	1.90669	266.983	18.0755	182.282	1.39939	96.7075
-WFBVR-DC19-01 Spot 95	83.2854	3990.54	1.41502	22.206	2.32654	0.18051	2.63872	0.0290843	1.245	0.471821	184.815	2.26828	168.499	4.09691	NA	NA	184.815	2.26828	109.683
-WFBVR-DC19-01 Spot 150	1072.12	31701.9	1.552	20.3311	0.818494	0.202485	1.26764	0.0298704	0.967982	0.763607	189.737	1.80986	187.227	2.16741	155.688	19.1628	189.737	1.80986	101.341
-WFBVR-DC19-01 Spot 183	68.0394	6330.29	3.89232	22.2681	2.22484	0.185612	2.57046	0.02999	1.28737	0.500834	190.486	2.41639	172.878	4.08606	NA	NA	190.486	2.41639	110.185
-WFBVR-DC19-01 Spot 284	89.5091	7849.16	3.11029	19.9883	3.03009	0.208644	3.30649	0.0302601	1.32342	0.400248	192.176	2.50575	192.414	5.79575	195.359	70.4437	192.176	2.50575	99.8762
-WFBVR-DC19-01 Spot 265	119.885	10640.8	1.39165	19.7165	2.15146	0.211586	2.34481	0.0302695	0.932369	0.397632	192.234	1.76587	194.883	4.15788	227.092	49.7439	192.234	1.76587	98.6411
-WFBVR-DC19-01 Spot 288	52.1326	5236.99	3.93744	21.2445	2.9709	0.197363	3.1038	0.0304229	0.898519	0.28949	193.194	1.71013	182.893	5.19478	51.7924	70.9041	193.194	1.71013	105.633
-WFBVR-DC19-01 Spot 52	152.221	4875.8	2.6512	20.7966	1.39066	0.201991	1.60121	0.0304798	0.793693	0.495682	193.551	1.51337	186.809	2.73219	102.386	32.8695	193.551	1.51337	103.609
-WFBVR-DC19-01 Spot 166	60.4367	6173.42	5.03117	20.5946	2.56718	0.205217	2.86287	0.0306657	1.26713	0.442608	194.713	2.43038	189.531	4.94974	125.426	60.4486	194.713	2.43038	102.734
-WFBVR-DC19-01 Spot 207	168.416	15698.5	2.26579	18.89	1.43802	0.223858	1.79534	0.0306826	1.07486	0.598696	194.819	2.06271	205.116	3.33442	325.174	32.637	194.819	2.06271	94.98
-WFBVR-DC19-01 Spot 260	64.138	2988.98	2.09788	22.0697	5.57285	0.191621	5.71203	0.0306852	1.25324	0.219403	194.835	2.40522	178.012	9.32691	NA	NA	194.835	2.40522	109.451
-WFBVR-DC19-01 Spot 102	91.0244	4408.26	1.84625	20.6322	2.31572	0.20533	2.45224	0.0307388	0.8068	0.329005	195.17	1.55104	189.626	4.24172	121.141	54.5697	195.17	1.55104	102.924
-WFBVR-DC19-01 Spot 216	97.8701	140267	4.80561	19.077	2.385	0.223364	2.57807	0.0309178	0.978875	0.379694	196.29	1.89248	204.705	4.77952	302.763	54.3506	196.29	1.89248	95.8891
-WFBVR-DC19-01 Spot 296	90.0347	9808.8	2.51462	20.8294	2.15112	0.204899	2.33589	0.0309674	0.910517	0.389795	196.6	1.76305	189.263	4.03342	98.7123	50.9127	196.6	1.76305	103.876
-WFBVR-DC19-01 Spot 47	42.4481	9433.96	3.51229	19.4227	2.45612	0.220838	2.74449	0.0311222	1.22462	0.446211	197.568	2.38276	202.607	5.04093	261.652	56.399	197.568	2.38276	97.5129
-WFBVR-DC19-01 Spot 110	250.957	32074.9	2.2648	19.9903	1.21148	0.214735	1.6665	0.0311464	1.14436	0.686682	197.719	2.22827	197.518	2.99128	195.137	28.1815	197.719	2.22827	100.102
-WFBVR-DC19-01 Spot 94	161.887	6281.07	1.98283	20.5737	2.04277	0.208672	2.3268	0.0311504	1.11405	0.478789	197.744	2.16952	192.438	4.07894	127.858	48.0775	197.744	2.16952	102.758
-WFBVR-DC19-01 Spot 73	70.6331	68156.3	3.33149	19.7631	2.20384	0.217465	2.56017	0.0311841	1.30292	0.508917	197.955	2.53998	199.798	4.64339	221.635	50.9826	197.955	2.53998	99.0775
-WFBVR-DC19-01 Spot 30	85.3196	10216.4	4.87767	21.197	2.46564	0.204202	2.58512	0.0314067	0.776833	0.300501	199.346	1.52489	188.676	4.45118	57.1117	58.7918	199.346	1.52489	105.655
-WFBVR-DC19-01 Spot 34	97.2235	106607	2.37863	20.3518	1.87185	0.212835	2.31864	0.0314293	1.36831	0.590133	199.488	2.6878	195.929	4.1315	153.286	43.8302	199.488	2.6878	101.816
-WFBVR-DC19-01 Spot 40	105.554	8845.46	2.87396	20.2466	1.62425	0.214799	1.86228	0.0315553	0.910981	0.489176	200.275	1.79642	197.572	3.34352	165.397	37.9392	200.275	1.79642	101.368
-WFBVR-DC19-01 Spot 271	67.385	23331.6	2.29815	19.3418	2.21284	0.225065	2.49803	0.0315859	1.15909	0.464002	200.466	2.28783	206.117	4.65993	271.211	50.7551	200.466	2.28783	97.2585
-WFBVR-DC19-01 Spot 293	196.876	75524.9	1.93034	20.313	1.41928	0.21435	1.70437	0.0315926	0.94367	0.553677	200.508	1.86301	197.197	3.05474	157.782	33.2397	200.508	1.86301	101.679
-WFBVR-DC19-01 Spot 238	219.53	42821.7	3.35186	19.8645	1.05235	0.219518	1.46113	0.0316399	1.01365	0.69374	200.803	2.00406	201.508	2.67056	209.786	24.4176	200.803	2.00406	99.6502
-WFBVR-DC19-01 Spot 275	93.1948	6864.19	5.55967	20.7039	1.65708	0.211108	1.86215	0.0317135	0.849521	0.456206	201.264	1.68336	194.482	3.29584	112.984	39.1126	201.264	1.68336	103.487
-WFBVR-DC19-01 Spot 89	59.304	3700.07	3.94679	20.1616	2.89339	0.216831	3.11213	0.0317201	1.14615	0.368286	201.305	2.27161	199.269	5.63097	175.218	67.5187	201.305	2.27161	101.022
-WFBVR-DC19-01 Spot 81	83.4531	6514.23	2.85682	20.087	3.07588	0.218388	3.32706	0.0318297	1.26817	0.381168	201.989	2.52185	200.567	6.05534	183.857	71.6556	201.989	2.52185	100.709
-WFBVR-DC19-01 Spot 1	68.2882	4662.48	2.54324	20.824	2.16599	0.211065	2.40961	0.0318909	1.0558	0.43816	202.372	2.10345	194.446	4.26411	99.3125	51.2625	202.372	2.10345	104.076
-WFBVR-DC19-01 Spot 214	50.6964	5964.43	3.9153	21.1369	2.66099	0.209432	2.914	0.0321198	1.18765	0.407567	203.802	2.38259	193.076	5.12371	63.8975	63.3816	203.802	2.38259	105.555
-WFBVR-DC19-01 Spot 139	158.057	36678.1	2.06764	19.827	1.79414	0.225964	2.06604	0.0325076	1.0245	0.495876	206.223	2.07933	206.862	3.86664	214.163	41.5603	206.223	2.07933	99.6914
-WFBVR-DC19-01 Spot 12	78.8739	14533.5	2.66018	20.1777	2.04099	0.222402	2.34095	0.032561	1.14647	0.489748	206.557	2.33058	203.907	4.32462	173.351	47.6101	206.557	2.33058	101.3
-WFBVR-DC19-01 Spot 172	44.6806	4612.11	2.55797	17.346	5.43334	0.258989	5.58535	0.0325963	1.29417	0.231708	206.777	2.63358	233.852	11.667	515.514	119.431	206.777	2.63358	88.4224
-WFBVR-DC19-01 Spot 74	166.669	169767	4.01762	20.1379	1.23454	0.22528	1.59814	0.0329173	1.01488	0.635036	208.781	2.08492	206.294	2.98355	177.961	28.7686	208.781	2.08492	101.205
-WFBVR-DC19-01 Spot 41	116.376	14267.1	3.90068	20.4608	1.89428	0.22323	2.14714	0.0331408	1.01089	0.470807	210.175	2.09037	204.594	3.97865	140.787	44.4568	210.175	2.09037	102.728
-WFBVR-DC19-01 Spot 266	99.8415	4139.87	2.60962	21.2652	2.1396	0.219751	2.29639	0.0339069	0.833971	0.363167	214.954	1.7631	201.703	4.20085	49.4916	51.0773	214.954	1.7631	106.57
-WFBVR-DC19-01 Spot 123	318.055	112993	2.51102	18.8419	1.13849	0.258794	1.39067	0.0353806	0.798621	0.574271	224.136	1.75924	233.694	2.90305	330.946	25.8089	224.136	1.75924	95.9099
-WFBVR-DC19-01 Spot 99	238.222	49592.2	2.7037	18.9848	1.10908	0.319365	1.47784	0.0439927	0.976713	0.660904	277.534	2.65319	281.414	3.6323	313.784	25.2318	277.534	2.65319	98.6214
-WFBVR-DC19-01 Spot 109	120.141	5592.13	265.619	17.6458	1.60918	0.444574	1.98389	0.056921	1.16032	0.584874	356.873	4.02835	373.473	6.19951	477.764	35.5861	356.873	4.02835	95.5553
-WFBVR-DC19-01 Spot 10	753.197	135094	1.98427	18.6161	0.682969	0.43277	1.20255	0.0584564	0.989784	0.823073	366.231	3.52386	365.141	3.6882	358.202	15.4073	366.231	3.52386	100.299
-WFBVR-DC19-01 Spot 55	624.927	140096	1.83859	18.6418	0.670188	0.434765	1.33753	0.0588073	1.15751	0.865411	368.368	4.14438	366.555	4.11539	355.123	15.1135	368.368	4.14438	100.495
-WFBVR-DC19-01 Spot 162	420.898	294530	1.93592	18.5379	0.785458	0.451598	1.23353	0.0607436	0.951138	0.771067	380.146	3.51117	378.398	3.89663	367.692	17.6812	380.146	3.51117	100.462
-WFBVR-DC19-01 Spot 248	544.783	62676.2	1.50335	18.1633	0.774602	0.461749	1.02868	0.0608541	0.676883	0.658012	380.818	2.50303	385.474	3.29947	413.5	17.3145	380.818	2.50303	98.7921
-WFBVR-DC19-01 Spot 96	565.482	99399.6	1.91807	18.3328	0.777517	0.460979	1.30222	0.0613193	1.04463	0.802189	383.644	3.89073	384.938	4.17209	392.708	17.4437	383.644	3.89073	99.6637
-WFBVR-DC19-01 Spot 126	8.67798	1041.41	34910.6	18.9766	11.5235	0.458517	11.6945	0.0631339	1.99237	0.170368	394.656	7.62717	383.226	37.3467	314.763	262.893	394.656	7.62717	102.983
-WFBVR-DC19-01 Spot 115	193.033	62460.2	3.55339	18.7361	1.07993	0.465068	1.42048	0.063224	0.922774	0.649622	395.203	3.53729	387.776	4.57853	343.681	24.4166	395.203	3.53729	101.915
-WFBVR-DC19-01 Spot 153	329.867	26867.1	3.28166	18.4792	0.884564	0.474692	1.32979	0.0636476	0.992919	0.746673	397.77	3.83016	394.424	4.34637	374.837	19.8947	397.77	3.83016	100.848
-WFBVR-DC19-01 Spot 299	91.395	23025.2	252.892	18.3362	1.29788	0.495619	1.77785	0.0659396	1.21501	0.683418	411.646	4.84521	408.733	5.98214	392.286	29.1206	411.646	4.84521	104.935
-WFBVR-DC19-01 Spot 244	1056.45	49661.7	11.2659	18.0303	0.710628	0.516856	1.13347	0.0676176	0.883042	0.779061	421.786	3.60532	423.049	3.92164	429.915	15.8401	421.786	3.60532	98.1092
-WFBVR-DC19-01 Spot 273	859.449	376164	2.24642	18.1673	0.598338	0.535293	1.00815	0.070562	0.81139	0.804832	439.54	3.44752	435.316	3.56908	413.008	13.3758	439.54	3.44752	106.424
-WFBVR-DC19-01 Spot 54	132.558	99967.1	1.51617	16.3307	0.950628	0.85733	1.2414	0.101588	0.798368	0.643117	623.706	4.74617	628.664	5.81845	646.564	20.4239	623.706	4.74617	96.4648
-WFBVR-DC19-01 Spot 32	335.831	1.42495e+06	1.80883	16.4834	0.711473	0.875411	1.17234	0.1047	0.931764	0.794791	641.894	5.69281	638.501	5.55652	626.49	15.3566	641.894	5.69281	102.459
-WFBVR-DC19-01 Spot 298	569.603	516271	2.53667	16.2554	0.82478	0.913433	1.31747	0.107737	1.02736	0.779797	659.589	6.44122	658.881	6.38617	656.478	17.6699	659.589	6.44122	100.474
-WFBVR-DC19-01 Spot 107	351.759	107894	1.91015	12.7307	0.570531	2.11558	0.930168	0.19542	0.734647	0.789801	1150.67	7.74187	1153.9	6.41339	1159.95	11.3297	1159.95	11.3297	99.2
-WFBVR-DC19-01 Spot 37	149.636	65896.9	1.13575	11.606	0.800972	2.63176	1.17704	0.221625	0.862479	0.732752	1290.46	10.0867	1309.56	8.66087	1340.96	15.4758	1340.96	15.4758	96.2335
-WFBVR-DC19-01 Spot 105	150.292	688401	2.393	11.3348	0.728038	3.05074	1.01418	0.250903	0.706058	0.696187	1443.13	9.12937	1420.42	7.75574	1386.52	13.9783	1386.52	13.9783	104.083
-WFBVR-DC19-01 Spot 92	280.47	86181.1	2.40359	10.9576	0.618346	3.13953	0.963409	0.249614	0.738786	0.766846	1436.48	9.51327	1442.43	7.41928	1451.2	11.7684	1451.2	11.7684	98.9857
-WFBVR-DC19-01 Spot 272	141.615	54042	1.68519	10.138	0.687154	3.78815	1.08213	0.278656	0.835956	0.77251	1584.59	11.744	1590.24	8.69319	1597.71	12.8267	1597.71	12.8267	99.1788
-WFBVR-DC19-01 Spot 13	173.696	367616	1.54516	10.1295	0.586297	3.73722	1.41829	0.274679	1.29143	0.910557	1564.51	17.9398	1579.38	11.3616	1599.28	10.9418	1599.28	10.9418	97.8262
-WFBVR-DC19-01 Spot 242	179.069	295842	1.06739	9.81245	0.653272	4.01999	1.02463	0.286213	0.789362	0.770391	1622.58	11.3233	1638.25	8.33157	1658.4	12.0975	1658.4	12.0975	97.8401
-WFBVR-DC19-01 Spot 276	523.829	146894	2.42612	9.5054	0.788426	4.16898	1.26584	0.287534	0.990323	0.782343	1629.19	14.2569	1667.95	10.3669	1717.05	14.4926	1717.05	14.4926	94.883
-WFBVR-DC19-01 Spot 118	385.48	360965	1.43884	9.438	0.581476	3.96359	1.06579	0.271429	0.893193	0.838057	1548.05	12.2922	1626.77	8.64181	1730.13	10.6721	1730.13	10.6721	89.4762
-WFBVR-DC19-01 Spot 176	608.749	530961	3.02812	9.35994	0.535864	4.54382	1.02382	0.30859	0.872387	0.85209	1733.77	13.2619	1739.03	8.52072	1745.35	9.81455	1745.35	9.81455	99.3363
-WFBVR-DC19-01 Spot 79	424.663	290391	1.99545	9.33394	0.539929	4.62817	1.20285	0.313446	1.07486	0.893595	1757.64	16.5357	1754.36	10.0438	1750.44	9.88275	1750.44	9.88275	100.411
-WFBVR-DC19-01 Spot 243	460.304	273115	3.15196	9.23692	0.521648	4.61496	1.05863	0.309302	0.921186	0.870167	1737.27	14.0284	1751.98	8.83501	1769.55	9.52715	1769.55	9.52715	98.1759
-WFBVR-DC19-01 Spot 35	421.304	376091	29.9326	9.17057	0.512305	4.61988	0.986707	0.307408	0.843288	0.854649	1727.94	12.782	1752.87	8.23628	1782.7	9.33954	1782.7	9.33954	96.928
-WFBVR-DC19-01 Spot 175	553.108	4.96033e+06	0.584341	9.03525	0.517834	4.32345	1.11845	0.283438	0.991348	0.886362	1608.66	14.1133	1697.84	9.22347	1809.76	9.4089	1809.76	9.4089	88.8877
-WFBVR-DC19-01 Spot 255	266.67	1.63499e+06	3.83796	8.92898	0.540349	4.98744	0.91346	0.323123	0.7365	0.806275	1804.96	11.5947	1817.19	7.72617	1831.23	9.7943	1831.23	9.7943	98.5653
-WFBVR-DC19-01 Spot 28	125.367	231922	1.17568	8.92357	0.724624	5.08054	1.18685	0.328955	0.939962	0.791982	1833.32	14.9988	1832.86	10.0695	1832.33	13.1328	1832.33	13.1328	100.054
-WFBVR-DC19-01 Spot 203	124.553	254909	0.804877	8.91107	0.662248	4.60826	1.06117	0.297958	0.829165	0.781367	1681.18	12.2703	1750.77	8.85393	1834.87	11.9985	1834.87	11.9985	91.6237
-WFBVR-DC19-01 Spot 230	216.496	123560	1.74306	8.88831	0.412984	5.17075	0.911871	0.333473	0.81299	0.891562	1855.19	13.1063	1847.81	7.75867	1839.5	7.47812	1839.5	7.47812	100.853
-WFBVR-DC19-01 Spot 140	838.927	290407	1.72868	8.88445	0.568191	4.81545	1.07904	0.310424	0.917323	0.850131	1742.79	14.0083	1787.6	9.0726	1840.29	10.2876	1840.29	10.2876	94.702
-WFBVR-DC19-01 Spot 234	286.156	5.36843e+06	0.841055	8.85494	0.489711	5.24096	0.957138	0.336732	0.822373	0.859199	1870.93	13.3545	1859.3	8.16157	1846.31	8.85823	1846.31	8.85823	101.333
-WFBVR-DC19-01 Spot 224	395.063	2.45618e+08	4.47816	8.84106	0.472585	5.18736	0.833275	0.332766	0.686303	0.82362	1851.77	11.0464	1850.54	7.0936	1849.15	8.54545	1849.15	8.54545	100.142
-WFBVR-DC19-01 Spot 42	90.2345	193346	2.50497	8.82759	0.742347	5.05604	1.27064	0.323848	1.03124	0.811588	1808.49	16.2622	1828.76	10.7719	1851.91	13.4201	1851.91	13.4201	97.6557
-WFBVR-DC19-01 Spot 72	271.892	261854	3.17842	8.81966	0.553934	5.20178	0.901996	0.332883	0.711867	0.789213	1852.34	11.4608	1852.91	7.68207	1853.53	10.0115	1853.53	10.0115	99.9356
-WFBVR-DC19-01 Spot 278	257.64	128480	1.34962	8.81038	0.730027	5.22833	1.15342	0.33423	0.892993	0.774214	1858.85	14.4206	1857.25	9.83155	1855.43	13.1918	1855.43	13.1918	100.184
-WFBVR-DC19-01 Spot 152	159.542	146807	1.09822	8.80607	0.523297	5.17238	0.952403	0.330492	0.795759	0.835527	1840.76	12.7423	1848.08	8.10397	1856.31	9.4545	1856.31	9.4545	99.1623
-WFBVR-DC19-01 Spot 220	234.683	1.15336e+06	3.97437	8.76626	0.477158	5.41949	0.864182	0.344715	0.720508	0.833745	1909.31	11.9066	1887.94	7.408	1864.5	8.61412	1864.5	8.61412	102.404
-WFBVR-DC19-01 Spot 280	33.5458	15014.4	0.609424	8.70507	0.689876	5.5544	1.15391	0.35083	0.92498	0.801602	1938.56	15.4863	1909.06	9.92936	1877.13	12.4354	1877.13	12.4354	103.272
-WFBVR-DC19-01 Spot 24	211.235	323633	0.523259	8.47272	0.594704	5.75129	1.11296	0.353571	0.940751	0.845268	1951.63	15.8412	1939.11	9.62724	1925.75	10.6559	1925.75	10.6559	101.344
-WFBVR-DC19-01 Spot 232	321.73	613751	1.28352	7.74595	0.591417	6.54863	0.949586	0.368055	0.742927	0.782369	2020.24	12.8847	2052.46	8.36482	2084.97	10.4055	2084.97	10.4055	96.8957
-WFBVR-DC19-01 Spot 245	275.894	144700	1.82754	7.71918	0.445245	6.66629	0.886478	0.373373	0.76655	0.864715	2045.25	13.4343	2068.17	7.82718	2091.05	7.8283	2091.05	7.8283	97.8098
-WFBVR-DC19-01 Spot 235	569.889	548629	5.22123	7.56519	0.714474	6.50549	1.07644	0.357098	0.805139	0.747965	1968.4	13.6573	2046.64	9.47399	2126.41	12.5123	2126.41	12.5123	92.5693
-WFBVR-DC19-01 Spot 147	388.229	396006	2.36819	7.00653	0.548833	8.16031	1.19442	0.414856	1.06086	0.888179	2237.09	20.0522	2248.95	10.8044	2259.76	9.46966	2259.76	9.46966	98.9968
-WFBVR-DC19-01 Spot 22	607.828	899902	1.75337	6.9255	0.491413	6.63442	1.56174	0.333381	1.48241	0.949205	1854.75	23.8933	2063.94	13.7814	2279.81	8.46303	2279.81	8.46303	81.3556
-WFBVR-DC19-01 Spot 46	235.449	119691	1.34813	6.86396	0.545656	8.5669	0.885786	0.426664	0.697765	0.787735	2290.66	13.4522	2293.05	8.05416	2295.16	9.37923	2295.16	9.37923	99.8038
-WFBVR-DC19-01 Spot 194	234.858	704487	1.99774	6.19588	0.477824	9.81549	0.903601	0.441269	0.766928	0.848746	2356.32	15.1367	2417.61	8.32688	2469.6	8.06606	2469.6	8.06606	95.4128
-WFBVR-DC19-01 Spot 218	565.373	44804.7	1.75458	5.81994	0.6153	9.65461	1.2221	0.4077	1.0559	0.864008	2204.4	19.714	2402.39	11.2448	2574.74	10.2829	2574.74	10.2829	85.6163
-WFBVR-DC19-01 Spot 132	302.96	331695	1.62928	5.71472	0.521808	10.8407	1.0039	0.44951	0.857635	0.854301	2393.07	17.1451	2509.56	9.33284	2605.18	8.69182	2605.18	8.69182	91.8583
-WFBVR-DC19-01 Spot 121	278.357	178467	1.64229	5.59688	0.512497	12.1061	1.08722	0.49163	0.958848	0.881928	2577.72	20.3726	2612.66	10.1975	2639.84	8.50807	2639.84	8.50807	97.647
-WFBVR-DC19-01 Spot 239	424.797	448931	0.977933	5.54943	0.452755	11.3196	0.984856	0.455793	0.874617	0.888066	2420.96	17.6525	2549.82	9.18859	2653.96	7.50914	2653.96	7.50914	91.2204
-WFBVR-DC19-01 Spot 114	137.849	181728	1.2402	5.50976	0.458236	12.0927	1.54563	0.483441	1.47614	0.955041	2542.24	31.0115	2611.62	14.4964	2665.86	7.59136	2665.86	7.59136	95.3628
-WFBVR-DC19-01 Spot 113	156.907	156778	0.93003	5.48721	0.608248	11.9939	1.05762	0.477528	0.865217	0.818077	2516.49	18.0263	2603.93	9.91278	2672.65	10.07	2672.65	10.07	94.1572
-WFBVR-DC19-01 Spot 204	94.0721	67469.7	1.35306	5.43358	0.561012	12.0324	1.02735	0.474381	0.860646	0.837735	2502.74	17.8509	2606.94	9.63139	2688.89	9.27061	2688.89	9.27061	93.0772
-WFBVR-DC19-01 Spot 17	223.957	97387.2	3.34336	5.36904	0.541815	10.8051	1.61464	0.420932	1.52102	0.942018	2264.71	29.0466	2506.5	15.0071	2708.62	8.94005	2708.62	8.94005	83.611
-WFBVR-DC19-01 Spot 104	259.525	306136	1.12652	5.11001	0.426566	14.1138	0.866471	0.523303	0.754197	0.870424	2713.18	16.7021	2757.38	8.21607	2789.89	6.98256	2789.89	6.98256	97.2502
