# Supplementary material
Source: publisher figshare collection journal article supplement (https://gsapubs.figshare.com/articles/dataset/_/24128652)
Supplement: Supplementary file 1 [file 1]

## eU (ppm) vs. AHe cooling grain age

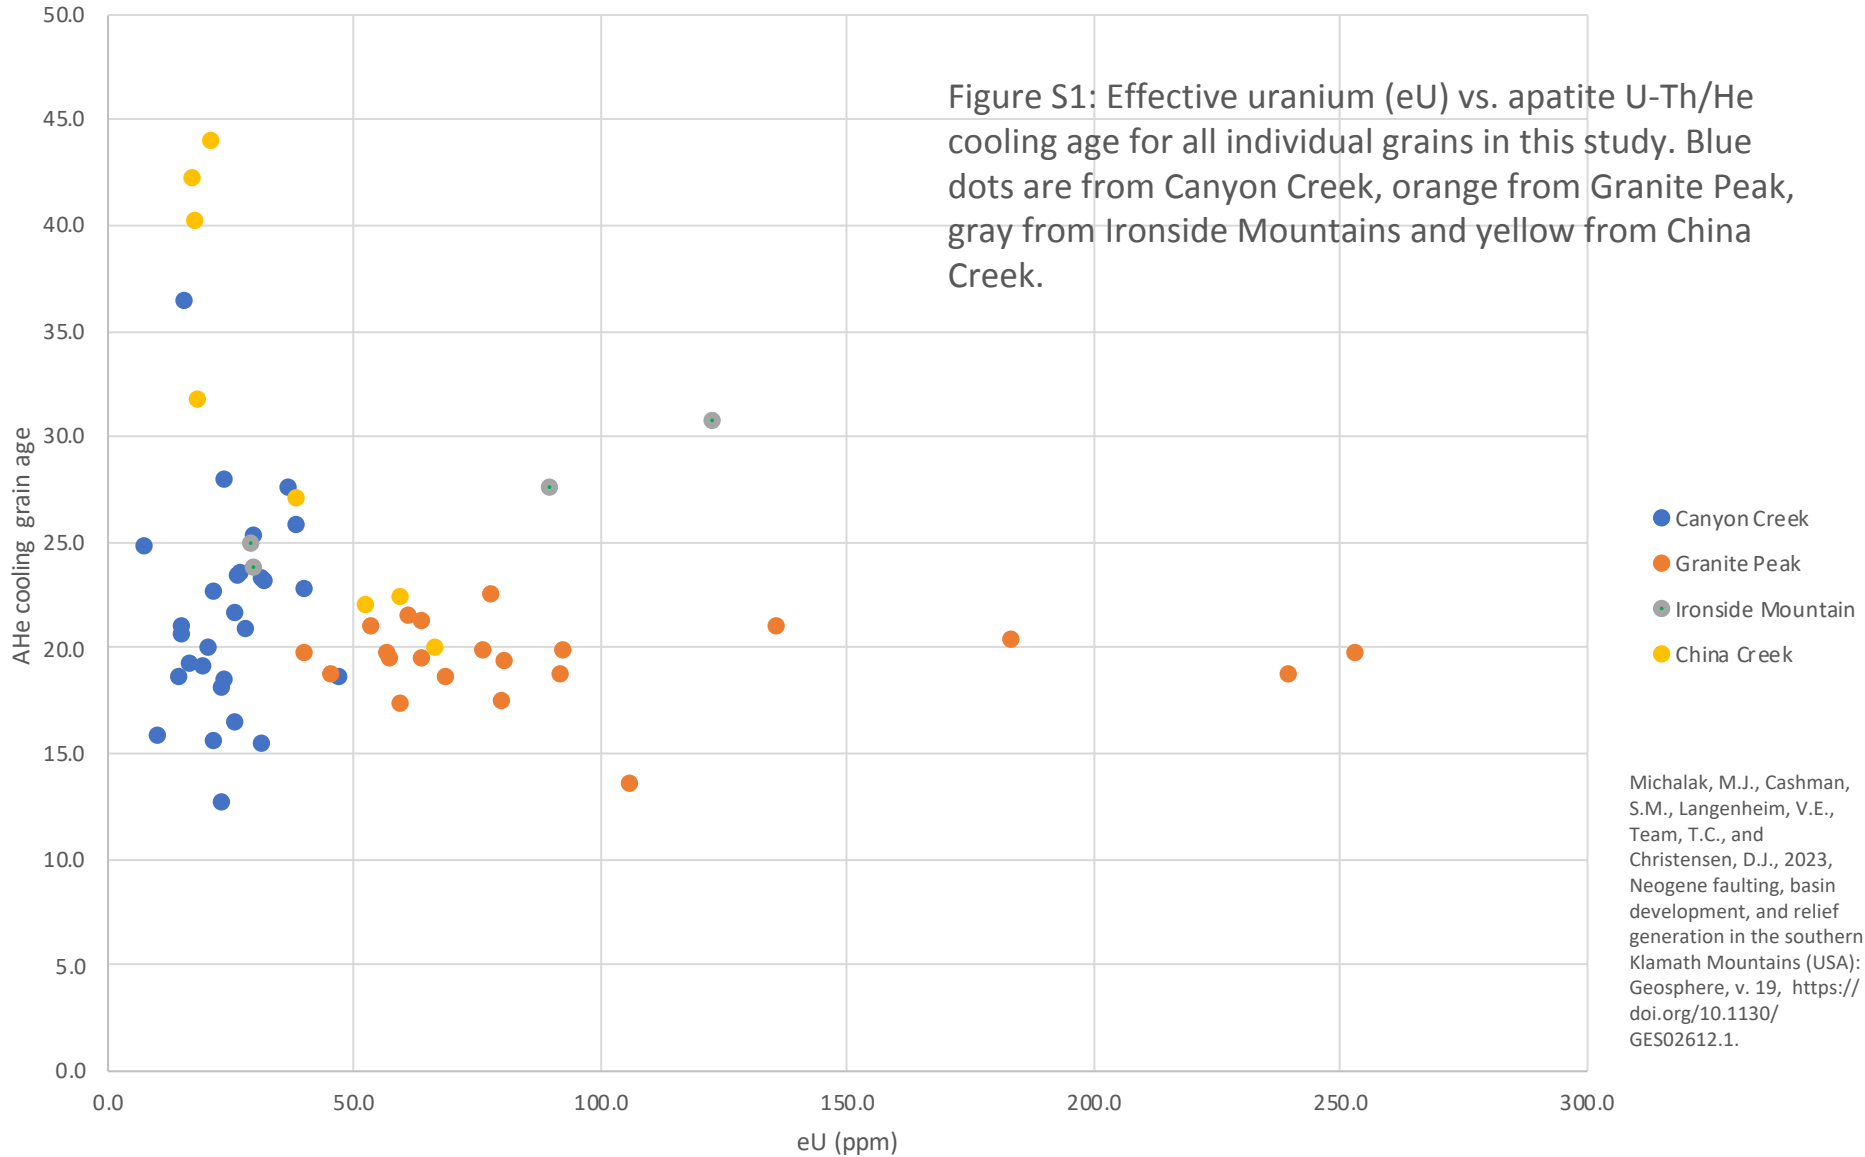

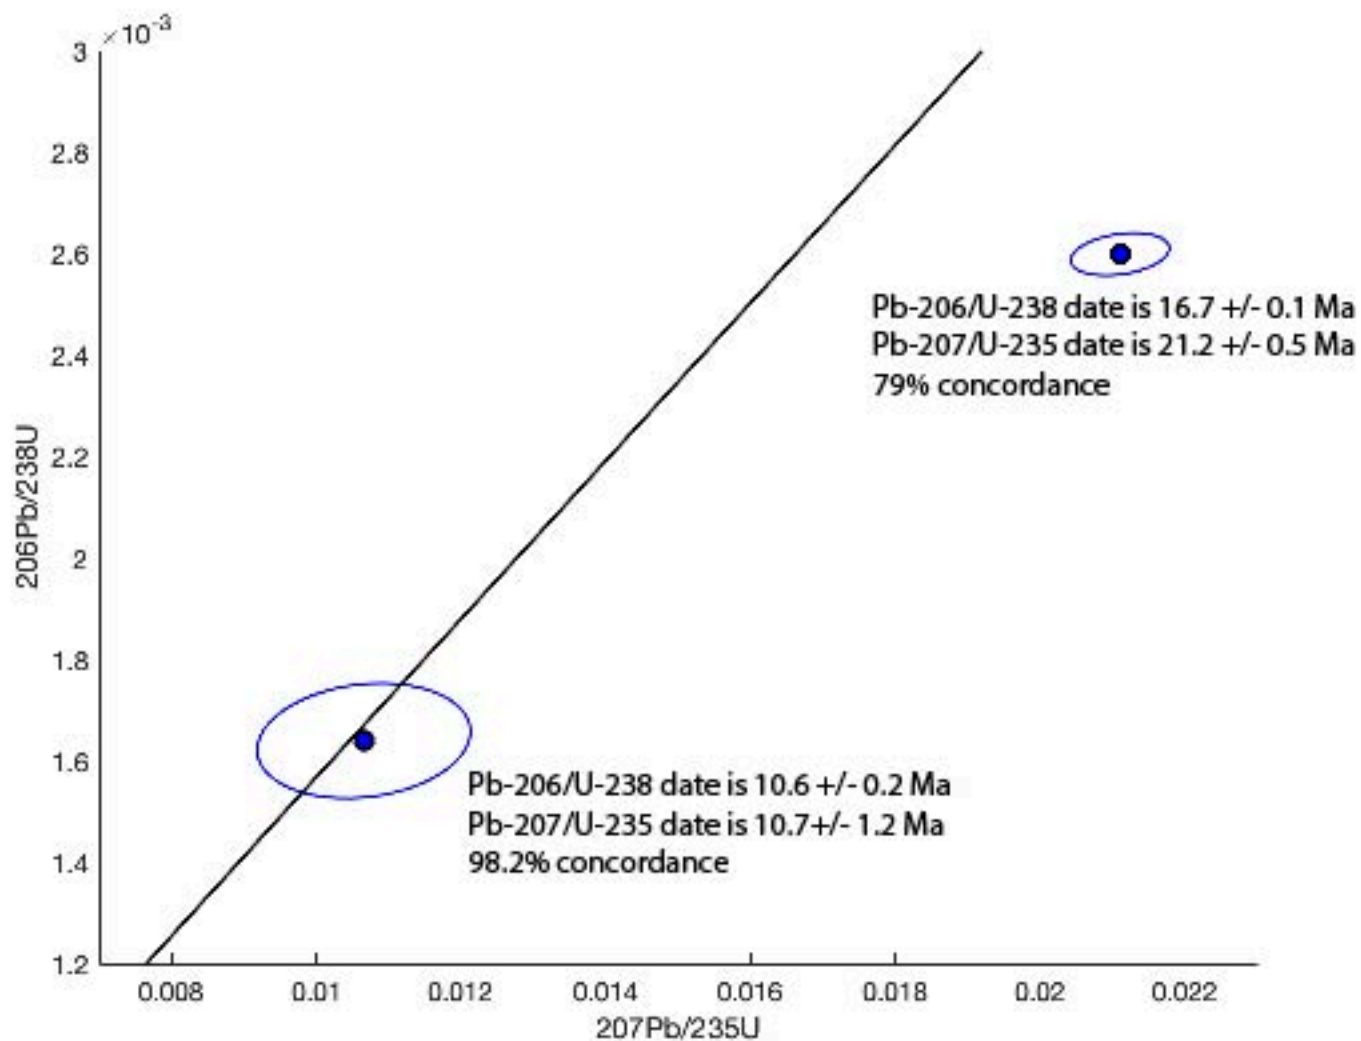

Figure S2: A Wetherill Concordia plot with the two Miocene U-Pb zircon ages from the Lowden Ranch basin sample. Black solid line represents concordia between the Pb-206/U-238 and Pb-207/U-235 systems. Blue ellipses show 2 sigma uncertainties, and ages are reported with 1 sigma uncertainties.
